# Supplementary material
Source: Research Square preprint supplement (doi:10.21203/rs.3.rs-9538133/v1)
Supplement: Supplementary file 1 [file 31f8c2bf86f401426bfcd312.docx]

**Clinical Study Protocol**

**An Open-Label, Single-Arm, Multicenter Phase 2 Clinical Study to Evaluate the Efficacy and Safety of LP-168 in Relapsed or Refractory Mantle Cell Lymphoma**

| Study Drug: | **LP-168 Tablets** |
| --- | --- |
| Leading Study Site: | **Beijing Cancer Hospital** |
| Leading Principal Investigator: | **Jun Zhu** |
| Sponsor: | **Guangzhou Lupeng Pharmaceutical Co., Ltd.** |
| Protocol No.: | **LP-168-CN201** |
| Version No.: | **Version 1.1** |
| Version Date: | **October 10, 2023** |
|  |  |

| Confidentiality Statement |
| --- |
| The information contained in this document, particularly unpublished data, is the property of or is under the control of Guangzhou Lupeng Pharmaceutical Co., Ltd. It is hereby provided in confidence to you, as a researcher, potential researcher, or consultant, and is intended solely for review by you, your staff, and the relevant Ethics Committee. All information is provided only for your use when you are authorized to conduct the clinical study of the investigational drug described in this protocol. No information contained herein may be disclosed to any other person without the written consent of Guangzhou Lupeng Pharmaceutical Co., Ltd., except to the extent necessary for obtaining informed consent from those individuals who may receive the drug. |

**An Open-Label, Single-Arm, Multicenter Phase 2 Clinical Study to Evaluate the Efficacy and Safety of LP-168 in Relapsed or Refractory Mantle Cell Lymphoma**

**Protocol Signature Page**

| **Sponsor:** | I will earnestly fulfill the responsibilities of the sponsor in accordance with the *Good Clinical Practice* and other relevant regulations and guidelines.  Guangzhou Lupeng Pharmaceutical Co., Ltd.  Signature of Medical Reviewer: 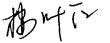  Date: November 1, 2023 |
| --- | --- |

**An Open-Label, Single-Arm, Multicenter Phase 2 Clinical Study to Evaluate the Efficacy and Safety of LP-168 in Relapsed or Refractory Mantle Cell Lymphoma**

**Protocol Signature Page**

| **Study Site:** | I will earnestly fulfill the responsibilities as a professional responsible person and carry out the clinical trial as per the protocol in accordance with the provisions of *Good Clinical Practice*, *Guidelines for Management of Biological Sample Analysis Laboratories for Drug Clinical Trials (Interim)* and other relevant regulations and guidelines.  Site Name: Beijing Cancer Hospital  Signature of Leading Principal Investigator: 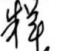  Date: October 19, 2023 |
| --- | --- |

**An Open-Label, Single-Arm, Multicenter Phase 2 Clinical Study to Evaluate the Efficacy and Safety of LP-168 in Relapsed or Refractory Mantle Cell Lymphoma**

**Protocol Signature Page**

| **Study Site:** | I will earnestly fulfill the responsibilities as a professional responsible person and carry out the clinical trial as per the protocol in accordance with the provisions of *Good Clinical Practice*, *Guidelines for Management of Biological Sample Analysis Laboratories for Drug Clinical Trials (Interim)* and other relevant regulations and guidelines.  Site Name: Beijing Cancer Hospital  Signature of Principal Investigator: 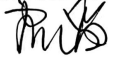  Date: October 19, 2023 |
| --- | --- |

**An Open-Label, Single-Arm, Multicenter Phase 2 Clinical Study to Evaluate the Efficacy and Safety of LP-168 in Relapsed or Refractory Mantle Cell Lymphoma**

**Protocol Signature Page**

| **Testing and Analysis Institution:** | I will earnestly fulfill the responsibilities of the detection and analysis institution and carry out biological sample testing as per the protocol in accordance *Good Clinical Practice*, *Guidelines for Management of Biological Sample Analysis Laboratories for Drug Clinical Trials (Interim)*, *Guidelines for Validation of Quantitative Analysis Methods for Biological Samples* and other relevant regulations and guidelines.  Name of Testing and Analysis Institution: Wuhan Hongren Biopharmaceutical Inc.  [Seal] Wuhan Hongren Biopharmaceutical Inc.  Signature of Study Director: 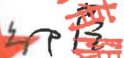  Date: October 10, 2023 |
| --- | --- |

**An Open-Label, Single-Arm, Multicenter Phase 2 Clinical Study to Evaluate the Efficacy and Safety of LP-168 in Relapsed or Refractory Mantle Cell Lymphoma**

**Protocol Signature Page**

| **Testing and Analysis Institution:** | I will earnestly fulfill the responsibilities of the detection and analysis institution and carry out biological sample testing as per the protocol in accordance *Good Clinical Practice*, *Guidelines for Management of Biological Sample Analysis Laboratories for Drug Clinical Trials (Interim)*, *Guidelines for Validation of Quantitative Analysis Methods for Biological Samples* and other relevant regulations and guidelines.  Name of Testing and Analysis Institution: Guangzhou KingMed Medical Laboratory Center Co., Ltd.  Signature of Study Director: 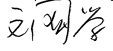  Date: October 10, 2023 |
| --- | --- |

**An Open-Label, Single-Arm, Multicenter Phase 2 Clinical Study to Evaluate the Efficacy and Safety of LP-168 in Relapsed or Refractory Mantle Cell Lymphoma**

**Protocol Signature Page**

| **Data Management and Statistical Analysis Institution:** | I will earnestly fulfill the responsibilities of data management and statistical analysis institution in accordance with the *Good Clinical Practice*, *Technical Guidelines for Clinical Trial Data Management*, *Technical Guidelines for Electronic Data Capture (EDC) in Clinical Trials*, *Guidelines for Planning and Reporting of Drug Clinical Trial Data Management and Statistical Analysis*, *Guidelines for Biostatistics in Drug Clinical Trials* and other relevant regulations and guidelines.  Name of Data Management and Statistical Analysis Institution:  Signature of Responsible Person for Data Management: 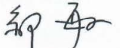  Date: October 10, 2023  Signature of Responsible Person for Statistical Analysis: 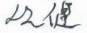  Date: October 10, 2023 |
| --- | --- |

**Clinical Study Protocol**

| **Study Title** | An Open-Label, Single-Arm, Multicenter Phase 2 Clinical Study to Evaluate the Efficacy and Safety of LP-168 in Relapsed or Refractory Mantle Cell Lymphoma | |
| --- | --- | --- |
| **Leading Site** | | Beijing Cancer Hospital |
| **Principal Investigator** | | Jun Zhu |
| **Sponsor** | | Guangzhou Lupeng Pharmaceutical Co., Ltd. |
| **Clinical Study Notification** | |  |
| **Protocol Number** | | LP-168-CN201 |
| **Medical Monitor of Lupeng Pharmaceutical** | | Fenlai Tan |
| **Protocol Version/Date** | | Version 1.1/October 10, 2023 |

Table of Contents

[List of Abbreviations 1](#_Toc16452)

[Protocol Synopsis of An Open-Label, Single-Arm, Multicenter Phase 2 Clinical Study to Evaluate the Efficacy and Safety of LP-168 in Relapsed or Refractory Mantle Cell Lymphoma 4](#_Toc21296)

[Study Flow Chart 18](#_Toc9445)

[1. Overview 27](#_Toc3343)

[1.1 Background of Mantle Cell Lymphoma 27](#_Toc1697)

[1.2 Development Background and Drug Introduction of BTK Inhibitors 30](#_Toc26083)

[2. Primary Results of Preclinical Studies 34](#_Toc32167)

[2.1 Pharmacology Studies 34](#_Toc2415)

[2.2 Pharmacokinetic Studies 35](#_Toc20939)

[2.3 Toxicology Studies 39](#_Toc18126)

[2.4 Summary of Preclinical Study Data 41](#_Toc2541)

[3. Selection of Target Dose in the Study 42](#_Toc29899)

[3.1 Introduction and Progress of Conducted Clinical Studies 43](#_Toc1903)

[3.1.1 LP-168-CN101 Study 43](#_Toc17913)

[3.1.2 LP-168-US-I01 Study 43](#_Toc5738)

[3.1.2 LP-168-CN102 Study 44](#_Toc29333)

[3.2 PK and PD Data from Conducted Clinical Studies 45](#_Toc24714)

[3.3 Summary of Safety Data from Conducted Clinical Studies 45](#_Toc3706)

[3.3.1 LP-168-CN101 Study 45](#_Toc24496)

[3.3.2 LP-168-US-I01 Study 48](#_Toc21420)

[3.3.3 LP-168-CN102 Study 49](#_Toc5840)

[3.4 Efficacy Data from Conducted Clinical Studies 50](#_Toc11846)

[3.4.1 LP-168-CN101 Study 50](#_Toc19117)

[3.4.2 LP-168-US-I01 Study 52](#_Toc31953)

[3.5 Dose-Exposure-Response Correlation Analysis 52](#_Toc335)

[3.6 Dose Selection of the Study 56](#_Toc20551)

[4. Study Objectives 57](#_Toc1653)

[4.1 Primary Objective 57](#_Toc4442)

[4.2 Secondary Objectives 57](#_Toc25680)

[4.3 Exploratory Objectives 57](#_Toc23727)

[5. Study Endpoints and Estimands 57](#_Toc31554)

[5.1 Primary Endpoint 57](#_Toc13866)

[5.2 Secondary Endpoints 57](#_Toc30846)

[5.3 Exploratory Endpoints 58](#_Toc29579)

[5.4 Estimands 58](#_Toc10936)

[6. Subject Population 60](#_Toc224)

[6.1 Inclusion Criteria 60](#_Toc27978)

[6.2 Exclusion Criteria 63](#_Toc30107)

[6.3 Definition of Treatment Failure, Relapse, or Intolerance, etc. 66](#_Toc25966)

[7. Study Design 67](#_Toc26447)

[7.1 Overall Design Thinking 67](#_Toc27277)

[7.2 Efficacy and Safety Analysis 68](#_Toc3937)

[7.3 Criteria for End of Treatment 68](#_Toc31147)

[7.4 Criteria for Termination of the Study 68](#_Toc17199)

[8. Study Steps and Process 69](#_Toc21871)

[8.1 Screening Period (D-28 ~) 69](#_Toc31352)

[8.2 Baseline Period (D-1) 74](#_Toc16237)

[8.3 Treatment and Observation Periods 74](#_Toc15889)

[8.4 Study Precautions 83](#_Toc23689)

[8.5 Evaluation Criteria for Effectiveness and Toxicity 84](#_Toc26919)

[8.6 Concomitant Medications 84](#_Toc9648)

[8.7 Dose Interruption and Modification 86](#_Toc14745)

[9. Study Drug 88](#_Toc3910)

[9.1 Name, Physicochemical Properties, Strength and Storage of the Drug 88](#_Toc20534)

[9.2 Drug Packaging and Labeling 88](#_Toc9452)

[9.3 Screening Number 88](#_Toc2023)

[9.4 Enrollment Number 89](#_Toc1167)

[9.5 Receipt, Dispensing and Return of Study Drug 89](#_Toc768)

[9.6 Subject Compliance 89](#_Toc15072)

[10. Pharmacokinetic and Pharmacodynamic Studies 90](#_Toc2134)

[10.1 Study Procedures 90](#_Toc21671)

[10.2 Pk Blood Sampling Time 91](#_Toc21962)

[10.3 PK Intensive Sampling 91](#_Toc21390)

[10.4 PK Sparse Sampling 92](#_Toc31849)

[10.5 Time Recording 92](#_Toc27219)

[10.6 Sample Transportation 92](#_Toc14931)

[10.7 Sample Analysis Method 92](#_Toc17287)

[11. Data Management 92](#_Toc10498)

[11.1 CRF Design 93](#_Toc28479)

[11.2 Database Creation 93](#_Toc2732)

[11.3 Data Entry 93](#_Toc14184)

[11.4 Data Query 94](#_Toc6101)

[11.5 SAE Consistency Verification 94](#_Toc22429)

[11.6 Medical Coding 94](#_Toc30282)

[11.7 Data Review and Lock 95](#_Toc15525)

[11.8 Data Management Report 95](#_Toc3357)

[12. Statistical Analysis 96](#_Toc20751)

[12.1 Study Hypothesis and Multiplicity Considerations 96](#_Toc17754)

[12.2 Sample Size Estimation 96](#_Toc18309)

[12.3 Analysis Populations 97](#_Toc1421)

[12.4 Statistical Analysis Method 97](#_Toc6343)

[12.5 Quality of Life 100](#_Toc26196)

[12.6 Efficacy Evaluation 100](#_Toc23150)

[12.7 Subgroup Analyses 101](#_Toc20618)

[12.8 Exploratory Analyses 101](#_Toc31187)

[12.9 Interim Analysis and Statistical Analysis Plan 101](#_Toc12899)

[12.10 Primary Analysis Time 101](#_Toc6807)

[13. Pharmacokinetic and Pharmacodynamic Evaluations 102](#_Toc3392)

[13.1 Evaluation of Bioanalytical Methodology 102](#_Toc20644)

[13.2 Drug Concentration Analysis 102](#_Toc7371)

[13.3 Pharmacokinetic Evaluation Indicators 102](#_Toc31761)

[13.4 Pharmacokinetic Parameter Analysis 103](#_Toc16129)

[13.4 Population Pharmacokinetic Analysis 103](#_Toc4125)

[14. Safety Assessments 104](#_Toc23156)

[14.1 Definition of Adverse Events 105](#_Toc24604)

[14.2 Unexpected Adverse Reactions 106](#_Toc2061)

[14.3 Observation, Recording and Reporting of Adverse Events 106](#_Toc28848)

[14.4 Methods for Discovering Adverse Events 106](#_Toc13271)

[14.5 Time of Collection of Adverse Events 107](#_Toc13641)

[14.6 Collection of Data of Adverse Events 107](#_Toc19136)

[14.7 Criteria for Judging the Severity of Adverse Events 107](#_Toc8862)

[14.8 Correlation Evaluation of the Adverse Event and the Drug 107](#_Toc11754)

[14.9 Judgment of Adverse Reactions 108](#_Toc66)

[14.10 Treatment, Follow-up and Duration of Adverse Events 109](#_Toc26034)

[14.11 Judgment and Handling of Laboratory Indicator Abnormalities 109](#_Toc13411)

[14.12 Potential Adverse Events and Control 109](#_Toc19966)

[14.13 Adverse Events of Special Interest (AESIs) 116](#_Toc15688)

[14.14 Serious Adverse Events 116](#_Toc2747)

[14.15 Suspected Unexpected Serious Adverse Reactions (SUSARs) 119](#_Toc21746)

[15. Study Management 122](#_Toc4493)

[15.1 Monitoring 122](#_Toc12586)

[15.2 Data Verification 122](#_Toc7283)

[15.3 Audit and Inspection 122](#_Toc23784)

[15.4 Personnel Training 122](#_Toc12940)

[15.5 Data Collection and Processing 123](#_Toc21190)

[15.6 Sample Testing of Central Laboratory 123](#_Toc22986)

[16. Ethics, Laws and Administrative Management 124](#_Toc19628)

[16.1 Ethics Committee 124](#_Toc10174)

[16.2 Informed Consent Form 124](#_Toc6643)

[16.3 Records Retention 125](#_Toc15141)

[16.4 Study Protocol Amendment 125](#_Toc25679)

[16.5 Qualification Certificate of Clinical Laboratory and Normal Range of Clinical Examination 125](#_Toc9723)

[16.6 Signature Page of the Clinical Study Protocol 125](#_Toc16171)

[16.7 Expected Trial Duration 126](#_Toc22514)

[Appendices 127](#_Toc9161)

[Appendix 1: ECOG Performance Status Criteria 127](#_Toc17369)

[Appendix 2: IPI Score and MIPI Assessment Criteria 128](#_Toc15407)

[Appendix 3: List of CYP3A Inhibitors or Inducers & Sensitive Substrates of OATP1B1/OATP1B3 & Clinically Commonly Used H2 Receptor Blockers and Proton Pump Inhibitors 129](#_Toc24444)

[Appendix 4: Drugs for Prolonging QT Interval and/or Inducing Torsades de Pointes 131](#_Toc18966)

[Appendix 5: Lugano 2014 Criteria for Assessing Lymphoma (Cheson et al) 132](#_Toc24692)

[Appendix 6: List of Laboratory Tests 136](#_Toc24518)

[Appendix 7: Descriptive Summary of Cases Consistent with Hy's Law 139](#_Toc30318)

[References: 140](#_Toc25915)

# List of Abbreviations

| **Abbreviation and Terminology** | **Interpretation** |
| --- | --- |
| aCRF | Annotated Case Report Form |
| AE | Adverse Event |
| ALB | Albumin |
| ALP | Alkaline phosphatase |
| ALT | Alanine aminotransferase |
| ANC | Absolute neutrophil count |
| APTT | Activated partial thromboplastin time |
| AST | Aspartate aminotransferase |
| AUC | Area under the curve |
| AUC0-T | Area under the plasma concentration-time curve from time 0 (predose) to the time of last quantifiable concentration (Tlast) |
| AUC0-∞ | Area under the plasma concentration-time curve from time 0 (predose) extrapolated to infinity |
| BIL | Bilirubin |
| BCL-2 | B-cell lymphoma/leukemia-2 gene/protein |
| BTK | Bruton's tyrosine kinase |
| CD20 | Cluster of differentiation 20 |
| CL | Plasma clearance |
| CI | Confidence interval |
| Cr | Creatinine |
| CR | Complete response |
| CRF | Case Report Form |
| CRC | Clinical Research Coordinator |
| CRO | Contract Research Organization |
| CT | Computed tomography |
| CTC | Common toxicity criteria |
| CYP3A | Cytochrome P450 superfamily 3A |
| R/R MCL | Relapsed or refractory mantle cell lymphoma |
| DLT | Dose-limiting toxicity |
| DMP | Data management plan |
| DMR | Data management report |
| DOR | Duration of response |
| EC | Edit check |
| ECG | Electrocardiogram |
| ECOG | Eastern Cooperative Oncology Group |
| eCRF | Electronic Case Report Form |
| EDC | Electronic Data Capture System |
| EOT | End of treatment |
| EPO | Erythropoietin |
| FAS | Full analysis set |
| FIB | Fibrinogen |
| FIH | First in human |
| GCP | Good Clinical Practice |
| G-CSF | Granulocyte colony stimulating factor |
| HGB | Hemoglobin |
| HBcAb | Hepatitis B core antibody |
| HBeAb | Hepatitis B e antibody |
| HBeAg | Hepatitis B e antigen |
| HBsAb | Hepatitis B surface antibody |
| HBsAg | Hepatitis B surface antigen |
| HBV | Hepatitis B virus |
| HCL | Hairy cell leukemia |
| HCT | Hematocrit |
| HCV | Hepatitis C virus |
| HIV | Human immunodeficiency virus |
| HNSTD | Highest non-severely toxic dose |
| ICH | International Conference on Harmonisation |
| IGHV | Immunoglobulin heavy chain variable region gene |
| IPI | International Prognostic Index |
| ITT | Intent-to-treat population |
| LYMPH | Lymphocyte |
| MCL | Mantle cell lymphoma |
| MedDRA | Medical Dictionary for Regulatory Activities |
| MIPI | Mantle cell lymphoma International Prognostic Index |
| MRI | Magnetic resonance imaging |
| MTD | Maximum tolerance dose |
| NE# | Absolute neutrophil count |
| NHL | Non-Hodgkin's lymphoma |
| NMPA | National Medical Products Administration |
| OATP | Organic anion-transporting polypeptide |
| ORR | Objective response rate |
| OS | Overall survival |
| PFS | Progression-free survival |
| PK | Pharmacokinetics |
| PKS | Pharmacokinetic set |
| PLC2 | Phospholipase C2 |
| PLT | Platelet |
| PT | Prothrombin time |
| PPS | Per-protocol set |
| PV | Pharmacovigilance |
| SS | Safety set |
| QD | quaque die |
| QoL | Quality of life |
| QTc | Corrected QT interval |
| QTcF | Corrected QT interval Fridericia formula |
| RBC | Red blood cell count |
| RP2D | Recomended Phase 2 dose |
| SAE | Serious Adverse Events |
| SD | Stable disease |
| SDV | Source data verification |
| T1/2 | Elimination half-life |
| TBIL | Total bilirubin |
| TPO | Thrombopoietin |
| TP53 | Tumor protein P53 |
| TRAE | Treatment-related adverse event |
| TTR | Time to response |
| ULN | Upper limit of normal |
| Vd/F | Apparent volume of distribution |
| WHO | World Health Organization |
| WHODD | World Health Organization Drug Dictionary |

# Protocol Synopsis of An Open-Label, Single-Arm, Multicenter Phase 2 Clinical Study to Evaluate the Efficacy and Safety of LP-168 in Relapsed or Refractory Mantle Cell Lymphoma

| **Sponsor:** Guangzhou Lupeng Pharmaceutical Co., Ltd. | **Protocol No.:** LP-168-CN201 |
| --- | --- |
| **Study Drug:** LP-168 (25 mg and 100 mg) | **Development Phase:** Phase 2 |
| **Version No.:** 1.1 | **Version Date:** October 10, 2023 |
| **Brief title of trial:** A Phase 2 Clinical Study of LP-168 Tablets in the Treatment of Relapsed/Refractory Mantle Cell Lymphoma | |
| **Full title of trial:**  An Open-Label, Single-Arm, Multicenter Phase 2 Clinical Study to Evaluate the Efficacy and Safety of LP-168 in Relapsed or Refractory Mantle Cell Lymphoma | |
| **Study Objectives:**  Primary objective:   - To evaluate the overall response rate (ORR) of LP-168 tablets in subjects with relapsed or refractory mantle cell lymphoma (R/R MCL)   Secondary objectives:   - To evaluate the complete response (CR) rate, progression-free survival (PFS), overall survival (OS), duration of response (DOR), and time to response (TTR) of subjects with R/R MCL receiving treatment with LP-168 tablets. - To evaluate the safety and tolerability of LP-168 monotherapy in subjects with R/R MCL. - To evaluate the improvement in quality of life (QoL) by LP-168 monotherapy in subjects with R/R MCL as measured by the EORTC QLQ-C30 questionnaire - To evaluate the pharmacokinetic (PK) characteristics of LP-168   Exploratory objectives:   - To evaluate the correlation of potential biomarkers in lymphoma tissue or circulating lymphoma cells with efficacy parameters of LP-168 monotherapy, etc. - To evaluate the intrinsic or extrinsic factors that may affect metrics of exposure to the study drug | |
| **Study Endpoints:**  Primary endpoint:   - Overall response rate (ORR) [complete response (CR) + partial response (PR)] as assessed by Independent Review Committee (IRC) according to the Lugano 2014 Response Criteria for Lymphoma   Secondary endpoints:   - ORR as assessed by the investigator according to the Lugano 2014 Response Criteria. - CR rate, PFS, OS, DOR, and TTR by IRC or investigator assessment. - Safety evaluation including vital signs, physical examination, electrocardiogram (ECG) parameters, ECOG performance status, laboratory tests, and adverse events (AEs). - Change in subject-reported QoL as measured by the EORTC QLQ-C30 questionnaire - PK characteristics of LP-168 and the correlation of metrics of exposure with efficacy and safety:   PK characteristics include pharmacokinetic parameters such as maximum concentration (Cmax), time to maximum concentration (Tmax), half-life (T1/2), area under plasma concentration-time curve (AUC0-t), clearance (CL/F) and apparent volume of distribution (Vd/F)  Exploratory endpoints:   - To evaluate the correlation of potential biomarkers (e.g., BTK mutation, PLC mutation, TP53 mutation) in lymphoma tissue/circulating lymphoma cells with efficacy of LP-168 monotherapy - To evaluate the effect of intrinsic or extrinsic factors such as age, liver function and renal function on the exposure to the study drug by conducting covariate analysis in the population pharmacokinetic model. | |
| **Principal Investigator:** Jun Zhu | |
| **Study Site:** Beijing Cancer Hospital | |
| **Study Population**: subjects with mantle cell lymphoma who have failed or relapsed from or intolerant to treatment containing at least one BTK inhibitor and an anti-CD20 antibody | |
| **Target Number of Subjects to Be Enrolled:**  Approximately 62 subjects are planned to be enrolled. | |
| **Study Design and Study Procedures:**  This is a single-arm, open-label, multicenter Phase 2 clinical study to evaluate the efficacy and safety of LP-168 in subjects with relapsed or refractory MCL. In this study, it is planned to enroll approximately 62 subjects with MCL who have failed treatment with a Bruton's tyrosine kinase (BTK) inhibitor and an anti-CD20 antibody-containing therapy or relapsed after achieving a response or are intolerant to such therapy. Eligible subjects will take LP-168 150 mg with approximately 240 mL of water once daily before meals (except for the period from 1 hour before to 2 hours after a meal) at a fixed time each day as far as possible, with 28 days as 1 treatment cycle, until disease progression, unacceptable toxicity, or satisfaction of other criteria for treatment discontinuation.  Safety evaluation is planned on C1D1, C1D8, C1D15 and C1D28, respectively. Safety evaluation will be performed on Day 28 of each cycle from C2 to C8; and every 3 cycles thereafter, including physical examination, vital signs, ECG, hematology, blood biochemistry, coagulation function, adverse events, etc. See the flow chart for details.  Efficacy evaluation is planned to be performed on Days 21-28 of C2, C4, C6 and C8 (or when necessary as determined by the investigator; if the unscheduled evaluation time point is ≤ 1 treatment cycle from the scheduled efficacy evaluation time point, the scheduled efficacy evaluation can be skipped and performed at the next scheduled efficacy evaluation time point), and thereafter once every 3 cycles until disease progression, death, withdrawal of informed consent, etc.; for subjects who discontinue study treatment for reasons other than disease progression, efficacy evaluation is recommended every 12 weeks ± 7 days after discontinuation until disease progression, death, initiation of subsequent anti-cancer therapy, or withdrawal of informed consent, whichever occurs first. The efficacy evaluation includes imaging examinations such as CT and PET/CT, bone marrow biopsy, physical examination, etc.;  PK intensive sampling is planned in this study: Some subjects enrolled in some study sites are planned to undergo intensive sampling of plasma samples for pharmacokinetic study. The total number of subjects undergoing PK intensive sampling is not less than 15. Sampling time points: within 1 h before administration on the day of C1D15 (± 1 day) visit (or 24 h ± 30 min after administration on the day before this visit, whichever comes first), and 0.5 h ± 3 min, 1 h ± 5 min, 2 h ± 5 min, 3 h ± 5 min, 4 h ± 5 min, 6 h ± 5 min, 8 h ± 10 min and 24 h ± 30 min after administration on the day of C1D15 (± 1 day) visit (to be collected before administration on C1D16). Subjects who undergo PK intensive sampling will not undergo PK sparse sampling on C1D15, but will still be required to undergo PK sparse sampling on C1D28 and thereafter. PK sparse sampling: All subjects enrolled in this study are required to undergo sparse sampling of plasma samples at the time points pre-specified in the protocol for population pharmacokinetic study. Sampling time points: within 1 h before administration (or 24 h ± 30 min after administration on the day before the visit, whichever comes first) and 2 h ± 10 min after administration on C1D15 (± 1 day), C1D28 (± 1 day), C2D28 (± 3 days), C3D28 (± 3 days) and C4D28 (± 3 days). In case of dose interruption or misadministration, PK blood sampling is allowed to be postponed or cancelled.  All existing AEs or SAEs before termination of the study treatment, or all new AEs or SAEs occurring within 28 days after the last dose will be followed up until resolution, stabilization/return to baseline, stable and unlikely improved AEs as assessed by the investigator, or loss to follow-up of patients, whichever occurs first. | |
| **Inclusion and Exclusion Criteria:**  Inclusion Criteria  Each patient must meet all of the following inclusion criteria to be eligible for inclusion in the study:   1. Men and women ≥ 18 years of age. 2. Patients with histologically confirmed mantle cell lymphoma (MCL) with chromosome translocation t(11;14) and/or overexpress cyclin D1 and/or CCND1 gene rearrangement according to 2017 Revised WHO Classification Criteria for Lymphoma. For these patients, adequate tumor tissue blocks or slides are required to be sent to central laboratory for confirmation of pathological diagnosis . 3. At least one measurable lesion (> 1.5 cm in longest diameter for lymph node lesions or > 1.0 cm in longest diameter for extranodal lesions). 4. Subjects who have failed or relapsed after a prior anti-CD20 mAb-containing regimen and treatment with at least one BTK inhibitor or are intolerant to such therapy (if the subject is previously intolerant to anti-CD20 mAb, only one dose of prior anti-CD20 mAb therapy is allowed; the use of anti-CD20 monoclonal antibodies in combination with BTK inhibitors is permitted within the same line of therapy); or subjects who have failed treatment with a BTK inhibitor or relapsed after or are intolerant to a BTK inhibitor and are ineligible for treatment with an anti-CD20 mAb-containing regimen (see 6.3 Definition of Treatment Failure, Relapse, or Intolerance, etc.). 5. Subjects with Eastern Cooperative Oncology Group (ECOG) performance status ≤ 2 points. 6. Subjects with a life expectancy of ≥ 12 weeks as judged by the investigator. 7. Subjects should have adequate coagulation function, and liver and kidney function, and local laboratory tests should meet the following criteria:   a). Coagulation function: prothrombin time (PT) and activated partial thromboplastin time (APTT) ≤ 1.5 x upper limit of normal (ULN);  b). Liver: aspartate aminotransferase (AST) and alanine aminotransferase (ALT) ≤ 3 × ULN; total serum bilirubin ≤ 1.5 × ULN, if there is definite Gilbert syndrome (unconjugated hyperbilirubinemia), total bilirubin ≤ 3.0 × ULN; if hepatic impairment is considered to be caused by liver involvement by lymphoma, AST and ALT ≤ 5 × ULN, and total serum bilirubin ≤ 3.0 × ULN, on the premise that the investigator and sponsor agree to the enrollment after assessment;  c). Pancreas: serum amylase and serum lipase ≤ 1.5 × ULN (with the exception of those without pancreatitis in the judgement of the investigator based on ultrasound, magnetic resonance imaging or CT and other imaging examinations as well as clinical manifestations);  d). Kidney: Serum creatinine (Scr) ≤ 1.5 × ULN, or creatinine clearance (Ccr) ≥ 50 mL/min (calculated by the Cockcroft-Gault formula or using a 24-hour urine sample).  When serum creatinine is expressed in mg/dL:  When serum creatinine is expressed in μmol/L:   1. Subjects with adequate peripheral blood cell count whose hematology test before the first dose must meet the following criteria:   a). Absolute neutrophil count (ANC) ≥ 1.0 × 109/L [independent of granulocyte colony-stimulating factor (G-CSF) within 5 days prior to screening]. The use of colony-stimulating factors is allowed if, in the investigator's judgment, the neutropenia is due to bone marrow involvement by MCL.  b). Platelet ≥ 50 × 109/L (without platelet transfusion within 5 days prior to screening; growth factors/cytokines such as TPO and IL-11 are allowed). If platelet decrease is considered to be caused by lymphoma progression, platelet ≥ 30 × 109/L and no obvious hemorrhage diathesis as determined by the investigator.  c). Hemoglobin ≥ 8.0 g/dL (without red blood cell transfusion within 7 days prior to screening; growth factors such as EPO are allowed);   1. Toxicity of prior anti-cancer therapy and surgical complications resolved to ≤ Grade 1 according to NCI CTCAE 5.0 (with the exception of alopecia, hematologic toxicity, or other toxicity considered by the investigator to pose no safety risk to subjects after discussion with the sponsor). 2. All male and female subjects of childbearing potential should use medically approved contraceptive measures throughout the treatment period and for 90 days after the end of treatment; females of childbearing potential who are premenopausal (e.g., not menstruated for more than 1 year or not surgically sterilized) must have a negative serum pregnancy test within 7 days prior to the start of treatment (if the screening serum pregnancy result exceeds 7 days, a serum or urine pregnancy test must be performed prior to dosing, and the patient can be enrolled only after the negative result is obtained), and must be in non-lactating period; male subjects are not allowed to donate sperm during the study treatment and for 90 days after the end of treatment. 3. Subjects must be willing to undergo protocol-specified bone marrow examination. 4. Subjects voluntarily participate in the study and sign the informed consent form, and understand and agree to follow the treatment regimen and visit plan.   Exclusion Criteria  Patients who meet any of the following criteria will be excluded from this study:   1. Subjects with primary central nervous system (CNS) lymphoma or CNS involvement by lymphoma (including patients with CNS lymphoma currently in complete response). 2. Subjects with hypersensitivity to LP-168 or any of its excipients, including microcrystalline cellulose, croscarmellose sodium, magnesium stearate, fumaric acid, and gastro-soluble film coating premix. 3. Subjects who have received treatment with any non-covalent BTK inhibitor. 4. Subjects who have received treatment with any BTK-targeted protein degradation chimera. 5. Subjects who have received or been exposed to the following therapies within 4 weeks or within 5 half-lives (whichever is shorter) prior to the first dose of LP-168:    1. Anti-cancer therapy including anti-cancer chemotherapy, targeted therapy, biotherapy and/or immunotherapy;    2. Any kind of investigational agent;    3. Major surgery (generally defined as grade 3 surgery and above) or significant trauma. 6. Subjects who have received the following treatment within 2 weeks prior to the first dose of LP-168:    1. Systemic glucocorticoids equivalent to prednisone at doses > 20 mg/day for 3 or more days; or single daily dose > 50 mg;    2. Treatment with Chinese herbal medicine for the purpose of anti-cancer;    3. Local radiotherapy for the treatment of MCL;    4. Strong or moderate CYP3A4/5 inhibitors and inducers, sensitive substrates of OATP1B1/OATP1B3 (see Appendix 3);    5. Any drugs known to cause QTc prolongation or torsades de pointes (see Appendix 4). 7. Subjects requiring strong or moderate CYP3A inhibitors or inducers, OATP1B1/OATP1B3 sensitive substrates, proton pump inhibitors, and systemic glucocorticoids (equivalent to prednisone > 20 mg/day for 3 days or more) during the study (see Appendix 3). 8. Subjects who have received chimeric antigen receptor T cell (CAR-T) therapy within 90 days prior to the planned first dose of the study drug. 9. Subjects who have received an autologous stem cell transplantation within 90 days prior to the planned first dose of the study drug; subjects who have undergone allogeneic stem cell transplantation. 10. Subjects with prior malignancy other than MCL within the past 2 years, with the exception of basal cell carcinoma, carcinoma cervix in situ, breast cancer in situ, and localized squamous cell carcinoma curatively treated, as well as malignancies that have been cured by surgery or other treatment as confirmed by the investigator and the sponsor. 11. Subjects with any serious and/or uncontrolled systemic diseases that are not suitable for participation in this study as judged by the investigator (including hypertensive crisis, diabetic ketoacidosis, unstable angina, congestive cardiac failure, respiratory diseases requiring continuous oxygen inhalation, severe vascular embolism, uncontrolled massive hemorrhage or massive organ hemorrhage, severe liver, kidney or metabolic diseases such as decompensated cirrhosis, nephrotic syndrome, etc.). 12. Subjects with significant abnormalities noted on ECG at screening, mainly including atrial fibrillation/atrial flutter, second-degree atrioventricular block type 2, third-degree atrioventricular block, bradycardia CTCAE grade ≥ 2 and QT interval corrected by Fridericia method (QTcF=QT/(RR^0.33), RR=60/pulse value) (QTcF) ≥ 480 ms, etc. Other abnormalities will be judged by the investigator for suitability for participation in the study. 13. Subjects with poor cardiac function, meeting criteria of New York Heart Association (NYHA) class ≥ 2 (NYHA class 2 is defined as Slight limitation of physical activity. Comfortable at rest. Ordinary physical activity results in fatigue, palpitation, shortness of breath or chest pain); or left ventricular ejection fraction (LVEF) < 50% reflected by cardiac ultrasound. 14. Subjects with a history of cerebral infarction, intracranial hemorrhage, myocardial infarction within 180 days before the planned first dose (except for the subjects with lacunar infarction, which is judged by the investigator to not affect the enrollment in this study). 15. Subjects with any of the following infections, including but not limited to:     1. Human immunodeficiency virus (HIV) infection, syphilis infection (patients with previous infection who were cured as judged by the investigator or specialist can be enrolled), positive HBsAg or HBcAb and HBV-DNA test results greater than the ULN of the study site (if HBsAg or HBcAb is positive and HBV-DNA is negative, it is strongly recommended to perform antiviral prophylaxis after enrollment, and monitor HBV-DNA on a regular basis; if HBV-DNA turns positive during treatment, the study drug should be interrupted, and the study drug should be re-administered after negative results are obtained). HCV antibody positive with HCV-RNA test result higher than the upper limit of normal of the study site or qualitatively positive;     2. Unexplained fever with body temperature higher than 38.5 ºC within one week prior to the initial administration;     3. Uncontrolled systemic active bacterial, fungal, or viral infections. 16. Any condition that affects the drug ingestion of subjects and seriously affects the absorption or pharmacokinetic parameters of the study drug, including uncontrollable nausea and vomiting, as well as short-bowel syndrome, etc.; 17. Presence of conditions that are unfavorable to the administration of the study drug or affect the explanation of drug toxicity or AE; subjects with pre-existing diseases and alcohol or drug abuse/dependence that will result in inadequate compliance with the study. 18. Other conditions that are unsuitable for participation in this trial in the investigator’s opinion. | |
| **Route of administration:** oral | |
| **Dose modification protocol:**  If Grade 4 hematologic toxicity, Grade 3 febrile neutropenia, Grade 3 platelet count decreases in the presence of bleeding, or ≥ Grade 3 non-hematologic toxicity (excluding toxicities that, in the judgment of the investigator, do not affect the subject’s safety) occurs and is considered possibly related, probably related, or related to the study drug, the subject should interrupt the study drug until the toxicity has resolved to ≤ Grade 1 or baseline levels (symptomatic and supportive treatment is allowed for achieving this criterion. For AEs considered to be caused by both the underlying disease and the study drug, the decision on whether to interrupt the study drug and when to resume the study drug may be made after discussion between the investigator and the sponsor’s medical monitor) (For cytopenia meeting the Grade 3 criteria at screening, if the Grade 4 hematologic toxicity criteria are met after treatment, the study drug may be continued after the investigator assesses the risk/benefit ratio of the subject and the sponsor approval is obtained.) The study drug must be permanently discontinued for subjects who do not recover to Grade ≤ 1 or baseline within 28 days (unless the investigator believes that the subject can benefit from continued use of the study drug and the medical approval is obtained from the sponsor). If the above toxicities occur for the first time, the investigator can determine whether the dose of the study drug needs to be modified according to the specific conditions of the subject when the study drug is resumed. However, if the above toxicities occur again after the use of the same dose of the study drug, the dose should be reduced to 125 mg QD. If the same grade of toxicity recurs after a dose reduction, the dose should be reduced to 100 mg QD. If the subject is administrated with 125 mg QD or 100 mg QD for more than 1 cycle and the grade of toxicities does not worsen or further improves, the investigator can decide whether to escalate the dose according to the individual conditions of the subject (but only one dose escalation is allowed for each subject). If the same grade of toxicity recurs after a dose reduction, the study drug must be permanently discontinued (in exceptional cases, treatment may be continued only after discussion between the investigator and the sponsor’s medical monitor). | |
| **Permitted** **Concomitant Medications During the Study:**  Subjects may receive the best supportive care during the study, including hematopoietic growth factors (G-CSF is strongly recommended when ANC is below 0.5 × 109/L), blood transfusion, fluid and electrolyte supplementation, and antiemetic, antidiarrheal, analgesic, and appropriate anti-infective therapies. Potential drug-drug interactions need to be considered when using concomitant medications.  Corticosteroids are allowed to treat complications during the study. If the use of 3 or more consecutive days is required, the dose of prednisone should be ≤ 20 mg/day (or its equivalent). Temporary use of a higher dose of corticosteroids (total daily dose shall be no more than 50 mg prednisone or equivalent glucocorticoids) for 2 consecutive days is allowed. If it is necessary to use glucocorticoids beyond the above standard dose due to the disease, the efficacy analysis of the patient will be handled according to the new anti-cancer treatment. However, if the investigator believes that the subject would benefit from continued treatment with the study drug, continued medication of the study drug as per protocol during and after the period of corticosteroid overdosing may be considered. Safety data from subjects will continue to be collected.  Subjects who require to take H2 blockers (see Appendix 3) are not allowed to take these drugs until 2 h after administration of LP-168.  If the increase of lymphocyte occurs during treatment, the investigator can use leukapheresis as required by the disease condition. | |
| **Prohibited Concomitant Medications and Treatments During the Study:**   - Any study drugs; - Any drugs with anti-cancer indication, including Chinese herbal medicine (but cytarabine, methotrexate, and dexamethasone are allowed for intrathecal injection for prevention of central nervous system lymphoma); - Systemic glucocorticoids exceeded the allowed doses or duration of treatment as mentioned above (equivalent to prednisone at doses > 20 mg/day for 3 or more days; or single daily dose > 50 mg, see above for details); - Radiotherapy for lymphoma - OATP1B1/OATP1B3 sensitive substrates (see Appendix 3); - Proton pump inhibitors (refer to Appendix 3) (if the use of such drugs is required based on the subject's condition and investigator's judgment, the study drug, LP-168, should be interrupted during the medication period. After taking the last dose of proton pump inhibitor, elution is still required for at least 72 h before the study drug can continue to be used.); - Strong and moderate CYP3A4/5 inhibitors and inducers (see Appendix 3); - Any drugs known to cause QTc prolongation or torsades de pointes (see Appendix 4). | |
| **Pharmacokinetic Studies:**  PK intensive sampling is planned in this study: some subjects enrolled in 3 study sites are planned to undergo intensive sampling of plasma samples for pharmacokinetic study. The total number of subjects undergoing PK intensive sampling is not less than 15. Sampling time points: within 1 h before administration on the day of C1D15 (± 1 day) visit (or 24 h ± 30 min after administration on the day before this visit, whichever comes first), and 0.5 h ± 3 min, 1 h ± 5 min, 2 h ± 5 min, 3 h ± 5 min, 4 h ± 5 min, 6 h ± 5 min, 8 h ± 10 min and 24 h ± 30 min after administration on the day of C1D15 (± 1 day) visit (to be collected before administration on C1D16). Subjects who undergo PK intensive sampling will not undergo PK sparse sampling on C1D15, but will still be required to undergo PK sparse sampling on C1D28 and thereafter. PK sparse sampling: All subjects enrolled in this study are required to undergo sparse sampling of plasma samples at the time points pre-specified in the protocol for population pharmacokinetic study. Sampling time points: within 1 h before administration (or 24 h ± 30 min after administration on the day before the visit, whichever comes first) and 2 h ± 10 min after administration on C1D15 (± 1 day), C1D28 (± 1 day), C2D28 (± 3 days), C3D28 (± 3 days) and C4D28 (± 3 days). In case of dose interruption or misadministration, PK blood sampling is allowed to be postponed or cancelled. | |
| **Criteria for Discontinuation of Treatment for Subjects:**  1. The subject or his/her legal guardian requests to withdraw from the study, e.g., the subject requests to withdraw from the study due to intolerable AEs;  2. The investigator determines that the study treatment should be terminated in the best interests of the subject;  3. There is evidence to indicate disease progression;  4. The subject is pregnant during the study;  5. The investigator and/or sponsor believes that the subject has poor compliance;  6. Other anti-cancer therapies are adopted, including stem cell transplantation;  7. The subject is lost to follow-up;  8. The subject has died. | |
| **Study Duration :**  The expected duration of this study is 3 years. Subjects may take the study drug until disease progression or relapse, unacceptable toxicity, or treatment discontinuation criteria are met at the discretion of the sponsor. After the study, subjects who remain on treatment may join another long-term follow-up study and receive treatment from the sponsor to ensure that subjects can take LP-168 until disease progression or unacceptable toxicity. | |
| **Response Evaluation Criteria:**  The 2014 Lugano Response Evaluation Criteria for Non-Hodgkin's Lymphoma (NHL) is provided in the Appendix. | |
| **Sample Size:**  This study uses a single-group target value design to assess whether the IRC-assessed ORR (π) of LP-168 monotherapy in subjects with R/R MCL is superior to the set target value (π0). The statistical hypotheses are as follows:   - H0: π ≤ π0 - H1: π > π0   The target value is obtained based on previous treatment efficacy or clinical experience data of the indicated population. A study with a sample size of 31 patients showed an ORR of 32% for salvage chemotherapy in R/R MCL patients receiving 2 prior lines of therapy (including BTK inhibitors), and another study with a sample size of 58 patients showed an ORR of 29% for lenalidomide-based therapy in R/R MCL patients receiving 4 prior lines of therapy (including BTK inhibitors). The ORR for the above two studies combined was 30%. Therefore, 30% was selected as the ORR target value in this study. Assuming that the study drug can improve the ORR to 50% and the type I error is controlled within 2.5% (one-sided test), 55 subjects can provide a power of not less than 85% to demonstrate that the ORR of LP-168 is superior to the target value 30%. Considering a dropout rate of approximately 10%, 62 subjects are planned to be enrolled. | |
| **Statistical Methods:**  After the study protocol is determined, the statistical professionals are responsible for negotiation with the principal investigator to formulate the statistical analysis plan. Statistical analysis will be performed using SAS statistical software (version 9.4 or above). The measurement data are described with the number of subjects, mean, standard deviation, median, maximum, and minimum. Enumeration data or grade data are expressed as frequency and percentage. Data used in general statistical tables will be presented in a list. A two-sided test with a significance level of α = 0.05 is used for all statistical tests. Missing data will not be filled.  **Efficacy Analysis:**  The estimated target analysis will be conducted based on the target population (FAS), while the additional analysis will be performed based on the PPS population. The following efficacy parameters are evaluated:  Overall response rate (ORR): the number and percentage of (CR + PR) will be calculated, and 95% confidence interval of ORR will be calculated based on binomial distribution.  For time to response (TTR), duration of response (DOR), progression-free survival (PFS), and overall survival (OS), the median survival times, Q1 and Q3, and their 95% confidence intervals will be estimated using the Kaplan-Meier method. Additionally, the 1-year and 2-year progression-free rates, survival rates, and their corresponding 95% confidence intervals will be estimated.  **Safety Analysis:**  The safety analysis population included all subjects who have received at least one dose of LP-168.  For physical examination, 12-lead ECG, laboratory test indicators (hematology, urinalysis, blood biochemistry, coagulation function, etc.), all completed test items and descriptive statistics will be listed in a cross-tabulation format (as judged by the clinician) before and after treatment. A list of abnormal findings from ECGs, physical examinations, and laboratory tests at each time point will also be provided. Vital signs (blood pressure, temperature, pulse, respiration, etc.) will be described, including the values at each time point and their changes relative to baseline.  Adverse events, investigational drug-related adverse events, serious adverse events, and events leading to discontinuation will be summarized by the number of subjects and incidence rates. According to the CTCAE 5.0 standard levels, the incidence rates of all adverse events and adverse events related to investigational drugs will be summarized, and the incidence rates of adverse events grades 3 or higher related to investigational drugs will be highlighted. The types of adverse events and their relationship to the investigational drug will be described in a listing. A summary of all adverse events, investigational drug-related adverse events, adverse events leading to discontinuation, and serious adverse events will be provided.  **Quality of Life Score:**  The scores for each item of the EORTC QLQ-C30 at each time point and their changes from baseline will be summarized. Descriptive statistics will include the number of non-missing cases, mean, standard deviation, median, and range.  **Pharmacokinetic Studies:**  The drug concentration-time data of each subject will be summarized, and concentration-time curves will be plotted for intensive sampling data, along with mean plasma concentration-time curves. PK parameters are also calculated. If the data are applicable, a population PK analysis is planned to be conducted through dense and/or sparse sampling data to explore the population characteristics of exposure parameters and related influencing factors. | |
| **Study Protocol Amendment:**  The study protocol No. is LP-168-CN201, version No. is 1.1, version date is October 10, 2023.  Necessary amendments to the protocol will be made based on the efficacy, safety, tolerability, human PK parameters, and the specific implementation of the study. All amendments to the study protocol must be approved by the sponsor, the investigator and the Ethics Committee at least before implementation. | |

**This study will be carried out in accordance with the current standard of Good Clinical Practice (GCP)**

# Study Flow Chart

| **Study Procedure** | **Screening Phase a** | | **Cycle 1** | | | | **Cycle 2-8** | **Every 3 cycles after Cycle 8** | **End of Treatment Visit aa** | **Safety Follow-up bb** | **Disease Follow-up cc** | **Survival Follow-up dd** |
| --- | --- | --- | --- | --- | --- | --- | --- | --- | --- | --- | --- | --- |
| **Time** | **D-28**- | **D-1** | **D1** | **D8 + 1** | **D15 + 1** | **D28 + 1** | **D28 + 3** | **D28 + 3** | **Within 7 Days after Last Administration** | **28 +7 Days after Last Administration** | **Every 12 Weeks ± 7 Days** | **Every 12 Weeks ± 7 Days** |
| Informed consent | X |  |  |  |  |  |  |  |  |  |  |  |
| Confirm eligibility | X | X |  |  |  |  |  |  |  |  |  |  |
| Demographics/medical history/ treatment history b | X |  |  |  |  |  |  |  |  |  |  |  |
| Concomitant medication assessment c | X | X | X | X | X | X | X | X | X | X |  |  |
| Safety assessment c |  |  | X | X | X | X | X | X | X | X |  |  |
| Physical examination d | X | X | X | X | X | X | X | X | X | X | X |  |
| Vital signs e | X | X | X | X | X | X | X | X | X | X |  |  |
| ECOG PS | X |  |  |  |  | X | X | X | X | X |  |  |
| B symptoms f | X |  |  |  |  |  |  |  |  |  |  |  |
| IPI score | X |  |  |  |  |  |  |  |  |  |  |  |
| MIPI score | X |  |  |  |  |  |  |  |  |  |  |  |
| Ann Arbor staging f | X |  |  |  |  |  |  |  |  |  |  |  |
|  | **Local laboratory/relevant departments** | | | | | | | | | | | |
| Hematology g | X | X |  | X | X | X | X | X | X | X |  |  |
| Blood biochemistry (including LDH) g | X | X |  | X | X | X | X | X | X | X |  |  |
| Serum amylase and lipase g | X |  |  |  |  |  |  |  |  |  |  |  |
| Coagulation function g | X |  |  |  |  | X | X | X | X | X |  |  |
| Blood β2 microglobulin | X |  |  |  |  |  |  |  |  |  |  |  |
| Viral testing h | X |  |  |  |  |  |  |  |  |  |  |  |
| HBV-DNA and/or HCV-RNA h | （X） |  |  |  |  |  | (X) | (X) | （X） | （X） |  |  |
| Urinalysis g | X | X | X | X | X | X | X | X | X | X |  |  |
| Stool routine + occult blood | X |  |  |  |  |  |  |  |  |  |  |  |
| Quantitative blood immunoglobulin i | X |  |  |  |  |  |  |  |  |  |  |  |
| Serum/urine pregnancy test (females of childbearing potential) j | X | (X) |  |  |  | X | X | X | X | X |  |  |
| 12-lead ECG K | X | X | X | X | X | X | X | X | X | X |  |  |
| Echocardiogram l | X |  |  |  |  |  |  |  |  |  |  |  |
| FDG PET/CT m | X |  |  |  |  |  | (X)  (even cycles D21-28) | (X) |  |  | (X) |  |
| Contrast-enhanced CT (neck, chest, abdomen, and pelvis) n | X |  |  |  |  |  | X  (even cycles D21-28) | X |  |  | X |  |
| Head MRI o | （X） |  |  |  |  |  | (X) | (X) |  |  | (X) |  |
| Gastrointestinal endoscopy p | （X） |  |  |  |  |  | (X)  (when considering CR) | (X)  (when considering CR) |  |  | （X） |  |
| **Central Laboratory** | | | | | | | | | | | | |
| Bone marrow biopsy q | X |  |  |  |  |  | (X)  (when considering CR) | (X)  (when considering CR) |  |  | （X） |  |
| FISH 17p-detection r | （X） |  |  |  |  |  |  |  |  |  |  |  |
| NGS testing r | （X） |  |  |  |  |  | (X) | （X） |  |  |  |  |
| Pathology and immunohistochemistry r | X |  |  |  |  |  |  |  |  |  |  |  |
| TP53 mutation s | （X） |  |  |  |  |  |  |  |  |  |  |  |
| PK blood sample collection t |  |  |  |  | X | X | X |  |  |  |  |  |
|  | Other | | | | | | | | | | | |
| Efficacy evaluation | X |  |  |  |  |  | X  (even cycles) | X |  |  | X |  |
| EORTC QLQ-C30 assessment |  | X | X |  |  | X | X | X | X | X | X |  |
| Dispensation of the study drug |  |  | X |  |  | X | X | X |  |  |  |  |
| Recovery of the study drug |  |  |  |  |  | X | X | X | X |  |  |  |
| Distribution of diary card |  |  | X |  |  | X | X | X |  |  |  |  |
| Collection of diary card |  |  |  |  |  | X | X | X | X |  |  |  |
| Survival assessment |  |  |  |  |  |  |  |  |  |  |  | X |
| Collection of information on subsequent anti-cancer therapy |  |  |  |  |  |  |  |  |  |  |  | X |

D = Day; (X) = Examinations will only be performed in some specific subjects or visits, see comments for details.

1. Screening examinations should be completed within 28 days unless otherwise specified.
2. The tumor history should be collected, including but not limited to the time of initial diagnosis, MCL histology (classic, pleomorphic, blastoid), key biomarker test results [ CD20, CD5, cyclin D1, CD21, CD23, SOX11, Ki-67, BCL-2, BCL-6, CD10, TP53 mutation or deletion status, IGHV mutation, t (11, 14), CD200, LEF1], Ann Arbor staging at the time of first diagnosis, MIPI score, IPI score, prior therapeutic regimens, number of prior treatment lines, best response achieved in each line and corresponding timing, start and end dates of each treatment line, reasons for treatment discontinuation, disease progression time, and whether central nervous system, bone marrow, or gastrointestinal involvement occurred.
3. Data on concomitant medications, including drug name, dose, route of administration, frequency of administration, start date, reason for medication, and end date, are collected from signing of informed consent until Day 28 after the last administration. The treating physician gets the information from each follow-up of the patient. By understanding routinely prescribed drugs for the patient, the treating physician will evaluate whether it may lead to symptom improvement with clinical significance based on changes in the subject’s concomitant medication over the past period. The collection of adverse events begins when the subject receives the study drug. If it is a serious adverse event, the investigator should report it to the sponsor within 24 hours of awareness and follow up until resolution. Serious adverse events that meet the definition of SUSAR are subject to expedited reporting by the sponsor to regulatory authorities within the specified timeframe.
4. Physical examination should include at least weight measurement and assessments of skin, eyes, ears, nose, throat, oral cavity, Waldeyer’s ring, lungs, heart, abdomen, extremities, musculoskeletal system, nerves, thyroid, superficial lymph nodes, and general appearance. Height measurement is only performed during the screening period.
5. Vital signs (measured after resting for at least 5 minutes) include pulse, blood pressure, respiration, and body temperature. Assessments should be conducted at specified time points (within 2 hours before and 2-4 hours after administration) on C1D1 and C1D15 (+1 day), and for other follow-up visits, vital signs should be assessed within 2 hours before administration.
6. The presence or absence of B symptoms at enrollment, the type of B symptoms (fever, night sweats and/or weight decreased) and the degree of B symptoms (such as the highest temperature in recent days, the duration of fever, the amount of described night sweats, the amount of weight decreased in recent half a year, etc.) will be recorded. Baseline Ann Arbor staging is recommended to be assessed in combination with PET/CT (if PET/CT sensitive) and CT results.
7. Hematology, blood chemistry and urinalysis on D-1 can also be performed before C1D1 administration, and hematology and blood chemistry results must meet the eligibility criteria before C1D1 administration. **Urinalysis on C1D1 will be performed 4-8 hours after administration.** Other tests are sampled before administration on each scheduled visit day. If the investigator determines no safety risk based on the patient's general condition, the administration of the study drug for that day can commence without waiting for test results.
8. Including hepatitis B surface antigen (HBsAg), hepatitis B surface antibody (HBsAb), hepatitis B core antibody (HBcAb), hepatitis B e antigen (HBeAg), hepatitis B e antibody (HBeAb), HIV, syphilis, and hepatitis C antibody. HBV-DNA should be tested for subjects with positive HBsAg or positive HBcAb, and re-examined every 2-3 cycles after enrollment. For subjects with positive hepatitis C antibody, HCV-RNA should be tested at baseline. If the subject has received systemic anti-hepatitis C treatment and has been cured, hepatitis C can be tested at irregular intervals at the discretion of the investigator. If the subject has not received systemic anti-hepatitis C treatment, it is recommended to monitor HCV-RNA regularly, once every 2-3 cycles. If HBV-DNA/HCV-RNA is positive during treatment, the study drug should be interrupted. The treatment with the study drug can only be resumed after receiving anti HBV or HCV treatment and testing negative or returning to normal levels.
9. The blood immunoglobulin test includes IgG, IgM and IgA.
10. Applicable only to females of childbearing potential. A serum pregnancy test will be performed at screening. If the test is performed more than 7 days after the initial administration, a serum or urine pregnancy test will be performed again, and only those who are negative can be enrolled. Serum or urine pregnancy test will be performed at the end of each cycle after enrollment. For subjects with continuous amenorrhea for at least 1 year during the study and confirmed as menopausal by a specialist/investigator, pregnancy testing can be discontinued.
11. During the screening period, on D-1 (or before C1D1 administration), and on C1D8 (±1), C1D15 (±1), and C1D28 (±1) before administration, 12-lead ECGs should be performed (or when clinically indicated). Each assessment should occur after at least 10 minutes of rest. ECGs should be repeated three times, with at least 5 minutes between each measurement, to obtain an average corrected QT interval result. **Additionally, ECGs should be conducted 2-4 hours after administration on C1D1 and C1D15 (±1).** Before the examination, the subject should rest for at least 10 minutes and be subjected to three repetitions, with at least a 5-minute interval between each.The 12-lead ECG will be performed on D28 ± 2 days of C2 and later specified cycles (or as clinically indicated), with at least 10 minutes of rest prior to each examination and one examination. If there is QT interval prolongation, it is necessary to perform two more examinations. Then the mean value of QTcF of the three examinations will be calculated as the QTcF value at this visit.
12. Echocardiogram must include left ventricular ejection fraction. It must be checked during the screening period and may be performed thereafter as clinically indicated at the discretion of the investigator.
13. During the screening period, positron-emission tomography (PET)/CT scan are conducted for all subjects. If the target lesion is sensitive to PET/CT (Deauville 5-point score ≥4), subsequent evaluations of efficacy will also use PET/CT. For subjects who achieve CMR, subsequent assessments can be made solely through enhanced CT (or MRI) until disease progression is considered. If the lesions are not sensitive to PET/CT, the continuation of PET/CT assessments will be at the discretion of the investigator. If the scheduled efficacy evaluation is less than 1 treatment cycle from the last additional imaging examination, the scheduled efficacy evaluation may be skipped and the imaging examination may be performed at the next scheduled efficacy evaluation at the discretion of the investigator. During the screening period, if PET/CT conducted at the study site following the last anti-MCL treatment is within 28 days before the initial administration of the study, and is considered by the investigator and sponsor to meet the criteria, it can serve as the baseline data for this study, and there is no need to repeat the examination.
14. If there is no contraindication, enhanced CT examination is required at screening and during the trial to evaluate the efficacy. If the patient has special circumstances such as allergy to contrast medium, CT plain scan, enhanced MRI or MRI plain scan may be considered for examination, but the same radiological examination is required to be used for each efficacy evaluation of the same subject. At screening and during the study, the investigator may perform imaging assessment at additional time points or sites as clinically indicated based on the subject's specific conditions. If the scheduled efficacy evaluation is less than 1 treatment cycle from the last additional imaging examination, the scheduled efficacy evaluation may be skipped and the imaging examination may be performed at the next scheduled efficacy evaluation at the discretion of the investigator. During the screening period, the imaging examination conducted at the study site following the last anti-MCL treatment is within 28 days before the initial administration of the study, and is considered by the investigator to meet the criteria, it can serve as the baseline data for this study, and there is no need to repeat the examination.
15. During the screening period, for patients suspected of having lymphoma involving the CNS, a head-enhanced MRI is required. If the subject is allergic to the contrast medium or has contraindications for MRI, MRI plain scan, enhanced CT, or CT plain scan may be attempted. If CNS lymphoma is considered by imaging at screening, it will not be enrolled. Additional MRI (or CT) may be performed if CNS involvement is suspected during the study.
16. Gastrointestinal endoscopy should be recommended (not mandatory) for all subjects at screening. Patients with suspected gastrointestinal involvement based on baseline imaging and/or endoscopy are required to undergo endoscopy (including pathology) to confirm complete response (CR) when imaging suggests CR, but repeat endoscopy is not necessary for confirmation. Once CR is confirmed upon efficacy assessment, subsequent examinations are not required unless deemed necessary by the investigator. Subjects without evidence of gastrointestinal involvement at baseline do not require endoscopy for CR assessment. During the screening, if the endoscopy conducted at the study site following the last anti-MCL treatment is within 28 days before the initial administration of the study, and is considered by the investigator and sponsor to meet the criteria, it can serve as the baseline data for this study, and there is no need to repeat the examination. Additional gastrointestinal endoscopy may be performed if clinically indicated during the trial. If involvement of other parts of the gastrointestinal tract is suspected, examinations such as gastroscopy or enteroscopy may be considered based on the condition. If involvement is confirmed, endoscopy is required to confirm CR during CR assessment, but consecutive endoscopies are not necessary for confirmation.
17. Bone marrow biopsy should be performed during the screening period to assess for bone marrow involvement by lymphoma, which cannot be replaced by bone marrow aspirate. Immunohistochemistry is required to confirm lymphoma involvement when considering it based on bone marrow biopsy morphology. For subjects with bone marrow involvement at baseline, a bone marrow biopsy is required to confirm CR when disease is considered to be in CR. For subjects without bone marrow involvement at baseline, confirmation of a bone marrow biopsy may not be required for the assessment of CR. Subjects with negative initial bone marrow biopsy results for CR assessment do not require repeat bone marrow biopsy for confirmation. Bone marrow aspirate smears are optional and may be tested according to clinical practice at each site. If the results of bone marrow biopsy and bone marrow smear are inconsistent, the investigator/IRC can judge whether there is bone marrow involvement. If the bone marrow examination performed at the study site after the last anti-MCL therapy is performed within 60 days of the initial administration of the study, and is determined to be satisfactory by the investigator and the sponsor, the above-mentioned satisfactory bone marrow tissue sample can be sent to the central laboratory for re-testing and used as the baseline data of the study without repeat aspiration.
18. Testing should be performed on lymphoma tissue or peripheral blood/bone marrow containing obvious lymphoma cells If the subject's previous pathological diagnosis is unknown or doubtful, the pathological diagnosis should be confirmed at baseline, and lymphoma tissues or cells at baseline should be used for detection as far as possible. If unavailable, previously unstained lymphoma tissue sections can be used for testing. If the test results are inconsistent with the previous results, the test results from the central laboratory at screening will prevail. Enrolled subjects must provide adequate neoplasm tissue blocks or sections [either of the following conditions: 1. Unstained sections meeting the criteria of the central laboratory (expected to be at least 5 sections) and a complete set of previously stained sections; 2. Unstained sections meeting the criteria of the central laboratory for confirmed diagnosis] for the approval of pathological diagnosis by the central laboratory. Patients voluntarily choose NGS testing, including but not limited to TP53, IGHV, BTK, etc. After treatment, in case of disease progression, NGS re-testing should be performed in post-progression neoplasm tissue or peripheral blood/bone marrow containing obvious lymphoma cells as far as possible. Subjects whose chromosome 17p status remains indeterminate, and who have not been treated with anti-CD20 antibodies, are required to undergo del(17p) and/or TP53 mutation testing (excluding patients who are not eligible for CD20 antibody immunochemotherapy, as detailed in the text).
19. TP53 mutation testing and/or del (17p) testing (excluding patients who are not eligible for CD20 antibody immunochemotherapy, as detailed in the text) must be performed in subjects with indeterminate TP53 status who have not been treated with anti-CD20 antibodies, and TP53 mutation will be determined using the sanger method (or NGS).
20. All subjects will have PK blood samples collected within 1 h before administration (or 24 h ± 30 min after administration on the day prior to the visit, whichever comes first) and 2 h ± 10 min after administration on C1D28 (± 1 day), C2D28 (± 3 days), C3D28 (± 3 days) and C4D28 (± 3 days). For intensive PK sampling: within 1 h before administration on C1D15 (± 1 day) (or 24 h ± 30 min after administration on the day before this visit, whichever comes first), and at 0.5 h ± 3 min, 1 h ± 5 min, 2 h ± 5 min, 3 h ± 5 min, 4 h ± 5 min, 6 h ± 5 min, 8 h ± 10 min and 24 h ± 30 min after administration on C1D15 (± 1 day) (to be collected before administration on C1D16). Sparse PK sampling on C1D15 will not be performed for subjects who undergo PK intensive sampling. In case of sparse PK sampling, PK blood samples will be collected within 1 h before administration (or 24 h ± 30 min after administration on the day prior to the day of the visit, whichever comes first) and 2 h ± 10 min after administration on C1D15 (± 1 day).

aa. The end of treatment visit should be performed within 7 days after the last administration for reasons other than death, loss to follow-up, or complete withdrawal of informed consent. Subjects who are determined to have stopped treatment due to disease progression at scheduled visit times do not need to undergo repeated examinations.

bb. This visit is to be completed 28 days (+7 days) after the subject's last administration or prior to the start of a new antineoplastic regimen (telephone follow-up is acceptable if the Safety Visit is no more than 7 days from the EOT Visit), unless subject refuses, dies, is lost to follow-up, or withdraws consent. Upon end of treatment with the study drug, all pre-existing or new AEs or SAEs occurring within 28 days after the last administration should be followed up until resolution, stabilization/return to baseline, unless considered by the investigator unlikely to be resolved due to the subject's own disease.

1. Any subject who withdraws from study treatment for reasons other than disease progression/relapse (except for complete withdrawal of informed consent, loss to follow-up, death of the subject) is encouraged to continue neoplasm assessment every 12 weeks (± 7 days) until disease progression or relapse, death, withdrawal of informed consent, loss to follow-up, or other anti-neoplasm therapy (whichever occurs first).
2. It is recommended to contact the subject, the subject's family or the subject's current treating physician by telephone every 12 weeks (± 7 days) to obtain the relevant data of overall survival and antineoplastic treatment after the study until the subject dies, refuses to follow-up or is lost to follow-up. The following information should be obtained at each follow-up: survival status, documentation of all anti-lymphoma treatments and date of death, cause of death (if applicable).

Note: (X) represents that it can be performed optionally or under specific conditions. The safety test results from other hospitals are accepted in this study.

1. **Overview**

**1.1 Background of Mantle Cell Lymphoma**

Mantle cell lymphoma (MCL) is a relatively rare subtype of Non-Hodgkin's lymphoma (NHL), but it carries a severe clinical course and poor prognosis, with nearly all patients deemed incurable post-diagnosis. MCL accounts for approximately 3% to 10% of adult NHL and the incidence shows an increasing trend over the years [1-3]. The incidence of MCL is slightly lower in Asian countries than in Western countries, but the median age of onset is lower in Asian countries than in Western countries [4-5]. MCL primarily affects the elderly, with a median age at diagnosis ranging from 60 to 70 years, and males represent 70% of cases. More than 80% of patients had stage 3 or 4 lesions at the time of diagnosis; Most patients with MCL present with non-localized, palpable lymphadenopathy with or without constitutional symptoms.

The precise pathogenesis of MCL remains unclear. It involves the immunoglobulin heavy chain gene, which is perpetually active in mature peripheral B cells. The hallmark change in MCL, t(11; 14)(q13; q32), leads to the expression of cyclin D1 being transcriptionally regulated by the immunoglobulin heavy chain gene, causing cyclin D1 to be overexpressed in nearly all MCL cases. Furthermore, the universal overexpression of SOX-11 and Bcl-2 also contributes to the survival and proliferation of the neoplasm cells. Meanwhile, genes that inhibit proliferation are lost, such as TP53, CDKN2A, and ATM. Genes that promote proliferation gain an amplification advantage, such as MYC and NOTCH. This series of mutations benefits MCL cell proliferation and also affects the response of MCL cells to anti-neoplasm therapy. In a very few special cases of MCL, cyclin D1 is not expressed. However, they are still affected by chromosomal translocations, and instead, expressions of cyclin D2, D3, or E are observed. These neoplasms also commonly express SOX-11. It is commonly believed that the tumor development and characteristics of cyclin D1-negative MCL do not differ significantly from those of cyclin D1-positive MCL.

For a long time, traditional chemotherapy regimens, with or without rituximab, were the standard treatment for patients with MCL. First-line treatment can achieve an overall response rate (ORR) of about 90%, a complete response (CR) rate of 30%-50%, and a median progression-free survival (PFS) of about 30 months [6-8]. However, patients will relapse eventually. Once relapsed, the prognosis is poor, and the more relapse episodes and treatment lines, the shorter the duration of response and survival after each subsequent treatment. Post-relapse second-line treatments include salvage immunotherapy, where the bendamustin, rituximab and cytarabine combination regimen (R-BAC) has shown superiority in terms of efficacy [9]. However, half of the patients experienced grade 3 or 4 toxicities, particularly thrombocytopenia, raising concerns about clinical safety and tolerability. At the same time, novel therapies are continuously being explored, such as the proteasome inhibitor “bortezomib” and the immunomodulatory drug “lenalidomide,” with single-drug efficacy ORRs of 33% and 35%, respectively, and CR rates close to 10%. The median TTP for bortezomib is 6.7 months [10], and the median PFS for lenalidomide is 8.7 months [11, 12]. The efficacy of single-drug treatment is limited, and the combination of CD20 monoclonal antibody and/or chemotherapy improves efficacy but also increases adverse reactions, which is not conducive to long-term medication for patients. The emergence of Bruton’s tyrosine kinase (BTK) inhibitors has greatly improved the efficacy for R/R MCL patients and made long-term safe medication possible.

Therefore, small molecule targeted therapy for BTK has become a research focus in this field. Ibrutinib is the first approved BTK inhibitor. Ibrutinib has shown significant efficacy in numerous clinical applications, with a single-drug ORR of approximately 70% and a CR rate of 20% in R/R MCL patients, and a median PFS of about 14 months [13, 14]. However, due to off-target effects, such as inhibition of other tyrosine kinases [such as epidermal growth factor receptor (EGFR), interleukin-2-induced T-cell kinase (ITK) and TEC], it has been associated with various observed clinical toxicities (e.g., cardiovascular toxicity, bleeding). In the confirmatory study (SHINE) of Ibrutinib combined with bendamustine and rituximab (BR) treatment for first-line (1L) MCL, compared to BR, Ibrutinib combined with BR did not show improvement in terms of OS, and its safety was relatively worse than the control group. In 2023, the sponsor proactively withdrew the MCL indication for Ibrutinib in the United States. The design purpose of the second-generation BTK inhibitors is to reduce off-target effects, thereby improving efficacy and tolerability. To date, the second-generation BTK inhibitors approved for marketing in patients with R/R MCL include Acalabrutinib [16], Zanubrutinib [17], and Orelabrutinib. As shown in clinical trial data, these second-generation BTK inhibitors have a reduced incidence of off-target toxicity, such as haemorrhage, atrial fibrillation, hypertension, diarrhea, fatigue, nausea, and other general toxic reactions, compared to Ibrutinib. However, the MCL indications for these three drugs are all based on single-arm studies with conditional approval, and their efficacy and safety in treating MCL are yet to be further clarified by large-sample randomized controlled studies. On the other hand, although the first and second-generation BTK inhibitors have encouraging clinical efficacy in various B-cell lymphomas, long-term clinical application leads to the development of acquired drug-resistance [18]. The currently recognized possible mechanisms of resistance [19, 20] in MCL include the activation of parallel pathways to BTK in MCL cells, mutations in the PLCγ2 gene, and mutations at the BTK C481 site, which result in the inability of first and second-generation covalent BTK inhibitors to bind to this site. Among them, non-covalent inhibitors such as LOXO-305, based on the C481 drug resistance mutation, still show good efficacy after resistance to covalent BTK inhibitors, with an ORR of 50% and a CR rate of 13% in 120 R/R MCL subjects who had received covalent BTK inhibitors [21]. This drug has been approved by the FDA for the treatment of R/R MCL patients who have received two lines of treatment, including a BTK inhibitor. However, this indication is based on conditional approval from single-arm studies, and its efficacy has not yet been confirmed by clinical data from large-sample randomized controlled studies [22-24].

In China, zanubrutinib and orelabrutinib have been conditionally approved, and acalabrutinib has just been approved this year, but the specific details of the approval have not yet been seen, and it is speculated to also be conditionally approved. Therefore, new agents remain to be developed for relapsed/refractory MCL. Globally, only LOXO-305 has been conditionally approved in the United States for the treatment of R/R MCL after BTK inhibitor therapy, which cannot meet the clinical needs of all patients, let alone be a treatment drug accessible in China. Therefore, an oral BTK inhibitor that is safe, effective, highly selective, and combines the characteristics of the first, second, and new generation BTK inhibitors (i.e., it can covalently and irreversibly inhibit wild-type BTK, as well as non-covalently and reversibly inhibit BTK with the C481 mutation) will become an urgently needed product to fill this clinical gap.

**1.2 Development Background and Drug Introduction of BTK Inhibitors**

The activation of the B-cell receptor (BCR) signaling pathway is essential for the development and maturation of B cells [25, 26] as well as the survival of various B-cell lymphomas, such as diffuse large B-cell lymphoma (DLBCL) [27], marginal zone lymphoma (MZL) [28], mantle cell lymphoma (MCL), follicular lymphoma (FL) [29], and Burkitt lymphoma (BL) [30] (Figure 1). The BCR is composed of antigen-binding immunoglobulin heavy chains (IgH) and light chains (IgL) that are coupled with the heterodimer CD79a and CD79b, which contain tyrosine-based activation motifs [31]. The BCR triggers the phosphorylation of tyrosine in the immunoreceptor tyrosine-based activation motifs (ITAM) of CD79a and CD79b by Src family tyrosine kinases (SFK) through antigen crosslinking [31]. The phosphorylated ITAM serves as a scaffold platform for the recruitment and activation of kinases with Src homology 2 (SH2) domains, such as spleen tyrosine kinase (SYK). The activated SYK phosphorylates the B-cell linker protein (BLNK), further recruiting Bruton’s Tyrosine Kinase (BTK) and phospholipase C-γ2 (PLC-γ2) through its SH2 domain. BTK is then phosphorylated and activated by SYK to drive the activation of downstream signaling pathways, such as phosphoinositide 3-kinase (PI3K)/protein kinase B (Akt) and nuclear factor kappa-light-chain-enhancer of activated B cells (NF-κB) [32]. The complex of caspase recruitment domain family member 11 (CARD11), mucosa-associated lymphoid tissue lymphoma translocation protein 1 (MALT1), and B-cell lymphoma/leukemia 10 (BCL10) is an essential component in activating the NF-κB pathway. Additionally, the phosphorylation of the BCR receptor CD19 also recruits PI3K, generating phosphatidylinositol 3,4,5-trisphosphate (PIP3), which is involved in the recruitment and activation of BTK [33]. The BCR signaling pathway provides numerous therapeutic targets, such as SYK, BTK, and PI3K, with drugs targeting these targets either on the market, under development, or in clinical trials to evaluate their efficacy against various B-cell lymphomas.

| 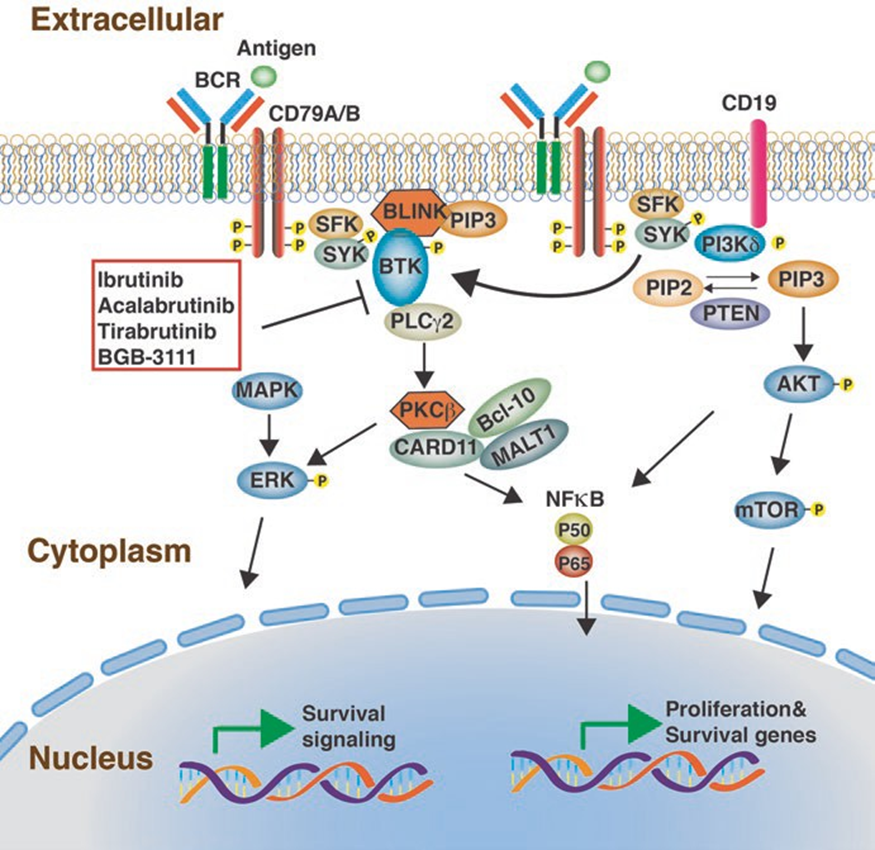 |
| --- |
| Figure 1. Simplified B-cell receptor signaling. The BCR consists of antigen-binding immunoglobulin heavy chains (IgH) and light chains (IgL) that are coupled with the heterodimeric proteins CD79a and CD79b. Binding of an antigen triggers the phosphorylation of tyrosine in the ITAMs of CD79a and CD79b by SFKs. Phosphorylated ITAM recruits SYK, which then activates BLNK, BTK, and PLC γ 2. BTK is then phosphorylated and activated by Syk to drive the activation of PKCβ, PI3K/Akt/mTOR, and NF-κB. PKCβ phosphorylates and activates ERK and NF-κB transcription factors. BTK inhibitors such as Ibrutinib, Acalabrutinib, Tirabrutinib, Spebrutinib, and BGB-3111 inhibit the activity of BTK. A complex of CARD11, MALT1, and BCL-10 is an essential component in activating the NF-κB pathway. Additionally, the phosphorylation of the BCR receptor CD19 also participates in the recruitment and activation of BTK by generating PIP3 and activating the PI3K–AKT pathway through the recruitment of PI3K. The activated ERK, PI3K/Akt/mTOR, and NF-κB pathways upregulate genes involved in the proliferation and survival of B-cell lymphoma cells. |

BTK is a member of the Tec family of non-receptor tyrosine kinases in the cytoplasm, which was discovered in 1993 by researchers studying the genes related to X-linked agammaglobulinemia (XLA) [34, 35]. The gene encodes a protein of 659 amino acids, which is composed of several presumed structural domains: the N-terminal Pleckstrin homology (PH) domain that binds to membrane PIP3, the SH2 domain, the Src homology 3 (SH3) domain, and the proline-rich domain, all of which have regulatory roles in interactions with other cellular signaling pathways [36]. The activation of BTK is associated with increased phosphorylation of two regulatory BTK tyrosine residues, Y551 and Y223 [37]. Y551 in the Src kinase domain is phosphorylated by Syk or Lyn kinase during BCR signal transduction, enhancing the catalytic activity of BTK. Y223 is an autophosphorylation site within the BTK SH3 domain, whose phosphorylation has little effect on the catalytic activity of BTK *in vitro*/*vivo*, but may be a mechanism for modifying protein-protein interactions [37]. BTK has been extensively characterized as a key mediator of signaling through the BCR and Fcγ receptor (FcγR), essential for the development, differentiation, proliferation, and survival of B cells [38, 39]. Studies have shown that in-frame insertion of the reporter gene lacZ in mouse embryonic stem cells leads to inactivation of the BTK gene, resulting in defects in B cell differentiation and maturation. This defect occurs during the development of precursor B cells in the bone marrow into immature B cells, as well as during the development of B cells in peripheral blood from IgD (low) IgM (high) to IgD (high) IgM (low) stages, causing a cessation of B cell maturation [40]. In humans, extensive loss-of-function mutations in BTK (such as mutations in the PH domain of the BTK gene) result in almost complete absence of peripheral B cells and antibodies in XLA patients [41, 42].

BTK is a regulator of normal B-cell development and is activated upon BCR stimulation. The activation of the BCR signaling pathway has become a major route for promoting the growth and survival of both normal and malignant B cells. Antigen activation of the dimeric membrane immunoglobulin B-cell receptor can induce the phosphorylation and activation of BTK and PLCγ2, leading to the activation of many signaling pathways, including mitogen-activated protein kinase (MAPK), NF-κB, and Akt [43] (Figure 1). The activation of BTK is crucial for the survival and proliferation of malignant B-cell neoplasms and their interactions with cells in the tumor microenvironment. MCL is characterized by the malignant transformation of mantle zone B lymphocytes surrounding the germinal center, and the transformation mechanism is significantly related to abnormalities in the BCR pathway. Overexpression of cyclin D1 and SOX11 are characteristic changes in the majority of MCL patients, which are also related to the abnormal proliferation of MCL, higher genetic instability, and a more aggressive clinical course. Primitive MCL cells exhibit strong expression of BTK and phosphorylation at Y223 [44], along with constitutive phosphorylation of LYN, SLP65, SYK, and PKCβ in some patients [45, 46]. Meanwhile, the tumor microenvironment plays an important role in the pathogenesis of MCL, where BTK is crucial for the retention of MCL cells in lymphoid tissues [47]. Therefore, BTK inhibitors can inhibit the activation of BTK, further blocking the activation of the BCR signaling pathway in the long term [48, 49], thereby forcing MCL cells to leave the lymphoid tissues and enter the peripheral blood circulation.

LP-168 is a new generation of highly selective BTK inhibitor independently developed by Guangzhou Lupeng Pharmaceutical Co., Ltd.. It can irreversibly and covalently inhibit Wild-type BTK and reversibly and non-covalently inhibit BTK with the C481 mutation. It combines the advantages of first, second, and new generation BTK inhibitors, being safe, effective, and resistant to drug resistance. It offers more profound and lasting therapeutic effects for clinical hematological neoplasms.

1. **Primary Results of Preclinical Studies**

**2.1 Pharmacology Studies**

Preclinical pharmacological study has demonstrated that LP-168 forms a covalent bond with the active site cysteine of BTK at the molecular level, acting as an irreversible inhibitor of Wild-type BTK. Additionally, LP-168 is also active against BTK with mutations at the cysteine 481 residue, such as mutations changing the cysteine residue to serine, phenylalanine, or arginine, and mutations changing the threonine 474 residue to serine. Selective kinase inhibition assays and competitive binding assays for LP-168 indicate weak inhibitory and binding activity to other human kinases besides BTK. *In vitro* mechanistic studies have showed that LP-168 inhibits CD69 expression on human primary B cells, binds to BTK cysteine-481 residue (target occupancy) in REC-1 cell line, and represses ERK protein phosphorylation (BTK-regulated cell signaling) in REC-1 cells. At the cellular level, LP-168 shows a good anti-proliferative effect on REC-1 cell line. The administration of LP-168 at a certain dose significantly inhibits tumor growth in LY2298 human B-cell lymphoma xenograft models and REC-1 human lymphoma xenograft models in female cb.17 SCID mice. The tumor inhibitory activity of LP-168 at a dose of 5 mg/kg is superior to that of Acalabrutinib and Ibrutinib.

Safety pharmacology studies have demonstrated that the IC50 of LP-168 on the inhibition of hERG potassium current is greater than 29.57 μM, which indicates that LP-168 has a low risk of cardiac toxicity, and shows no effect on the neurological behavior of mice as well as the respiratory system function and cardiovascular system in beagle dogs.

**2.2 Pharmacokinetic Studies**

The sponsor have conducted the study of the absorption, distribution, metabolism, and excretion characteristics of LP-168 in animals according to the relevant national requirements for non-clinical pharmacokinetic study of Class 1 new drugs, obtained the basic pharmacokinetic parameters, evaluated the inhibitory and inductive effects of LP-168 on major CYP450 enzymes as well as the species variation in metabolic processes, and identified the major metabolic enzyme phenotypes.

The pharmacokinetic studies in CD-1 mice receiving gavage administration indicated that LP-168 had low clearance, plasma distribution, and oral bioavailability in mice (20.0%/10 mg/kg, 17.3%/30 mg/kg, and 15.0%/100 mg/kg). Pharmacokinetic studies in beagle dogs receiving gavage administration showed that LP-168 exhibited low plasma clearance, low plasma distribution, and low to moderate bioavailability in dogs (5.53 to 19.0% bioavailability in male dogs and 20.4 to 48.5% bioavailability in female dogs).

LP-168 showed low permeability across Caco-2 cell monolayers, could be transported by efflux, and had little or no potential for being a substrate of P-gp and BCRP.

The protein binding rate of LP-168 was high in all animals tested (the mean binding to human, monkey, dog, rat, and mouse proteins was 95% to 99%, respectively). LP-168 did not exhibit high erythrocyte distribution in mouse, dog, and human blood at concentrations of 0.2, 2, or 10 μM, and the whole blood-to-plasma and erythrocyte-to-plasma concentration ratios showed no obvious concentration-dependent manner. LP-168 exhibited a rapid tissue distribution in CD-1 mice after a single administration of 30 mg/kg and distributed to most tissues within 15 minutes of administration. In male mice, the highest tissue exposure (AUC0-last) was observed in the stomach (214000 ng·h/g) and small intestine (64400 ng·h/g), with the remaining tissues in descending order of the liver, lung, kidney, large intestine, spleen, lymph node, prostate, fat, thymus, heart, muscle, testis, and brain. In female mice, the highest tissue exposure (AUC0-last) was observed in the stomach (221000 ng·h/g) and small intestine (89600 ng·h/g), with the remaining tissues in descending order of the liver, large intestine, ovary, spleen, lung, kidney, uterus, lymph node, fat, heart, thymus, muscle, and brain. LP-168 had a low apparent volume of distribution (Vdz) in mice and dogs, with the Vdz of 0.498 L/kg in mice and the Vdz of 0.720 L/kg and 0.964 L/kg in dogs.

LP-168 was unstable in artificial gastric and intestinal fluids. It was rapidly metabolized in hepatocytes of beagle dogs, moderately metabolized in hepatocytes of CD-1 mice, SD rats, and cynomolgus monkeys, and slowly metabolized in human hepatocytes. A total of 11 metabolites were detected and identified by LC-UV-MS (n=1-2) in liver microsomes of mice, rats, dogs, monkeys, and humans. LP-168 was primarily metabolized by mono-oxidation, N-demethylation, and N-dealkylation. M10 (MW = 777.9, mono-oxidized metabolite), M29 (MW = 747.9, N-demethylated metabolite), M31 (MW = 677.8, N-dealkylated metabolite), and M32 (MW = 777.9, mono-oxidized metabolite) were the most prominent metabolites. The distribution of the various metabolites varied markedly among the five species, especially in dog microsomes. After incubation of LP-168 with hepatocytes of mice, rats, dogs, monkeys, and humans, a total of 27 metabolites (M1-M5, M9-M10, M13-M19, M21-M22, M25, M27-M35, and M37) were detected. Based on the mass spectrometry response signal, M22 was considered the most abundant metabolite among the five species, accounting for 50.0%, 65.1%, 61.5%, 66.7%, and 19.7% of total abundance in hepatocytes of mice, rats, dogs, monkeys, and humans, respectively. No specific metabolites were found in human hepatocytes, and the major metabolic pathways of LP-168 in hepatocytes were hydrolysis, N-demethylation, mono-oxidation, di-oxidation, and glutathione addition. After gavage administration of LP-168 at 100 mg/kg, 14 metabolites (M8, M9, M14, M18, M23, M25, M28, M31, M32, M33, M34, M35, M36, and M37) were detected in plasma of CD-1 mice, of which M28, M31 (MW = 677.8, N-dealkylated metabolite), and M34 (MW = 793.9, di-oxidized metabolite) were the 3 most abundant metabolites. The prototype parent drug LP-168 remained the major ingredient in plasma samples. The major metabolic pathways of LP-168 in mouse plasma were mono-oxidation, di-oxidation, and N-dealkylation. After gavage administration of 30 mg/kg LP-168 to beagle dogs, a total of 8 metabolites were detected in dog plasma: M10, M11, M12, M18, M29, M31, M34, and M37, of which M29 was the most abundant metabolite, accounting for 38.6% and 42.5% of the total mass spectrometry abundance in plasma of male and female dogs, respectively. The relative abundance of parent drug LP-168 in plasma of male and female dogs was greater than 48.8%, making it the most predominant ingredient. There was no apparent sex difference in metabolites of LP-168 in dog plasma, and the major metabolic pathway in dog plasma was N-demethylation. Metabolizing enzyme phenotyping studies indicate that CYP3A is the major metabolizing enzyme for LP-168, CYP2C8 may play a minor role, and other isozymes (CYP1A2, CYP2B6, CYP2C9, CYP2C19, and CYP2D6) play little or no role.

The mass balance test in mice showed that the main excretion pathway of LP-168 was feces (the percent recovery of LP-168 was 16.3% and 17.4% in feces, and 0.426% and 0.109% in urine of male and female mice, respectively). The plasma elimination half-life of LP-168 was 1.17 h in mice and 1.59-1.62 h in dogs. Plasma clearance (CL) was low in mice and dogs, which was 4.88 mL/min/kg and 5.37 to 7.13 mL/min/kg, respectively.

Results from pharmacokinetic and toxicokinetic studies in mice indicated that systemic exposure Cmax and AUC0-last increased less than or near the proportion of dose increase, with little sex difference. Results from pharmacokinetic and toxicokinetic studies in dogs indicated that systemic exposure Cmax and AUC0-last increased less than the proportion of dose increase, with little sex difference (large individual variability in animal exposure).

LP-168 showed an inhibitory effect on both CYP1A2 and CYP2C8, with IC50 of 25.3 μM and 21.1 μM, respectively, and exhibited time-dependent inhibition on CYP3A4 (with testosterone as the substrate) and possible time-dependent inhibition on CYP3A4 (with midazolam as the substrate). The clinical relevance of inhibition on CYP3A enzyme required further investigation. Both enzyme activity and gene expression data revealed that the test article, LP-168, was not an inducer of cytochrome P450 isozymes CYP1A2, CYP2B6, and CYP3A4 at concentrations of 0.150, 1.50, and 15.0 µM.

*In vitro* transporter studies suggested that LP-168 had little or no potential to be a substrate of P-gp and BCRP, with IC50 greater than 10 μM for P-gp and 5.89 μM for BCRP. LP-168 was not a substrate of OATP1B1, OATP1B3, OAT1, OAT3, OCT2, MATE1, and MATE2-K transporters. LP-168 showed an inhibitory effect on OATP1B3, OCT2, MATE1, and MATE2-K, with IC50 values of 0.282, 7.80, 1.72, and 1.07 μM, respectively. The IC50 values for OATP1B1, OAT1, and OAT3 were greater than 10.0 μM. The clinical relevance of LP-168 on transporter inhibition required further investigation.

**2.3 Toxicology Studies**

In support of the IND application, safety pharmacology, general toxicology, and genotoxicity studies have been conducted in accordance with NMPA GLP. These studies include: the hERG testing; the cardiovascular telemetry study using a telemetry system in conscious beagle dogs; the 28-day toxicity and toxicokinetic study in CD-1 mice (with a 28-day recovery period, including behavioral/central nervous system function assessments) and in beagle dogs (with a 28-day recovery period, including respiratory system function assessments); the bacterial reverse mutation test (Ames); the chromosomal aberration test in Chinese hamster ovary cells; and the micronucleus test in mouse bone marrow cells.

In addition, a GLP maximum tolerated dose study and a 14-day repeated dose range-finding study of LP-168 were conducted in both CD-1 mice and beagle dogs.

CD-1 mice were administered with LP-168 by gavage at a single dose of 2000 mg/kg or received repeated gavage administration of LP-168 at a dose of 200 mg/kg (for 14 consecutive days), and the both were tolerable. Single gavage administration of LP-168 at 1000 mg/kg or repeated gavage administration of LP-168 at 30 mg/kg for 14 consecutive days in beagle dogs was tolerable.

LP-168 (daily doses of 30, 100 and 300 mg/kg) was administered once daily by gavage to male and female CD-1 mice for 28 consecutive days, and no test article-related toxic reaction was observed. The no-observed-adverse-effect level (NOAEL) of mice was considered to be 300 mg/kg per day. The severely toxic dose in 10% of animals (STD10) was expected to be greater than 300 mg/kg in female and male mice.

In a longer-term repeated-dose toxicity study, LP-168 (daily doses of 30, 100 and 300 mg/kg) was administered to CD-1 mice by gavage for 13 consecutive weeks, and no administration-related adverse changes were observed in clinical symptom, body weight, food consumption, ophthalmic examination, clinical pathology (hematology and serum biochemistry), organ weight, gross anatomy, and histopathology. The NOAEL of CD-1 mice was 300 mg/kg. The AUC0-24h and Cmax of LP-168 after the final administration (the day 91) at the NOAEL were 142000 hr*ng/mL and 7120 ng/mL in male mice and 175000 hr*ng/mL and 8540 ng/mL in female mice, respectively.

Male and female beagle dogs were administered with LP-168 (daily doses of 10, 30, and 100 mg/kg) by gavage, once daily for 28 consecutive days. Significant increase in ALT was observed in the high-dose group at the end of administration period, which was considered to be the administration-related toxic reaction. In addition, slight to moderate erythrophagocytosis and medullary sinus congestion were observed in mesenteric and submandibular lymph nodes in each administration group, and moderate lymphopenia was observed in the thymus of one male dog in the high-dose group. The NOAEL of beagle dogs was considered to be greater than 30 mg/kg/day. The HNSTD of LP-168 in beagle dogs was 100 mg/kg.

In a longer-term repeat-dose toxicity study, male and female beagle dogs were administrated with LP-168 at doses of 10, 30, or 80 mg/kg/day by oral gavage once a day for 13 weeks, with a 28-day recovery period, and one female dog at 80 mg/kg/day died. The cause of death was severe lymphocyte depletion leading to immunosuppression, which in turn caused bacterial septicemia. LP-168-related deleterious but recoverable microscopic findings (consisting of minimal or slight epithelial single cell necrosis, hypertrophy/hyperplasia, mixed cell infiltration, and/or increased epithelial mitotic figures) were observed in the gallbladder mucosa of male dogs at ≥ 30 mg/kg/day and female dogs at 80 mg/kg/day. A moderate decrease of lymphocytes was observed in the thymus of the dose group at 80 mg/kg/day. Compared to the control group, body weight of male and female dogs in the 80 mg/kg/day group at the end of administration period were reduced by 15.9% and 16.3%, respectively. In summary, the NOAEL was considered to be 10 mg/kg/day for male dogs and 30 mg/kg/day for female dogs. The corresponding AUC0-24h and Cmax after the final administration of LP-168 at the NOAEL were 52900 ± 37100 hr*ng/mL and 8370 ± 5360 ng/mL for male dogs and 39000 ± 25200 hr*ng/mL and 5040 ± 2290 ng/mL for female dogs, respectively.

The genotoxicity of LP-168 was assessed via the bacterial reverse mutation (Ames) test, *in vitro* chromosomal aberration test in Chinese hamster ovary cells, and *in vivo* micronucleus test in mammalian bone marrow cells, which indicated that LP-168 exhibited no mutagenicity at clinically relevant concentrations.

**2.4 Summary of Preclinical Study Data**

In summary, the non-clinical data of LP-168 may help to understand the pharmaco-toxicological characteristics of LP-168. LP-168 had a good oral bioavailability. No human-specific metabolites were observed. The safety pharmacology risk was small. It had no mutagenicity and the tolerance of single administration was good. Slight to moderate acute intrasinus/especially acute hemorrhage in lymph nodes was observed in CD-1 mice after repeated administration. Slight to moderate erythrophagocytosis in lymph nodes was observed in Beagle dogs after repeated administration. Meanwhile, hematological examination showed decreased erythrocyte count, hemoglobin, and hematocrit. Compared with the control group, the percentages of erythrocyte count, hemoglobin, and hematocrit were reduced by 29.14%, 28.3%, and 20.5% in male beagle dogs in the high dose group (80 mg/kg). Compared with the control group, the above three indicators showed decreased percentages of 32.51%, 30.5%, and 24.6% in female beagle dogs in the high-dose group (80 mg/kg), and all returned to normal levels at the end of recovery period. Decreased erythrocyte count, hemoglobin and hematocrit were also observed in the high dose group of CD-1 mice, but the changes were small. The same or similar hematological and histopathological changes were found in the non-clinical study of marketed drugs with the same target. The hematological and histopathological changes were related to the mechanism of action.

Toxic reactions noted in beagle dogs receiving repeated administration included minimal or mild epithelial single cell necrosis, hypertrophy/hyperplasia, mixed cell infiltration, and/or increased epithelial mitosis in the gallbladder mucosa, and slight to moderate lymphopenia in the thymus, which correlated with the decreased thymic weight and hematological change, lymphopenia. The immunosuppression caused by severe lymphopenia in the thymus may result in the death of one dog due to bacterial septicaemia. The above histopathological changes of the gallbladder mucosa in beagle dogs were not observed in the low dose group of dogs or mice. In addition, in the phase I clinical study of LP-168, no clinical signs related to hepatobiliary lesions or changes in serum biochemical parameters were observed when patient systemic exposure was close to or higher than the systemic exposure in beagle dogs at 30 mg/kg. Therefore, it was speculated that this was a species-specific toxic reaction in beagle dogs. In addition, the decrease in the number of lymphocytes in the thymus was accompanied by the decrease of lymphocytes in the blood. This hematological indicator was a clinical hematological indicator, which was easy to monitor and the risk was controllable. Therefore, the preclinical study provides support for conducting an open-label, single-arm, multicenter phase 2 clinical study to evaluate the efficacy and safety of LP-168 as a monotherapy in relapsed or refractory mantle cell lymphoma.

1. **Selection of Target Dose in the Study**

Two clinical trials in oncology and one clinical trial in healthy subjects have been conducted with LP-168 Tablets. Among these, a phase I, multicenter, open-label, dose-escalation study has been performed to evaluate the safety, tolerability, pharmacokinetics, and preliminary efficacy of oral LP-168 in subjects with relapsed or refractory B-cell malignant lymphoma (Study No.: LP-168-CN101; CDE Clinical Trial Registration No.: CTR20211173) in China. The phase Ia dose-escalation trial has been successfully completed and this study has entered the enrollment period of phase Ib. Meanwhile, a phase I clinical study of LP-168 in subjects with relapsed or refractory B-cell lymphoma has also been conducted in the US (Study No.: LP-168-US-I01; Clinical Trial Registration No.: NCT04775745). The study has been approved by FDA on July 6, 2021 and is currently in the enrollment phase. In addition, the CDE Clinical Trials Notification (Acceptance No.: CXHL2101447 and CXHL2101448; CDE Clinical Trials Registration No.: CTR20220960) has been obtained on November 11, 2021, approving the conduct of a randomized, double-blind, placebo-controlled phase I clinical study to evaluate the safety, tolerability, and pharmacokinetics of LP-168 Tablets in healthy subjects after single and repeated administration in China (Study No.: LP-168-CN102; CDE Clinical Trials Registration No.: CTR20220960). At present, the database of this study is locked. To date, in both oncology studies, subjects primarily enrolled in China are those with R/R MCL, while subjects primarily enrolled in the US are those with R/R CLL/SLL.

The selection of the target study dose for this project is mainly based on the PK/PD, safety, and efficacy data of the above 3 phase I studies.

**3.1 Introduction and Progress of Conducted Clinical Studies**

**3.1.1 LP-168-CN101 Study**

On March 11, 2021, the CDE Clinical Trial Notification (Acceptance No.: CXHL2000688) was obtained and a phase I, multicenter, open-label, and dose-escalation study was approved to evaluate the safety, tolerability, pharmacokinetics, and preliminary efficacy of oral LP-168 in subjects with relapsed or refractory B-cell malignant lymphoma in China (Study No.: LP-168-CN101; CDE Clinical Trial Registration No.: CTR20211173). The population enrolled in the phase Ia study included patients with follicular lymphoma (FL), diffuse large B-cell lymphoma (DLBCL), MCL, and MZL. A total of 3 dose groups (100mg QD, 150mg QD and 200mg QD) were set, and the dose escalation was performed using a classic “3 +3” escalation design. The population enrolled in phase Ib was patients with relapsed/refractory B-NHL, and the expansion study was conducted in 3 dose groups: 100 mg QD, 150 mg QD and 200 mg QD. Eligible subjects were treated with LP-168 once daily in 28-day cycles until disease progression or unacceptable toxicity. The first patient in the study was enrolled on August 10, 2020. As of May 31, 2023, a total of 68 subjects were enrolled and completed the escalation and DLT observation of all 3 dose groups (100 mg QD, 150 mg QD, and 200 mg QD) in phase Ia. The enrollment of phase Ib is currently ongoing.

**3.1.2 LP-168-US-I01 Study**

On July 6, 2021, a phase I clinical study of LP-168 in subjects with relapsed or refractory B-cell lymphoma was approved by the FDA in the US (Study No.: LP-168-US-I01; Clinical Trial Registration No.: NCT04775745). The objectives of this study were to assess the safety, tolerability, preliminary efficacy, and PK characteristics of LP-168 as a single drug and to determine the MTD and RP2D of LP-168. Subjects were orally administrated with LP-168 daily until disease progression and unacceptable toxicity occurred, or clinical observations met the criteria for withdrawal from treatment. As of June 12, 2023, 46 subjects were enrolled and completed the enrollment and DLT observation of the 100 mg QD, 150 mg QD, 200 mg QD, 150 mg BID, and 300 mg QD dose groups. More patients are being enrolled to determine the RP2D in CLL/SLL.

**3.1.2 LP-168-CN102 Study**

This was a single-center, randomized, double-blind, placebo-controlled, and phase I clinical study to evaluate the safety, tolerability, pharmacokinetics, the effect of food on pharmacokinetics, and the target occupancy effect of single and repeated administration of LP-168 Tablets in healthy subjects. Approximately 40 healthy subjects were planned to be enrolled in the single administration period of this study and 4 dose groups of 12.5 mg, 25 mg, 50 mg and 75 mg were set. Approximately 10 subjects were enrolled in each dose group. The subjects of each sex were not less than 1/3. The dose ratio of LP-168 to placebo was 8:2. Sentinel dosing was applied for the single administration in each dose group. Specifically, subjects were administrated in 2 batches, with 2 subjects in the first sentinel cohort (Cohort A) receiving LP-168 and 8 subjects in the second formal cohort (Cohort B) receiving LP-168 and placebo in a 6:2 ratio. For the first 12.5 mg dose group, 2 subjects in the sentinel cohort (Cohort A) completed the administration and did not experience SAR or ≥ Grade 2 adverse reactions 48 hours after administration, and then the enrollment of 8 subjects in the formal cohort (Cohort B) could be initiated. The food effect study was conducted in the single administration group at a dose of 50 mg. A total of 10 subjects in the 50 mg S3A and S3B cohorts (no less than 1/3 of each sex) were included in the food effect study. The subjects underwent 2 cycles of self-crossover administration, respectively. The safety observation was conducted for 4 days after the initial administration, which was considered the first period. The washout period between two administrations was 5 days, and the interval between the first and second periods was 1 day. Of a total of 10 subjects in S3A and S3B cohorts, 8 subjects received LP-168 administration and 2 subjects received placebo administration. The subject was randomized to receive a drug number and randomly assigned in a 1:1 ratio to either the fast-postprandial group (FE1) or the postprandial-fast group (FE2). In the repeated administration period of this study, 12.5 mg, 25 mg, and 50 mg dose groups were selected, and 10 subjects were enrolled in each dose group, with subjects of each sex no less than 1/3. The dose ratio of LP-168 to placebo was 8:2 in each dose group, and a total of 30 subjects were enrolled.

This study was initiated in May 2022, and a total of 70 healthy adult subjects were enrolled in the single and repeated administration periods. The 7 dose groups were set, administrated, and observed clinically. The clinical database was locked on December 29, 2022.

**3.2 PK and PD Data from Conducted Clinical Studies**

In terms of pharmacokinetics, the results of two phase I clinical studies in China showed that plasma exposure (Cmax and AUC0-t) of LP-168 in the dose range of 12.5 mg to 200 mg was generally in direct proportion to the dose. The PK data obtained from the US phase I study revealed that the increase in exposure tended to be slower with the dose increase from 150 mg to 200 mg. Overall, compared with the 100 mg dose group, PK data indicated that LP-168 was dose-linear from 12.5 mg to 150 mg, with a linear increase in exposure in the 150 mg dose group.

In terms of pharmacodynamics, the results of study LP-168-CN102 showed that after a single 12.5 mg dose in healthy subjects, BTK occupancy in peripheral blood mononuclear cells was almost 100% in 5 out of 8 subjects who received the study drug, while the free BTK was still detectable in 3 subjects (lower limit of quantification 0.313 ng/mL), but the free BTK concentrations were below the lower limit of quantification in samples within 24 hours after administration as the dose was increased to 25-75mg. The clinical study results of LP-168 in subjects with B-cell lymphoma showed that in both the US LP-168-US-I01 study (primarily enrolling subjects with CLL) and the Chinese LP-168-CN101 study (primarily enrolling subjects with MCL and DLBCL), when LP-168 was administered orally at 100mg QD, most subjects achieved 100% BTK occupancy in peripheral blood mononuclear cells, but a small number of subjects still did not achieve or approach 100% target occupancy. Taking into account the inter-patient differences, it is speculated that further increasing the dose based on 100mg QD will help more subjects achieve 100% target occupancy, thus further improving the clinical efficacy.

**3.3 Summary of Safety Data from Conducted Clinical Studies**

**3.3.1 LP-168-CN101 Study**

As of May 31, 2023, a total of 68 subjects could be included in the SS set and evaluated for safety. The results showed that the overall safety and tolerability of LP-168 Tablets monotherapy in Chinese subjects with relapsed or refractory B-cell non-Hodgkin's lymphoma was good within the dose range of 100-200mg QD. The median treatment duration for all subjects was 2.9 months (range: 0.3-21.5 months), and the median treatment duration for subjects in the 100mg QD, 150mg QD and 200mg QD dose groups was 13.1 months (range: 1.6-21.5 months), 2.0 months (range: 0.3-12.8 months) and 3.6 months (range: 1.6-7.6 months), respectively. Overall, DLT was observed in all subjects in Phase 1a of LP-168 Tablets 100mg QD to 200mg QD. DLT was not observed in the dose range of LP-168 Tablets 100 to 200mg QD. LP-168 demonstrates favorable tolerance and safety profile.

Although a total of 64 (94.1%) subjects experienced at least one treatment-emergent adverse events (TEAEs) of any grade in this study, only 14 (20.6%) subjects experienced at least one TEAEs of Grade ≥ 3. These adverse events included TEAEs that were judged by the investigator to be not related to the study drug.

The TEAEs (any grade) occurring in ≥ 10% of subjects overall across all dose groups included neutrophil count decreased (29.4%), platelet count decreased (26.5%), anemia (23.5%), COVID-19 (19.1%), white blood cell count decreased (17.6%), hyperuricemia (16.2%), petechiae (14.7%), lymphocyte count decreased (13.2%), blood creatinine increased in 9 subjects (13.2%), rash (11.8%), hyperlipidemia (10.3%), and upper respiratory tract infection (10.3%), and were primarily hematologic toxicities, most of which were Grade 1 to 2 in severity. The incidence of the most common (≥ 10% of subjects in all dose groups overall) TEAEs was generally comparable across dose groups by 100mg QD (N=13), 150mg QD (N=40), and 200mg QD (N=15) dose groups, except neutrophil count, platelet count decreased, white blood cell count decreased, and petechiae, which were higher at 150mg and 200mg. These adverse events included TEAEs that were judged by the investigator to be not related to the study drug.

The Grade 3 TEAEs were neutrophil count decreased, pneumonia, lymphocyte count decreased, white blood cell count increased, lymphocyte count increased, white blood cell count decreased, anaemia, oral infection, hypokalaemia, hyperlipidemia (possibly unrelated), and immune-mediated pancreatitis (possibly unrelated) in 14 subjects. Grade 4 neutrophil count decreased and Grade 5 pneumonia (unrelated) were reported in 2 and 1 subject, respectively. Grade ≥ 3 TEAEs in each dose group were [ 4 subjects at 100mg QD (30.8%), 11 subjects at 150mg QD (27.5%), and 2 subjects at 200mg QD (13.3%)].

A total of 22 TEAEs leading to interruption of the study drug occurred in 15 (22.1%) subjects, including 2 cases of COVID-19 (unrelated), 1 case of pneumonia (unrelated), respiratory tract infection, pyrexia (unrelated), and gastrointestinal adenoma (unrelated) in the 100mg dose group; 3 cases of COVID-19 (unrelated), 2 cases of neutrophil count decreased, 1 case of white blood cell count decreased, lymphocyte count increased, oral infection, pneumonia (unrelated), SARS-CoV-2 test positive (unrelated), and immune-mediated pancreatitis (possibly unrelated) in the 150mg dose group; 2 cases of cough, 1 case of nasal discharge, COVID-19 (unrelated) and SARS-CoV-2 test positive (unrelated) in the 200mg dose group. As of the data cutoff date, only 1 subject had a dose reduction (150 mg → 100 mg) due to an AE of immune-mediated pancreatitis (possibly unrelated), no subjects had permanent drug withdrawal due to an AE, and 1 subject died due to pneumonia (unrelated to the study drug) during the study treatment/within 28 days after drug withdrawal.

A total of 10 serious adverse events (SAEs) occurred in 9 subjects, of which 6 were judged by the investigator to be unrelated to LP-168 (definitely related, probably related, and possibly related), including 2 cases (1 each at 100mg and 150mg) of Grade 3 and 1 case (100mg) of Grade 2 pneumonia, and 1 case of Grade 3 oral infection, lymphocyte count increased, and immune-mediated pancreatitis, respectively (all at 150mg). All of the above cases resulted in hospitalization or prolongation of hospitalization. The other 4 cases were judged by the investigator to be unrelated to LP-168, including 3 cases (2 at 100mg and 1 at 150mg) of pneumonia and 1 case (100mg) of villous tubular adenoma of the cecum that resulted in hospitalization or prolongation of hospitalization of the subject.

Safety data from Study LP-168-CN101 as of May 31, 2023 indicate that LP-168 has demonstrated a favorable safety and tolerability profile in patients with B-NHL as well as in the R/R MCL subpopulation. No DLTs occurred, and only 16 of the 68 subjects in the overall population experienced TEAEs of Grade 3 or higher, 3 of which were judged to be unrelated to the study drug. There were only 6 SAEs whose relatedness with the study drug could not be excluded (definitely related, probably related and possibly related). One subject had a Grade 5 TEAE (unrelated to the study drug). Of the 33 subjects with R/R MCL, 9 subjects experienced TEAEs of Grade 3 or higher TEAEs. Only 3 subjects experienced SAEs. So far, there have been no permanent withdrawal of the drug due to TEAEs in the study. The incidences of all grades of neutrophil count decreased, platelet count decreased, white blood cell count decreased and petechiae were higher in the 150mg and 200mg dose groups, but the incidences of grade 3-4 neutrophil count decreased, platelet count decreased and white blood cell count decreased were basically comparable to those in the 100mg dose group. Overall, LP-168 was well tolerated by the subjects in each dose group with no apparent dose-related toxic effects.

**3.3.2 LP-168-US-I01 Study**

As of June 12, 2023, 46 subjects with R/R CLL/SLL, MCL, MZL and HCL were evaluable for safety. 95.7% (44/46) of the subjects experienced at least one TEAE. The TEAEs with an incidence of ≥ 10% included: fatigue (34.8%), diarrhea (32.6%), arthralgia (28.3%), headache (28.3%), constipation (23.9%), cough (19.6%), vomiting (19.6%), dizziness (19.6%), COVID-19 (17.4%), nausea (17.4%), blood creatinine increased (15.2%), rash maculopapular (13.0%), back pain (13.0%), nasal congestion (13.0%), contusion (13.0%), hyperhidrosis (13%), muscle spasms (13.0%), decreased appetite (13.0%), dyspepsia (13.0%), electrocardiogram QT prolonged (13.0%), palpitations (13.0%), neutrophil count decreased (13.0%), sinusitis (10.9%), epistaxis (10.9%), abdominal pain (10.9%), hyperuricemia (10.9%), dyspnea (10.9%), skin infection (10.9%), peripheral edema (10.9%), toothache (10.9%), and petechiae (10.9%). The Grade ≥ 3 TEAEs included fatigue, constipation, COVID-19 infection, back pain, electrocardiogram QT prolonged, neutrophil count decreased, sinusitis, and dyspnea. At the same time, the preliminary data showed that the safety and tolerability of each dose group were good, and no significant dose-related toxic and side effects were observed.

Fourteen subjects experienced SAEs. Specifically, 4 subjects had SAEs considered possibly related or at least possibly related to the study drug: pneumonia (possibly related by both the investigator and the sponsor), hyperkalemia (possibly related by both the investigator and the sponsor), intracranial hemorrhage (possibly related by the investigator, unrelated by the sponsor), and shock of unknown origin (possibly related by the investigator, unrelated by the sponsor). Two subjects had dose modifications due to Grade 2 AEs, 1 subject had dose modifications from 150mg QD to 100mg QD due to Grade 2 increased blood creatinine (possibly unrelated), and 1 subject had dose modifications from 150mg BID to 100mg QD due to Grade 2 skin infection (definitely related); Two subjects permanently withdrew the drug due to adverse events, 1 with Grade 3 tumor flare and 1 with Grade 3 acute kidney injury, both of which were judged to be unrelated to LP-168 administration.

In conclusion, as of Jun 12, 2023, in the LP-168-US-I01 study, no DLT occurred, 24 of the 46 subjects experienced Grade 3 TEAEs, most of which were unrelated to the study drug. Specifically, only 4 events were judged as possibly related to the study drug, including neutropenia, lymphopenia and hemorrhage, and only 1 case of neutropenia was judged as probably related to the study drug. There were 4 SAEs that were judged by the investigator to be possibly related or at least possibly related to the study drug. Two subjects had dose modifications due to Grade 2 AEs; Although 2 subjects permanently withdrew the drug due to adverse events, none was judged by the investigator to be related to LP-168 administration. LP-168 was generally safe and well tolerated. It was well tolerated by the subjects in each dose group, and no significant dose-related side effects were observed.

**3.3.3 LP-168-CN102 Study**

As of December 29, 2022, 70 subjects in all the 7 dose groups have been enrolled, dosed, and observed in the LP-168-CN102 study. Currently, the clinical database has been locked and the study has been unblinded. In terms of safety, a total of 67 AEs occurred in 56 subjects who received each dose of LP-168 Tablets. Specifically, 1 AE was CTCAE Grade 2 in severity and the remaining 66 AEs were CTCAE Grade 1 in severity. A total of 4 AEs occurred in 14 subjects who received placebo, all of which were CTCAE Grade 1 in severity. Among the above AEs, a total of 21 AEs were assessed by the investigator as related to the study drug or placebo (TRAE, excluding possibly unrelated or definitely unrelated), all of which occurred in the subjects taking each dose of LP-168. No AE of Grade 3 or above occurred, and no subjects had dose modifications, interruptions, or discontinuations due to AEs. No SAE occurred.

Based on the above safety data, LP-168 had a very excellent clinical safety profile, and was well tolerated by subjects from 12.5 mg to 300mg.

**3.4 Efficacy Data from Conducted Clinical Studies**

**3.4.1 LP-168-CN101 Study**

As of 24 July 2023, a total of 65 subjects in all dose groups (100mg QD, 150mg QD and 200mg QD) in the dose escalation and expansion study were evaluable for efficacy (according to the PPS set). Forty-four subjects achieved an objective response (ORR: 67.7%) as assessed by the investigator (same below), including 18 subjects with complete response (CR) or complete metabolic response (CMR) and 26 subjects with partial response (PR) or partial metabolic response (PMR). The best response of 7 subjects was stable disease (SD). Specifically, 5 subjects showed varying degrees of shrinkage of their target lesions. Currently, 5 subjects are still under treatment, and the longest treatment duration has exceeded 23 cycles (28 days/cycle). The best response was assessed as progressive disease (PD) in 14 subjects (21.5%). The time from the median to first response (mTTR) was 1.9 months (range 1.6 to 4.6 months). With a median follow-up of 5.7 months (range: 2.0 to 22.3 months), data on the median duration of disease response (DOR), progression-free survival (PFS), and overall survival (OS) are immature. Of the patients who achieved an objective response, 37 (84.1%) are still in response. The efficacy by dose group and lymphoma type is shown in Table 13. Of the 11 subjects with non-germinal center (non-GCB) DLBCL, 8 (72.7%) achieved objective response, including 4 (36.4%) patients with CMR. In the 14 subjects with MZL, the ORR and disease control rate (DCR) were 64.3% and 85.7%, respectively.

Of the 32 subjects with R/R MCL who were evaluable for efficacy and had one response assessment, 25 (78.1%) achieved a disease response, including 12 who achieved CR/CMR and 13 who achieved PR/PMR. The time from the median to first response was 1.9 months (range: 1.7 to 4.6 months). By dose group, among the 8 subjects in the 100mg QD group, 6 (75%) achieved a response and 4 (50.0%) achieved a CR. Two subjects had PD at the first efficacy evaluation and both were withdrawn from study treatment. Of the 23 subjects in the 150mg QD dose group, 18 subjects achieved a response (78.3%), including 8 subjects who achieved CR/CMR (34.8%). One subject in the 200 mg QD dose group achieved PR (100%). Of the 7 subjects with blastic/pleomorphic variant MCL, 4 were treated with cBTKi, and the best efficacy was CR and PR in 2 and 3 subjects respectively. The first subject with MCL enrolled in the study has been treated for more than 25 cycles.

For the 14 subjects with R/R MCL who had not received prior BTKi therapy and were evaluable for efficacy, preliminary efficacy data showed that 12 subjects (85.7%) achieved a disease response (4 subjects in the 100mg dose group, 7 subjects in the 150mg dose group, and 1 subject in the 200mg dose group), including 6 subjects with CR and 6 with PR. Specifically, only 1 subject with PR (01015, 150mg QD dose group, polymorphic variant) was discharged from the study due to PD after 4 cycles of treatment, and the remaining patients with response are still under continuous treatment. Efficacy analysis was performed by dose group, and all the 4 patients (100%) in the 100mg dose group achieved response, including 3 patients (75.0%) with CR/CMR. Of the 9 subjects in the 150mg dose group, 7 subjects achieved response (77.8%) and 3 subjects achieved CR/CMR. One subject in the 200mg dose group achieved PR (100%).

Of the 18 subjects with R/R MCL previously treated with BTKi who were evaluable for efficacy and had at least one efficacy evaluation, 13 subjects (72.2%) achieved a disease response, including 6 with CR and 7 with PR. By dose group, 2 (50%) of the 4 subjects in the 100mg dose group achieved response, including 1 (25%) with CR/CMR. Of the 14 subjects in the 150mg dose group, 11 subjects achieved response (78.6%), including 5 with CR/CMR (35.7%), and 1 with SD. Of the 12 subjects who were resistant to cBTKi, 8 subjects (66.7%) achieved a response. In terms of the best response, 3 subjects achieved CR/CMR, and 5 achieved PR. By dose group, among the 4 subjects in the 100mg group, 2 subjects achieved response (50.0%). In terms of the best response, 1 subject achieved CR/CMR, 1 achieved PR, and 1 had PD. In the 150mg dose group, 6 of the 9 subjects achieved response (66.7%). In terms of the best response, 2 subjects achieved CR/CMR and 4 achieved PR.

These results indicate that LP-168 has a clear clinical response in a variety of B-cell neoplasms, including DLBCL, MZL, and MCL. In subjects with R/R MCL, the ORR among the 32 evaluable subjects with R/R MCL was 78.1%. The ORR was also 72.2% in the 18 subjects who received BTKi treatment, and 8 (66.7%) of the 12 subjects who were cBTKi-resistant achieved a response. Thus, LP-168 is highly efficacious in the treatment of R/R MCL, including treatment of patients with cBTKi resistance. In addition, the response rate of subjects in the 150mg dose group remained high, even if the number of previous treatment lines was ≥3 (11 subjects) and the mother cell type/pleomorphic variant (7 cases) were concentrated.

**3.4.2 LP-168-US-I01 Study**

As of June 12, 2023, a total of 39 subjects with R/R CLL/SLL, MZL, MCL, WM who had received multiple lines of therapy had completed at least one efficacy evaluation. Twenty-one subjects had an objective response (ORR: 53.8%), including 13 subjects with R/R CLL/SLL who had PR (1 subject at 100mg QD, 5 subjects at 150mg QD, 2 subjects at 200mg QD, 4 subjects at 150mg BID, and 1 subject at 300mg QD); Four subjects with R/R CLL/SLL were PR-L (2 subjects at 100mg QD and 2 subjects at 150mg BID) and 1 subject with R/R MCL was CR (200mg QD); One R/R MZL subject was PR (150mg QD); One R/R WM subject was PR (300mg QD), 1 R/R WM subject was PR-L (200mg QD), and 17 subjects had stable disease with the efficacy evaluation of SD (DCR: 97.4%).

There were a total of 32 evaluable subjects with R/R CLL/SLL, 2 of whom were BTK inhibitor naïve and whose response was both PR (ORR: 100%). Thirty subjects had received prior BTK inhibitor therapy, of which 11 had PR, 4 had PR-L, and 15 had SD (ORR: 50.0%; DCR: 100%).”

There were a total of 3 efficacy-evaluable subjects with R/R MCL, who were treated with 1 kind of cBTKi in the 100 mg QD, 200 mg QD, and 150 mg BID dose groups respectively. The best response of subjects in the 100mg dose group was PD, the best response of subjects in the 200mg dose group was CR/CMR, and the best response of subjects in the 150mg BID dose group was SD.

These preliminary results indicate that LP-168 as a single agent demonstrates promising clinical efficacy in subjects with R/R CLL/SLL, MCL, even after multiple lines of therapy. The results suggest that subjects who have previously received BTKi therapy may still be sensitive to treatment with LP-168, both in subjects with R/R CLL/SLL and in subjects with R/R MCL.

**3.5 Dose-Exposure-Response Correlation Analysis**

The dose-exposure-response correlation (E-R) analysis used data from the pharmacokinetic dataset (PKS) and the exposure-response analysis dataset (ERAS) to first find the effective exposure by analyzing the relationship between exposure and efficacy in the subjects included in the ERAS. Then, the appropriate recommended dose (RP2D) was preliminarily determined by comparing the distribution of descriptive statistics of PK parameters related to exposure of each dose group in the PKS with the obtained effective exposure.

The exposure-related parameters analyzed include Cmax, AUC24h, ss and Ctrough. The efficacy parameters include best objective response rate (ORR), complete response rate (CRR) and best change from baseline in size of progressive disease (SPD). For the correlation analysis of best response evaluation results and PK exposure parameters, it is proposed to arrange the exposure parameters from high to low, divide the subjects into 4 segments according to the 4-percentile of exposure parameters (Q4/Q3/Q2/Q1), and calculate the mean [range] of Cmax, AUC24h, ss, Ctrough, ORR and CRR in each segment. Descriptive statistics will be performed for the age and number of previous treatment lines of subjects in each segment. For the correlation between the best change in SPD and PK exposure parameters, a linear regression analysis was performed, and the correlation was assessed based on the results of the regression analysis.

All subjects with available steady-state multiple-dose PK parameters for each dose group in the LP-168-CN101 study were selected for inclusion in the PKS. The number of subjects included in the PKS was 12, 22 and 12 in the 100mg, 150mg and 200mg dose groups, respectively, consistent with the PK data of multiple-dose administration in the communication data.

All BTKi-treated R/R MCL subjects with efficacy evaluation and at least one PK exposure parameter (Cmax, AUC24h, ss, Ctrough) were selected for inclusion in the ERAS. A total of 19 subjects were included in the ERAS analysis. In comparison to the overall 20 efficacy-evaluable subjects with R/R MCL exposed to BTKi in the ERAS, 19 subjects were included in the ERAS, except for Subject 08001 who was excluded due to lack of PK sample collection and lack of valid PK exposure parameters.

The median values of PK exposure parameters Cmax, AUC24h,ss and Ctrough of each ERAS segment were used as abscissa, respectively, and the efficacy parameter ORR/CRR was plotted on the ordinate. The distribution of PK parameters of each segment from Q1 to Q4 was superimposed in the form of median (minimum-maximum) and scatter plot, so as to analyze PK exposure-best efficacy evaluation. See Figure 2, Figure 3 and Figure 4, respectively.


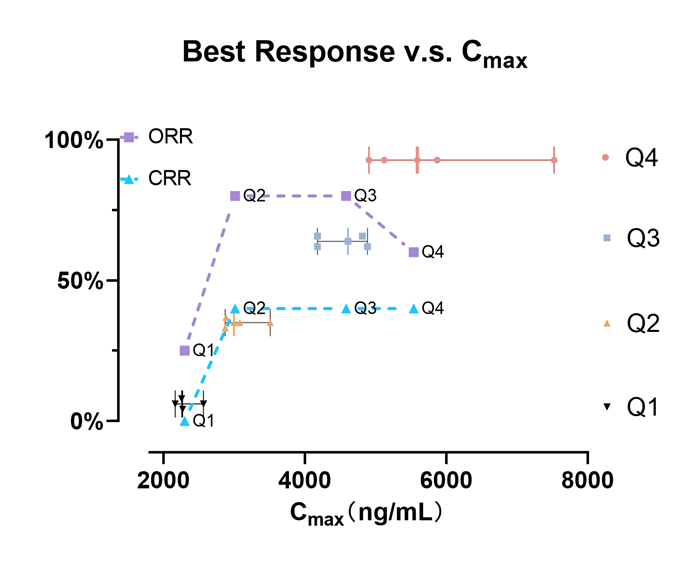


Figure 2 Correlation Analysis between Efficacy Response Evaluation and PK Exposure Parameter Cmax


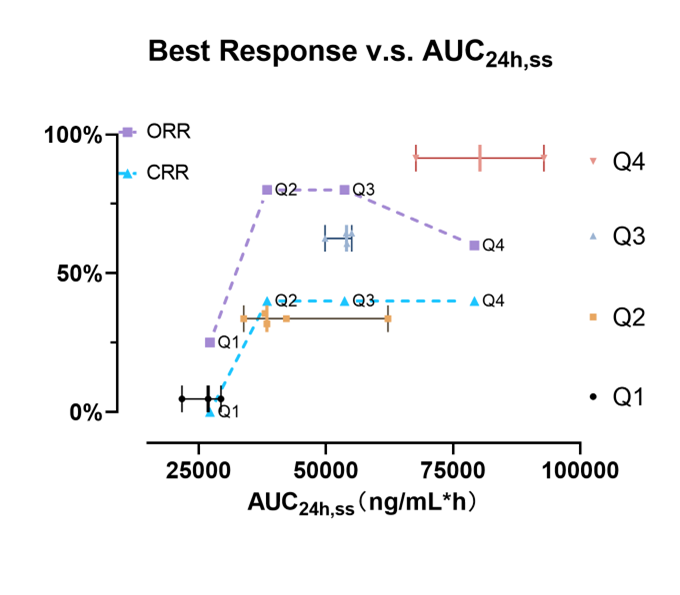


Figure 3 Correlation Analysis of Best Efficacy Evaluation and PK Exposure Parameter AUC24h, ss


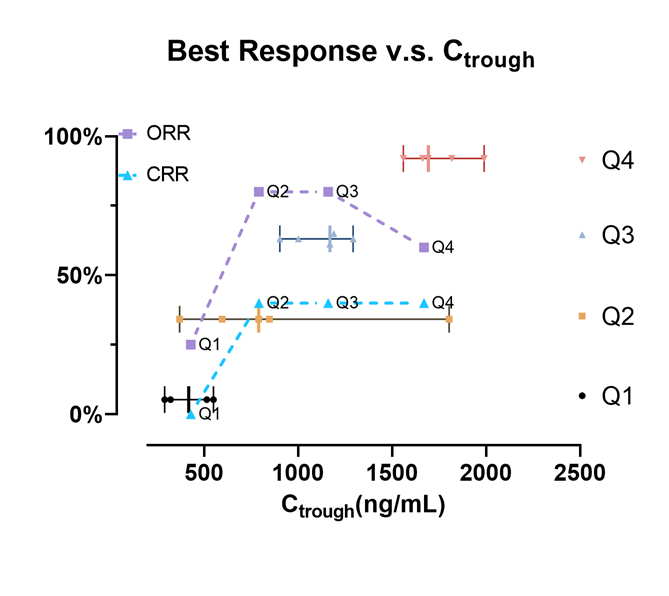


Figure 4 Correlation Analysis between Best Efficacy Evaluation and PK Exposure Parameter Ctrough

Overall, as shown in Figure 2-4, the results of the PK exposure-best efficacy evaluation suggest that the efficacy plateau was reached in the Q2 segment of each exposure parameter analysis, and ORR and CRR did not appear to be significantly increase at higher exposures. In the Q2 group, the corresponding median Cmax, AUC24h,ss and Ctrough were 3010ng/mL, 38436ng/mL*h and 791ng/mL, respectively, while the Cmax, AUC24h,ss and Ctrough of the Q1 quantileof PKS 150mg were 3040ng/mL, 37390ng/mL*h and 784ng/mL, respectively (see Table 1), which were basically the same. Therefore, the exposure-related parameters (Cmax, AUC24h,ss and Ctrough) of most patients at 150mg could reach the median PK exposure of the Q2 segment in the efficacy plateau phase.

Table 1 Mean, standard deviation, median and Q1 quartile statistics of PK exposure parameters in each dose group in PKS

|  |  | Cmax | AUC24h,ss | Ctrough |
| --- | --- | --- | --- | --- |
|  |  | (ng/mL) | (ng/mL*h) | (ng/mL) |
| 100 mg | Mean | 3933 | 51423 | 1170 |
| (N=12) | Standard deviation | 1600 | 25112 | 739 |
|  | Median (Q1) | 3670 (2283) | 47598 (27373) | 1175 (536) |
| 150 mg | Mean | 4610 | 60628 | 1571 |
| (N=22) | Standard deviation | 2138 | 35794 | 1271 |
|  | Median (Q1) | 4515 (3040) | 52157 (37390) | 1170 (784) |
| 200 mg | Mean | 5774 | 78619 | 1849 |
| (N=12) | Standard deviation | 1373 | 27253 | 858 |
|  | Median (Q1) | 5680 (4535) | 70679 (51810) | 1715 (1063) |

The correlation analysis between the best change in SPD and PK exposure parameters shows that only Cmax and the best change in SPD has a negative correlation among the 3 exposure parameters, and the correlation is not good, while the other PK exposure parameters have no negative correlation with the best change in SPD. These findings may be related to the fact that the optimal change in SPD does not take into account new lesions, lesion tumor activity (PET SUV uptake), and the duration of treatment required to cause a change in SPD. Therefore, it may not be a sensitive index to evaluate the dose-effect relationship when the treatment time is still short and the number of cases is small.

In the quantitative analysis study of human Free BTK after administration of LP-168, the titration experiment of BTK protein occupancy in human PBMC lysate by different concentrations of LP-168 was performed by the central laboratory entrusted by the sponsor, and the results showed that LP-168 could completely bind to BTK protein in PBMC lysate when the concentration of LP-168 reached 10 nM *in vitro*. According to the statistical results of PKS, at 150 mg QD, the Q1 quantile of trough concentration Ctrough was 784 ng/mL. Considering that the bound form of LP-168 and wild-type BTK protein is covalently bound, human plasma protein binding is 98.7%. Thus, at steady state after administration of LP-168 150 mg, the trough concentration of plasma free drug, Ctrough, is approximately 10 nM or more in most subjects, i.e., it could be maintained in excess of the fully occupied concentration of the BTK protein in the PBMCs for one dosing interval.

In summary, the results of the best efficacy evaluation and correlation analysis of PK exposure parameters and PK-PD assessment suggest that the 150 mg QD dose is sufficient to maximize the efficacy of LP-168 in the majority of R/R MCL patients exposed to BTKi.

**3.6 Dose Selection of the Study**

These PK, PD, safety, and efficacy data indicate that exposure to LP-168 is approximately dose-proportional from 100 mg QD to 150 mg QD, with a trend toward saturation of subject exposure with further dose escalation. Treatment with LP-168 is well tolerated by subjects in all dose groups. All dose groups has good efficacy in the treatment of R/R MCL. Compared with 100 mg QD, 150 mg QD has better efficacy. However, the efficacy does not appear to be further improved by further increasing the dose. This is also supported by the dose-exposure-response analysis and data from the BTK target occupancy study. Therefore, 150 mg QD is selected as the recommended Phase 2 dose of LP-168 in MCL.

1. **Study Objectives**

**4.1 Primary Objective**

To evaluate the overall response rate (ORR) of LP-168 tablets in subjects with relapsed or refractory mantle cell lymphoma (R/R MCL)

**4.2 Secondary Objectives**

1. To evaluate the complete response (CR) rate, progression-free survival (PFS), overall survival (OS), duration of response (DOR), and time to response (TTR) of subjects with R/R MCL receiving treatment with LP-168 tablets.
2. To evaluate the safety and tolerability of LP-168 monotherapy in subjects with R/R MCL.
3. To evaluate the improvement in quality of life (QoL) by LP-168 monotherapy in subjects with R/R MCL as measured by the EORTC QLQ-C30 questionnaire.
4. To evaluate the pharmacokinetic (PK) characteristics of LP-168.

**4.3 Exploratory Objectives**

1. To evaluate the correlation of potential biomarkers in lymphoma tissue or circulating lymphoma cells with efficacy of LP-168 monotherapy, etc.
2. To evaluate the intrinsic or extrinsic factors that may affect exposure to the study drug.
3. **Study Endpoints and Estimands**

**5.1 Primary Endpoint**

Overall response rate (ORR) [complete response (CR) + partial response (PR)] as assessed by Independent Review Committee (IRC) according to the Lugano 2014 Response Criteria

**5.2 Secondary Endpoints**

1. ORR as assessed by the investigator according to the Lugano 2014 Response Criteria.
2. CR rate, PFS, OS, DOR, and TTR by IRC or investigator assessment.
3. Safety evaluation including vital signs, physical examination, electrocardiogram (ECG) parameters, ECOG performance status, laboratory tests, and adverse events (AEs).
4. Change in subject-reported QoL as measured by the EORTC QLQ-C30 questionnaire.
5. PK characteristics of LP-168 and the correlation of metrics of exposure with efficacy and safety.
6. Parameters related to PK characteristics mainly include maximum concentration (Cmax), time to maximum concentration (Tmax), half-life (T1/2), area under plasma concentration-time curve (AUC0-t, AUC0-∞), clearance (CL/F) and apparent volume of distribution (Vd/F) and other pharmacokinetic parameters

**5.3 Exploratory Endpoints**

1. To evaluate the correlation of potential biomarkers (e.g., BTK mutation, PLC mutation, TP53 mutation, etc.) in lymphoma tissue/circulating lymphoma cells with efficacy of LP-168 monotherapy
2. To evaluate the effect of intrinsic or extrinsic factors such as age, liver function and renal function on the exposure to the study drug by conducting covariate analysis in the population pharmacokinetic model.

**5.4 Estimands**

The primary clinical concern of this study is to evaluate whether the overall response rate (ORR) of LP-168 monotherapy in patients with relapsed or refractory mantle cell lymphoma (R/R MCL) is significantly higher than that achieved in current clinical practice. The primary estimands are defined as follows:

**Population**

Patients with a confirmed diagnosis of relapsed/refractory mantle cell lymphoma (R/R MCL) who have received at least one dose of LP-168, the definition of relapsed/refractory is described in Section 6.3 of the protocol.

**Treatment**

LP-168 150 mg will be administered orally once daily before meals (except for the period from 1 hour before to 2 hours after a meal) in 28-day treatment cycles until disease progression, unacceptable toxicity, or satisfaction of other criteria for treatment termination. Best supportive care is allowed, but concomitant use of anti-cancer therapy and drugs that significantly inhibit or induce the absorptive and metabolic processes of LP-168 is not allowed.

**Variable**

Best overall response (CR/PR/SD/PD) as assessed by IRC from the start of treatment until the start of next line therapy based on the Lugano 2014 Response Criteria for NHL.

**Concurrent events and management strategies**

| Concurrent event | Management strategy | Consideration or explanation |
| --- | --- | --- |
| Early end of treatment | Treatment policy strategy | Efficacy responses prior to initiation of next line therapy are considered to be related to LP-168, even if treatment was terminated early. |
| Supportive care | Treatment policy strategy | Supportive care is part of the study treatment regimen and is consistent with clinical practice. |
| Combined oral administration of CYP3A strong-moderate inhibitors or inducers, OATP1B1/OATP1B3 sensitive substrates, H2 blockers, proton pump inhibitors | Treatment policy strategy | Transient use has limited impact on the assessment of therapeutic reaction. |
| Combination/Initiation of a new anti-cancer therapy | While on treatment strategy | Efficacy outcome after initiation of a new anti-cancer therapy is not related to LP-168. |

**Population-level summary**

Overall response rate (ORR) and its 95% confidence interval will be calculated for the target population. ORR is defined as the percentage of the target population with a best response of CR/PR.

1. **Subject Population**

**6.1 Inclusion Criteria**

Each patient must meet all of the following inclusion criteria to be eligible for inclusion in the study:

1. Men and women ≥ 18 years of age.
2. Patients with histologically confirmed mantle cell lymphoma (MCL) with chromosome translocation t(11;14) and/or overexpress cyclin D1 and/or CCND1 gene rearrangement according to 2017 Revised WHO Classification Criteria for Lymphoma. For these patients, adequate tumor tissue blocks or slides are required to be sent to central laboratory for confirmation of pathological diagnosis.
3. At least one measurable lesion (> 1.5 cm in longest diameter for lymph node lesions or > 1.0 cm in longest diameter for extranodal lesions).
4. Subjects who have failed or relapsed after a prior anti-CD20 mAb-containing regimen and treatment with at least one BTK inhibitor or are intolerant to such therapy (if the subject is previously intolerant to anti-CD20 mAb, only one dose of prior anti-CD20 mAb therapy is allowed; the use of anti-CD20 monoclonal antibodies in combination with BTK inhibitors is permitted within the same line of therapy); or subjects who have failed treatment with a BTK inhibitor or relapsed after or are intolerant to a BTK inhibitor and are ineligible for treatment with an anti-CD20 mAb-containing regimen (see definition of treatment failure, relapse, or intolerance below).
5. Subjects with Eastern Cooperative Oncology Group (ECOG) performance status ≤ 2 points.
6. Subjects with a life expectancy of ≥ 12 weeks as judged by the investigator.
7. Subjects should have adequate coagulation function, and liver and kidney function, and local laboratory tests should meet the following criteria:
8. Coagulation function: prothrombin time (PT) and activated partial thromboplastin time (APTT) ≤ 1.5 x upper limit of normal (ULN);
9. Liver: aspartate aminotransferase (AST) and alanine aminotransferase (ALT) ≤ 3 × ULN; total serum bilirubin ≤ 1.5 × ULN, if there is definite Gilbert syndrome (unconjugated hyperbilirubinemia), total bilirubin ≤ 3.0 × ULN; if hepatic impairment is considered to be caused by liver involvement by lymphoma, AST and ALT ≤ 5 × ULN, and total serum bilirubin ≤ 3.0 × ULN, on the premise that the investigator and sponsor agree to the enrollment after assessment;
10. Pancreas: serum amylase and serum lipase ≤ 1.5 × ULN (with the exception of those without pancreatitis in the judgement of the investigator based on ultrasound, magnetic resonance imaging or CT and other imaging examinations as well as clinical manifestations);
11. Kidney: Serum creatinine (Scr) ≤ 1.5 × ULN, or creatinine clearance (Ccr) ≥ 50 mL/min (calculated by the CockcroftGault formula or using a 24-hour urine sample).

When serum creatinine is expressed in mg/dL:

- When serum creatinine is expressed in μmol/L:

1. Subjects with adequate peripheral blood cell count whose hematology test before the first dose must meet the following criteria:

- Absolute neutrophil count (ANC) ≥ 1.0 × 109/L [independent of granulocyte colony-stimulating factor (G-CSF) within 5 days prior to screening]. The use of colony-stimulating factors is allowed if, in the investigator's judgment, the neutropenia is due to bone marrow involvement by MCL.
- Platelet ≥ 50 × 109/L (without platelet transfusion within 5 days prior to screening; growth factors/cytokines such as TPO and IL-11 are allowed). If platelet decrease is considered to be caused by lymphoma progression, platelet ≥ 30 × 109/L and no obvious hemorrhage diathesis as determined by the investigator.
- Hemoglobin ≥ 8.0 g/dL (without red blood cell transfusion within 7 days prior to screening; growth factors such as EPO are allowed);

1. Toxicity of prior anti-cancer therapy and surgical complications resolved to ≤ Grade 1 according to NCI CTCAE 5.0 (with the exception of alopecia, hematologic toxicity, or other toxicity considered by the investigator to pose no safety risk to subjects after discussion with the sponsor).
2. All male and female subjects of childbearing potential should use medically approved contraceptive measures throughout the treatment period and for 90 days after the end of treatment; females of childbearing potential who are premenopausal (e.g., not menstruated for more than 1 year or not surgically sterilized) must have a negative serum pregnancy test within 7 days prior to the start of treatment (if the screening serum pregnancy result exceeds 7 days, a serum or urine pregnancy test must be performed prior to dosing, and the patient can be enrolled only after the negative result is obtained), and must be in non-lactating period; male subjects are not allowed to donate sperm during the study treatment and for 90 days after the end of treatment.
3. Subjects must be willing to undergo protocol-specified bone marrow examination.
4. Subjects voluntarily participate in the study and sign the informed consent form, and understand and agree to follow the treatment regimen and visit plan.

**6.2 Exclusion Criteria**

Patients who meet any of the following criteria will be excluded from this study:

1. Primary central nervous system lymphoma or central nervous system involvement by lymphoma (including patients with CNS lymphoma in complete response at present);
2. Hypersensitivity to LP-168 or any of its excipients, including microcrystalline cellulose, croscarmellose sodium, magnesium stearate, fumaric acid, and gastro-soluble film coating premix.
3. Subjects who have received treatment with any non-covalent BTK inhibitor.
4. Prior treatment with a BTK-targeted protein degradation chimera.
5. Subjects who have received or been exposed to the following therapies within 4 weeks or within 5 half-lives (whichever is shorter) prior to the first dose of LP-168:

- Anti-cancer therapy including anti-cancer chemotherapy, targeted therapy, biotherapy and/or immunotherapy;
- Any kind of investigational agent;
- Major surgery (generally defined as grade 3 surgery and above) or significant trauma.

1. Subjects who have received the following treatment within 2 weeks prior to the first dose of LP-168:

- Systemic glucocorticoids equivalent to prednisone at doses > 20 mg/day for 3 or more days; or single daily dose > 50 mg;
- Treatment with Chinese herbal medicine for the purpose of anti-cancer;
- Local radiotherapy for the treatment of MCL;
- Strong or moderate CYP3A4/5 inhibitors and inducers, sensitive substrates of OATP1B1/OATP1B3 (see Appendix 3);
- Any drugs known to cause QTc prolongation or torsades de pointes (see Appendix 4).

1. Subjects who require the use of strong or moderate CYP3A inhibitors or inducers, OATP1B1/OATP1B3 sensitive substrates, proton pump inhibitors, and systemic glucocorticoids (equivalent to prednisone > 20 mg/day × 3 days or more) during the study (see Appendix 3).
2. Subjects who have received chimeric antigen receptor T cell (CAR-T) therapy within 90 days prior to the planned first dose of the study drug.
3. Subjects who have received an autologous stem cell transplantation within 90 days prior to the planned first dose of the study drug; Subjects who have undergone allogeneic stem cell transplantation.
4. Subjects with prior malignancy other than MCL within the past 2 years, with the exception of basal cell carcinoma, carcinoma cervix in situ, breast cancer in situ, and localized squamous cell carcinoma curatively treated, as well as malignancies that have been cured by surgery or other treatment as confirmed by the investigator and the sponsor.
5. Subjects with any serious and/or uncontrolled systemic diseases that are not suitable for participation in this study as judged by the investigator (including hypertensive crisis, diabetic ketoacidosis, unstable angina, congestive cardiac failure, respiratory diseases requiring continuous oxygen inhalation, severe vascular embolism, uncontrolled massive hemorrhage or massive organ hemorrhage, severe liver, kidney or metabolic diseases such as decompensated cirrhosis, nephrotic syndrome, etc.).
6. The subjects' ECG at screening showed significant abnormalities, mainly including atrial fibrillation/atrial flutter, second-degree atrioventricular block type 2, third-degree atrioventricular block, bradycardia with CTCAE grade ≥ 2 and QT interval corrected by Fridericia method (QTcF=QT/(RR^0.33), RR=60/pulse value) (QTcF) ≥ 480 ms, etc., and other abnormalities are judged by the investigator to be suitable for participation in the study.
7. Subjects with poor cardiac function, meeting criteria of New York Heart Association (NYHA) class ≥ 2 (NYHA class 2 is defined as Slight limitation of physical activity. Comfortable at rest. Ordinary physical activity results in fatigue, palpitation, shortness of breath or chest pain); or left ventricular ejection fraction (LVEF) < 50% reflected by cardiac ultrasound.
8. Subjects with a history of cerebral infarction, intracranial hemorrhage, myocardial infarction within 180 days before the planned first dose (except for the subjects with lacunar infarction, which is judged by the investigator to not affect the enrollment in this study).
9. Subjects with any of the following infections, including but not limited to:

- Human immunodeficiency virus (HIV) infection, syphilis infection (patients with previous infection, who were cured as judged by the investigator or specialist can be enrolled), positive HBsAg or HBcAb and HBV-DNA test results greater than the ULN of the study site (if HBsAg or HBcAb is positive and HBV-DNA is negative, it is strongly recommended to perform antiviral prophylaxis after enrollment, and monitor HBV-DNA on a regular basis; if HBV-DNA turns positive during treatment, the study drug should be interrupted, and the study drug should be re-administered after negative results are obtained). HCV antibody positive with HCV-RNA test result higher than the upper limit of normal of the study site or qualitatively positive;
- Unexplained fever with body temperature higher than 38.5 ºC within one week prior to the initial administration;
- Uncontrolled systemic active bacterial, fungal, or viral infections.

1. Any condition that affects the drug ingestion of subjects and seriously affects the absorption or pharmacokinetic parameters of the study drug, including uncontrollable nausea and vomiting, as well as short-bowel syndrome, etc.;
2. Presence of conditions that are unfavorable to the administration of the study drug or affect the explanation of drug toxicity or AE; subjects with pre-existing diseases and alcohol or drug abuse/dependence that will result in inadequate compliance with the study.
3. Other conditions that are unsuitable for participation in this trial in the investigator’s opinion.

**6.3 Definition of Treatment Failure, Relapse, or Intolerance, etc.**

1. Treatment failure: patients with best response of PD (if BTK inhibitor is used, the cumulative duration of treatment is required to be no less than 8 weeks) or SD (received at least 4 cycles of immunochemotherapy or at least 24 weeks of BTK inhibitor treatment, patients with best response of SD on last-line treatment should have evidence or trend of disease progression before study entry);
2. Relapse: Evidence of PD in a patient who has previously achieved a CR or PR with response sustained for ≥ 6 months (for subjects who have achieved a response to BTK inhibitor therapy, treatment should in principle be continued until disease progression or for no less than 6 months after achieving a response);
3. Refractory: including treatment failure as defined above or disease progression within 6 months after achieving a response;
4. Unsuitable for anti-CD20 monoclonal antibody-containing immunochemotherapy regimen: patients with del (17p) and/or TP53 mutations or elderly and frail patients (age > 65 years and ECOG PS = 2);
5. Intolerance to a BTK inhibitor: unacceptable toxicity in the opinion of the clinician during treatment with a BTK inhibitor and discontinuation of treatment despite best supportive care for one of the following reasons:

- The same Grade ≥ 2 non-hematologic toxicity persists for more than 7 days and recurs twice or more
- The same Grade ≥ 3 non-hematologic toxicity persists for more than 7 days or recurs twice or more (regardless of duration)
- Grade 4 non-hematologic toxicity (regardless of duration)
- The same Grade ≥ 3 hematologic toxicity persists for more than 7 days and recurs twice or more
- Grade 3/4 neutropenia with infection or pyrexia (regardless of duration)
- Grade 3 thrombocytopenia with clinically significant haemorrhage
- Grade 4 hematologic toxicity persists for more than 7 days, or the same toxicity recurs twice or more (regardless of duration)
- Grade 2 or higher, and the investigator judges that the risk of the adverse event is high (including but not limited to cardiac or cerebrovascular events, severe haemorrhage, severe allergy, etc.)

1. Intolerance to anti-CD20 mAb-containing regimens: allergy to anti-CD20 mAb resulting in inability to receive anti-CD20 mAb treatment.
2. **Study Design**

**7.1 Overall Design Thinking**

This is a single-arm, open-label, multicenter Phase 2 clinical study to evaluate the efficacy and safety of LP-168 in subjects with relapsed or refractory MCL. In this study, it is planned to enroll approximately 62 subjects with MCL who failed, or relapsed after achieving a response or were intolerant to a Bruton's tyrosine kinase (BTK) inhibitor and an immunochemotherapy. Eligible subjects will take LP-168 150 mg with approximately 240 mL of water once daily before meals (except for the period from 1 hour before to 2 hours after a meal) at a fixed time each day as far as possible in 28-day treatment cycles until disease progression, unacceptable toxicity, or satisfaction of other criteria for treatment termination. The primary study endpoint is ORR as assessed by the Independent Review Committee (IRC).

**7.2 Efficacy and Safety Analysis**

An Independent Review Committee (IRC) will be established in this study, and the efficacy data assessed by the IRC will be submitted at the same time as the efficacy data assessed by the investigator.

The primary endpoint of this study is expected to be analyzed no later than 6 cycles after the last subject is dosed.

**7.3 Criteria for End of Treatment**

1. The subject or his/her legal guardian requests to withdraw from the study, e.g., the subject requests to withdraw from the study due to intolerable AEs;
2. The investigator determines that the study treatment should be terminated in the best interests of the subject;
3. Evidence of disease progression;
4. Subject being pregnant during the study;
5. Subject with poor compliance in the opinion of the investigator and/or sponsor;
6. Use of other anti-cancer therapy, including stem cell transplantation;
7. Subject lost to follow-up;
8. Subject died.

As stipulated by the informed consent form, the subject has the right to withdraw from the treatment/trial or withdraw the informed consent, or the subject is lost to follow-up due to no longer receiving medication and testing although the subject does not withdraw the informed consent. The reasons for withdrawal should be understood as much as possible and recorded.

**7.4 Criteria for Termination of the Study**

1. The investigator and sponsor believe that the quantity and severity of serious adverse events (SAE) have reached a degree that requires the early termination of the study.
2. During the study, the investigator and sponsor jointly recognize the existence of drug safety issues and believe that the study continuation would bring serious risks.
3. The sponsor requests the early termination under the premise that the safety and rights and interests of the subjects are fully protected (e.g., for financial reasons or administrative reasons).
4. **Study Steps and Process**

For subjects who intend to participate in the trial, the investigator should explain the benefits and risks of the trial in detail. Before any screening evaluation, subjects who know and sign the informed consent form will be enrolled in the group after the results of all examinations meet the inclusion criteria.

According to the safety data from the Phase I clinical study of LP-168 in patients with B-cell lymphoma, the adverse events (TRAEs, including related, probably related and possibly related) for which the relationship with LP-168 could not be excluded are mainly neutrophil count decreased, upper respiratory tract infection, creatinine increased, subcutaneous bleeding spot, rash, hematuria, platelet count decreased and anemia; Grade ≥ 3 TRAEs included neutrophil count decreased, lung infection, lymphocyte count decreased, etc. In addition, according to the clinical study data of drugs with the same target, infection, haemorrhage, atrial fibrillation and atrial flutter may also occur. In order to timely monitor the occurrence of the above adverse reactions during the study and take corresponding measures to ensure the safety of LP-168 administration, the following study procedures and test items are developed.

**8.1 Screening Period (D-28 ~)**

1. Signing of informed consent form
2. Inclusion/exclusion criteria

Judge whether to enroll a patient according to the inclusion/exclusion criteria. If a patient fails screening, the test results that meet the requirements of the protocol and are still within the time window can be used for re-screening of the subject without repeating the test. Screening examinations are allowed to be repeated based on the investigator's assessment. However, the test results used to determine the inclusion/exclusion criteria are the most recent results before the first administration.

1. Demographics/Medical history/Tumor treatment history

- Demographic data: date of birth, sex, ethnicity, smoking history, family history, marital history, allergy history, reproductive history and menstrual history (female)
- Tumor history: It should be collected including but not limited to the time of initial diagnosis, subtype of MCL (classic, polymorphic or blastic), test results of key markers [ CD20, CD5, cyclinD1, CD21, CD23, SOX11, Ki-67, BCL-2, BCL-6, CD10, TP53 mutation or deletion, IGHV mutation, t (11, 14), CD200, LEF1], Ann Arbor stage at initial diagnosis, MIPI score, IPI score, previous treatment regimen, number of previous treatment lines, best efficacy and achievement time of each line, start and end time of each line of treatment, reason for end of each line of treatment, time of disease progression, involvement of central nervous system/bone marrow/gastrointestinal tract, etc.
- Previous anti-cancer treatment: history of chemotherapy, radiotherapy, immunotherapy, molecular targeted therapy, cell therapy and hematopoietic stem cell transplantation, etc.
- Concomitant diseases

1. Recording of concomitant medication

- Including drug name, drug dose, route of administration, frequency of administration, start date, reason for administration, and end date, and must be from signing of informed consent form until Day 28 after the last administration.

1. Physical examination
2. Vital signs: measured after resting for at least 5 minutes, including pulse, blood pressure, respiration rate and body temperature;
3. ECOG performance status score;
4. B symptoms
5. Tumor prognosis evaluation and staging

- IPI score
- MIPI score
- Ann Arbor staging

1. Tests by local laboratory and relevant departments

- Hematology
- Blood biochemistry (including LDH)
- Serum amylase and lipase
- Coagulation function
- Blood beta 2 microglobulin
- Viral testing: hepatitis B five items [hepatitis B surface antigen (HBsAg), hepatitis B surface antibody (HBsAb), hepatitis B e antigen (HBeAg), hepatitis B e antibody (HBeAb), hepatitis B core antibody (HBcAb), HBV-DNA copy number detection must be performed for patients with positive HBsAg or HBcAb (within the normal range (i.e., negative) for enrollment)]; hepatitis C antibody [subjects with positive hepatitis C virus antibody (HCV) must have HCV-RNA tested (those with HCV-RNA below the upper limit of normal value of the study site can be enrolled)]; HIV; syphilis
- Urinalysis;
- Stool routine + occult blood
- Quantitation of blood immunoglobulin: including IgG, IgA and IgM
- Serum or urine pregnancy test: for women of childbearing potential who are premenopausal (if not amenorrheic for > 1 year and not surgically sterilized), a serum pregnancy test is required within 7 days prior to initiation of treatment, and the result must be negative
- 12-lead ECG: at least 10 minutes rest before each examination, and the examination should be repeated in triplicate at least 5 minutes apart
- Echocardiogram
- FDG PET/CT: if PET/CT conducted at the study site following the last anti-MCL treatment is within 28 days before the initial administration of the study, and is considered by the investigator and sponsor to meet the criteria, it can serve as the baseline data for this study, and there is no need to repeat the examination.
- Enhanced CT (neck, chest, abdomen, pelvis): If the patient has special circumstances such as allergy to contrast medium, CT plain scan, enhanced MRI or MRI plain scan may be considered for examination, but the same radiological examination is required to be used for each efficacy evaluation of the same subject. If the imaging examination conducted at the study site following the last anti-MCL treatment is within 28 days before the initial administration of the study, and is considered by the investigator and sponsor to meet the criteria, it can serve as the baseline data for this study, and there is no need to repeat the examination.
- Cranial MRI (subjects with suspected CNS involvement by lymphoma)
- Gastrointestinal endoscopy [it is recommended for all subjects (not mandatory), and must be performed for patients with intestinal involvement as indicated by baseline imaging and/or previous endoscopy]: if the endoscopy conducted at the study site following the last anti-MCL treatment is within 28 days before the initial administration of the study, and is considered by the investigator and sponsor to meet the criteria, it can serve as the baseline data for this study, and there is no need to repeat the examination.

1. Central laboratory tests:

- Bone marrow biopsy: if the bone marrow biopsy performed at the study site after the last anti-MCL therapy is performed within 60 days of the initial administration of the study, and is determined to be satisfactory by the investigator and the sponsor, the above-mentioned satisfactory bone marrow tissue sample can be sent to the central laboratory for re-testing and used as the baseline data of the study without repeat aspiration.
- FISH del (17p) testing [optional, but this testing and/or TP53 mutation testing are mandatory for subjects with unknown chromosome 17p status and without prior anti-CD20 antibody use (excluding patients who are not eligible for anti-CD20 antibody treatment)].
- NGS testing: optional
- Pathology and immunohistochemistry: Pathological diagnosis should be confirmed at baseline, and lymphoma tissues or cells at baseline should be used for detection as far as possible. If unavailable, previous lymphoma tissue sections can be used for testing. If the test results are inconsistent with the previous results, the test results from the central laboratory at screening will prevail. Enrolled subjects must provide adequate tumor tissue blocks or slides for confirmation of pathological diagnosis by the central laboratory.
- TP53 mutation [optional, but this testing and/or FISH del (17p) testing must be completed in subjects with undefined TP53 status and without anti-CD20 antibody use (excluding patients who are not eligible for anti-CD20 antibody treatment)].

**8.2 Baseline Period (D-1)**

1. Review of inclusion/exclusion criteria
2. Concomitant medication assessment
3. Physical examination
4. Vital signs, including pulse, blood pressure, respiratory rate, temperature
5. Tests by local laboratory and relevant departments

- Hematology (may also be performed before administration on C1D1)
- Blood biochemistry (may also be performed before administration on C1D1)
- Urinalysis (may also be performed before administration on C1D1)
- Serum or urine pregnancy test: For women of childbearing potential only, if the serum pregnancy result during the screening period exceeds 7 days, a pre-dose serum or urine pregnancy test must be conducted to obtain a negative result before enrollment
- 12-lead ECG in triplicate (may also be performed before administration on C1D1)

1. Quality of life assessment: EORTC QLQ-C30 assessment

**8.3 Treatment and Observation Periods**

In the treatment and observation period of the study, LP-168 150 mg will be administered once daily before meals (except for the period from 1 hour before to 2 hours after a meal) at a fixed time each day as far as possible in 28-day treatment cycles until disease progression, unacceptable toxicity, or satisfaction of other criteria for treatment termination. On the day of the safety follow-up, if the investigator determines that the subject is safe, it is not necessary to wait for the test results on the same day before administration.

**Cycle 1 Day 1 (D1) (before administration, unless otherwise specified)**

1. Recording of adverse events and concomitant medications (medical events that occurr before administration are recorded as medical history, and adverse events are recorded starting after administration)
2. Physical examination
3. Vital signs: measured within 2 hours before administration and 2-4 hours after administration
4. 12-lead ECG: 2-4 hours after administration, 3 consecutive measurements at least 5 minutes apart. If ECG is not performed on D-1, it is required to continuously test 3 times pre-dose, with an interval of at least 5 minutes each time.
5. Urinalysis (4-8 hours post-dose)
6. Quality of life assessment: EORTC QLQ-C30 assessment
7. Dispensation of the study drug
8. Distribution of diary card

**Cycle 1 Day 8 (D8 ± 1) (before administration, unless otherwise specified)**

1. Documentation of AEs and concomitant medications
2. Physical examination
3. Vital signs: examined within 2 hours prior to administration
4. Hematology
5. Blood biochemistry (including LDH)
6. Urinalysis
7. 12-lead ECG: at least 10 minutes rest before each examination, and the examination should be repeated in triplicate at least 5 minutes apart

**Cycle 1 Day 15 (D15 ± 1) (before administration, unless otherwise specified)**

1. Documentation of AEs and concomitant medications
2. Physical examination
3. Vital signs: measured within 2 hours before administration and 2-4 hours after administration
4. Hematology
5. Blood biochemistry (including LDH)
6. Urinalysis
7. 12-lead ECG: before administration and 2-4 hours after administration. At least 10 minutes rest before each examination, and the examination at each time point should be repeated in triplicate at least 5 minutes apart
8. PK blood collection:

- PK intensive sampling: some subjects enrolled at some study sites are planned to undergo intensive sampling of plasma samples. The total number of subjects undergoing PK intensive sampling is not less than 15. Sampling time points: within 1 h before administration on the day of visit (or 24 h ± 30 min after administration on the day before this visit, whichever comes first), and 0.5 h ± 3 min, 1 h ± 5 min, 2 h ± 5 min, 3 h ± 5 min, 4 h ± 5 min, 6 h ± 5 min, 8 h ± 10 min and 24 h ± 30 min after administration on the day of visit (to be collected before administration on C1D16). Subjects who undergo PK intensive sampling will not undergo PK sparse sampling on C1D15, but will still be required to undergo PK sparse sampling on C1D28 and thereafter. In case of dose interruption or misadministration, the corresponding blood collection point is allowed to be postponed or cancelled, the same as below.
- Sparse pharmacokinetic sampling: within 1 hour before administration on the day of visit (or 24 h ± 30 min after administration on the day prior to the day of visit, whichever comes first) and 2 h ± 10 min after administration.

**Cycle 1 Day 28 (D28 ± 1) (before administration, unless otherwise specified)**

1. Documentation of AEs and concomitant medications
2. Physical examination
3. Vital signs: examined within 2 hours prior to administration
4. ECOG PS
5. Hematology
6. Blood biochemistry (including LDH)
7. Coagulation function
8. Urinalysis
9. Serum/urine pregnancy test (females of childbearing potential)
10. 12-lead ECG: at least 10 minutes rest before each examination, and the examination should be repeated in triplicate at least 5 minutes apart
11. PK blood collection:

- Sparse pharmacokinetic sampling: within 1 hour before administration on the day of visit (or 24 h ± 30 min after administration on the day prior to the day of visit, whichever comes first) and 2 h ± 10 min after administration.

1. Quality of life assessment: EORTC QLQ-C30 assessment
2. Study drug dispensing and return
3. Diary card dispensing and collection

**Cycle 2 Day 28 (D28 ± 3) - Cycle 8 Day 28 (D28 ± 3) (before administration, unless otherwise specified)**

1. Documentation of AEs and concomitant medications
2. Physical examination
3. Vital signs: within 2 hours prior to administration
4. ECOG PS
5. Hematology
6. Blood biochemistry (including LDH)
7. Coagulation function
8. HBV-DNA and/or HCV-RNA: HBV-DNA should be re-examined every 2-3 cycles for subjects with positive HBsAg or positive HBcAb. HCV-RNA should be re-examined every 2-3 cycles for subjects who are hepatitis C antibody positive and have been cured without prior systemic anti-hepatitis C therapy.
9. Urinalysis
10. Serum/urine pregnancy test (females of childbearing potential)
11. 12-lead ECG: ECG should be performed once after resting for at least 10 minutes. If there is QT increased, it can be performed twice more. The mean QTcF value of the three ECGs will be used as the final QTcF value.
12. FDG PET/CT (even-numbered cycles only): If target lesions are sensitive to PET/CT (Deauville five-point scale: ≥ 4), PET/CT will be used concurrently for effectiveness assessment, and subjects who achieve CMR may be assessed for their conditions solely through CT until disease progression is considered. If target lesions are not sensitive to PET/CT, the investigator may determine whether to continue using PET/CT to assess the effectiveness.
13. Contrast-enhanced CT (neck, chest, abdomen, and pelvis) (even-numbered cycles only)
14. Cranial MRI: when central nervous system involvement is suspected
15. Gastrointestinal endoscopy: For patients with intestinal involvement indicated by baseline imaging and/or endoscopic examination, the re-examination is required when imaging examination indicates CR. The examination may no longer be performed after the response is assessed as CR, unless the investigator determines that there is a clinical need.
16. Bone marrow biopsy: For subjects with baseline bone marrow involvement only, bone marrow biopsy is required to confirm CR when the disease is considered achieving CR. Subjects with negative initial bone marrow biopsy results for CR assessment do not require receiving bone marrow biopsy again for confirmation.
17. Effectiveness evaluation (even-numbered cycles only)
18. PK blood collection (C2D28 ± 3 days, C3D28 ± 3 days, and C4D28 ± 3 days only):

- Sparse pharmacokinetic sampling: within 1 hour before administration on the day of visit (or 24 h ± 30 min after administration on the day prior to the day of visit, whichever comes first) and 2 h ± 10 min after administration.

1. Quality of life assessment: EORTC QLQ-C30 assessment
2. Study drug dispensing and return
3. Diary card dispensing and collection
4. NGS (at disease progression): optional

**Cycle 11 Day 28 (D28 ± 3), Cycle 14 Day 28 (D28 ± 3), Cycle 17 Day 28 (D28 ± 3) … (every 3 cycles) (before administration, unless otherwise specified)**

1. Documentation of AEs and concomitant medications
2. Physical examination
3. Vital signs: examined within 2 hours prior to administration
4. ECOG PS
5. Hematology
6. Blood biochemistry (including LDH)
7. Coagulation function
8. HBV-DNA and/or HCV-RNA: HBV-DNA should be re-examined every 2-3 cycles for subjects with positive HBsAg or positive HBcAb. HCV-RNA should be re-examined every 2-3 cycles for subjects who are hepatitis C antibody positive and have been cured without prior systemic anti-hepatitis C therapy.
9. Urinalysis
10. Serum/urine pregnancy test (females of childbearing potential)
11. 12-lead ECG: ECG should be performed once after resting for at least 10 minutes. If there is QT increased, it can be performed twice more. The mean QTcF value of the three ECGs will be used as the final QTcF value.
12. FDG PET/CT: If target lesions are sensitive to PET/CT (Deauville five-point scale: ≥ 4), PET/CT will be used concurrently for effectiveness assessment, and subjects who achieve CMR may be assessed for their conditions solely through CT until disease progression is considered. If target lesions are not sensitive to PET/CT, the investigator may determine whether to continue using PET/CT to assess the effectiveness.
13. Contrast-enhanced CT (neck, chest, abdomen, and pelvis)
14. Cranial MRI: when central nervous system involvement is suspected
15. Gastrointestinal endoscopy: For patients with intestinal involvement indicated by baseline imaging and/or endoscopic examination, the re-examination is required when imaging examination indicates CR
16. Bone marrow biopsy: For subjects with baseline bone marrow involvement, bone marrow biopsy is required to confirm CR when the disease is considered achieving CR
17. NGS (at disease progression): optional
18. Efficacy evaluation
19. Quality of life assessment: EORTC QLQ-C30 assessment
20. Study drug dispensing and return
21. Diary card dispensing and collection

**End-of-treatment visit (EOT evaluation)**

For patients with the study treatment terminated during the treatment period, the EOT evaluation should be performed within 7 days after the last dose. For patients with the treatment terminated at or within 7 days after a study visit, the EOT evaluation is not required to be repeated.

**The EOT evaluation includes the following:**

1. Documentation of AEs and concomitant medications
2. Physical examination
3. Vital signs
4. ECOG PS
5. Hematology
6. Blood biochemistry (including LDH)
7. Coagulation function
8. HBV-DNA and/or HCV-RNA: HBV-DNA should be re-examined every 2-3 cycles for subjects with positive HBsAg or positive HBcAb. HCV-RNA should be re-examined every 2-3 cycles for subjects who are hepatitis C antibody positive and have been cured without prior systemic anti-hepatitis C therapy.
9. Urinalysis
10. Serum/urine pregnancy test (females of childbearing potential)
11. 12-lead ECG: ECG should be performed once after resting for at least 10 minutes. If there is QT increased, it can be performed twice more. The mean QTcF value of the three ECGs will be used as the final QTcF value.
12. Quality of life assessment: EORTC QLQ-C30 assessment
13. Recovery of the study drug
14. Collection of diary card

**Safety follow-up**

This visit will be completed 28 days (+7 days) after the last dose of LP-168 in the patient or prior to initiation of a new antineoplastic regimen, whichever occurs first (the safety visit may not be repeated if it occurs no more than 7 days from the EOT visit), unless the subject refuses, dies, is lost to follow-up, or withdraws consent.

Patients who discontinue the study treatment should be informed of the reasons for their discontinuation and any existing AEs, except for patients who complete the treatment according to the study protocol. If possible, such patients should be evaluated by the investigator and return the study drug, and AEs shall be followed up. The investigator should notify the sponsor, Guangzhou Lupeng Pharmaceutical Co., Ltd., of the discontinuation of the study treatment within 48 hours.

At the time of discontinuation of the study treatment, all AEs or SAEs that are already present or new within 28 days after the last dose should be followed until resolution, stabilization/return to baseline, unless the investigator believes that they are unlikely to be alleviated due to the diseases of patients.

**The safety visit will include the following:**

1. Documentation of AEs and concomitant medications
2. Physical examination
3. Vital signs
4. ECOG PS
5. Hematology
6. Blood biochemistry (including LDH)
7. Coagulation function
8. HBV-DNA and/or HCV-RNA: HBV-DNA should be re-examined every 2-3 cycles for subjects with positive HBsAg or positive HBcAb. HCV-RNA should be re-examined every 2-3 cycles for subjects who are hepatitis C antibody positive and have been cured without prior systemic anti-hepatitis C therapy.
9. Urinalysis
10. Serum/urine pregnancy test (females of childbearing potential)
11. 12-lead ECG: ECG should be performed once after resting for at least 10 minutes. If there is QT increased, it can be performed twice more. The mean QTcF value of the three ECGs will be used as the final QTcF value.
12. Quality of life assessment: EORTC QLQ-C30 assessment

**Disease follow-up**

Any subject who withdraws from the study treatment for reasons other than disease progression/relapse (except for complete withdrawal of informed consent, loss to follow-up, or death of the subject) is encouraged to continue to receive tumor assessment every 12 weeks (± 7 days) until disease progression or relapse, death, withdrawal of informed consent, loss to follow-up, or receiving other anti-cancer therapy (whichever occurs first).

**The disease follow-up includes the following:**

1. Physical examination
2. FDG PET/CT
3. Contrast-enhanced CT (neck, chest, abdomen, and pelvis)
4. Cranial MRI: when central nervous system involvement is suspected
5. Gastrointestinal endoscopy
6. Bone marrow biopsy.
7. Efficacy evaluation
8. Quality of life assessment: EORTC QLQ-C30 assessment

**Survival follow-up**

After disease progression or withdrawal from the study due to reasons other than disease progression but refusing disease follow-up or starting new anti-cancer treatment, all subjects are encouraged to continue to receive telephone contact every 12 weeks (± 7 days). The contact persons may be the subjects, the subjects' family members or the subjects' current treating physicians, so as to obtain the relevant data of overall survival and post-study anti-cancer treatment of the subjects until their death, refusal to follow-up or loss to follow-up. The following information should be obtained at each follow-up visit: survival status, and recording of all anti-cancer therapies and dates of death, and causes of death (if applicable).

**8.4 Study Precautions**

All enrolled patients of childbearing potential should take medically approved contraceptive measures throughout the treatment period and within 90 days after the end of treatment; acceptable methods of contraception include abstinence, condom use, tubal ligation, oral or transdermal contraceptives, intrauterine device, and vasectomy. All methods for hormonal contraception should be used in conjunction with condoms.

Male subjects should refrain from donating sperm during the study and within 90 days after the end of treatment.

Patients who become pregnant during the trial must discontinue treatment. For patients who become pregnant, all tumor assessments must be discontinued regardless of disease progression.

After termination of administration in all patients participating in this clinical trial, the safety evaluation of all pre-existing AEs or SAEs as well as those newly occurring within 28 days after the last dose should be continuously followed up until resolution, stabilization/return to baseline, unless the investigator believes that they are unlikely to be alleviated due to the underlying diseases of patients.

If there is a trend of improvement in symptoms during the observation period of the trial, follow-up should be continued and the results should be recorded, so as to provide the basis for further trials.

All concomitant medications used during this clinical trial should be recorded on the eCRF. Adverse events occurring during the treatment period and observation period of the investigational drug should be actively handled, and the name, dose, usage and course of treatment of the drug used should be recorded on the eCRF in detail.

During this clinical study, the investigator will comprehensively evaluate the patient's condition, and may add necessary additional examinations during the trial, including safety examination and effectiveness evaluation.

In case of force majeure such as holidays or epidemic control, the time of safety examination or tumor assessment beyond the time window specified in the protocol will not be considered as a protocol violation.

**8.5 Evaluation Criteria for Effectiveness and Toxicity**

Toxicity should be evaluated according to the National Cancer Institute Common Terminology Criteria for Adverse Events (NCI CTCAE version 5.0). Safety parameters include adverse events (AEs), vital signs, ECOG performance score, physical examination, laboratory tests, electrocardiogram and cardiac ultrasound.

For the effectiveness evaluation criteria, refer to the Lugano 2014 Response Criteria for Non-Hodgkin's Lymphoma (NHL). See Appendix 5.

**8.6 Concomitant Medications**

Before enrollment and during the trial, except for prohibited treatments specified otherwise, drugs considered by the investigator to alleviate and treat patients' relevant symptoms are allowed. All concomitant medications and medical and surgical procedures should be recorded on the eCRF from the screening period and after the start of the study drug treatment, including chemical drugs, Chinese herbal medicines/natural medicines, surgeries and procedures (including physical therapy) used after signing the informed consent form and until 28 days after the last dose of LP-168 or before the start of a new anti-cancer treatment regimen. Drug therapies include not only drugs prescribed by doctors, but also all over-the-counter drugs, Chinese herbal medicines and vitamin supplements.

**Permitted Concomitant Medications During the Study:**

Subjects may receive best supportive care during the study, including hematopoietic growth factors (G-CSF is strongly recommended when ANC is below 0.5 × 109/L), blood transfusion/blood product therapy, fluid and electrolyte supplementation, and antiemetic, antidiarrheal, analgesic and appropriate anti-infective therapies. Potential drug-drug interactions need to be considered when using concomitant medications.

Glucocorticoids are allowed to treat complications during the study. If systemic use is required for 3 or more consecutive days, the dose of prednisone should be ≤ 20 mg/day (or equivalent dose of other glucocorticoids) (topical glucocorticoids, such as inhalation and topical use, are not limited; dexamethasone at the intrathecal injection dose not exceeding 5 mg is allowed). Temporary use of a higher dose of corticosteroids (total daily dose shall be no more than 50 mg prednisone or equivalent glucocorticoids) for 2 consecutive days is allowed. If it is necessary to use glucocorticoids beyond the above standard dose due to the disease, the efficacy analysis of the patient will be handled according to the new anti-cancer treatment. However, if the investigator believes that the subject would benefit from continued treatment with the study drug, continued medication of the study drug as per protocol during and after the period of corticosteroid overdosing may be considered. Safety data from subjects will continue to be collected.

Subjects who require to take H2 blockers (see Appendix 3) are not allowed to take these drugs until 2 h after administration of LP-168.

If the increase of lymphocyte occurs during treatment, the investigator can use leukapheresis as required by the disease condition.

**Prohibited Concomitant Medications and Treatments During the Study:**

1. Any study drugs;
2. Local radiotherapy of tumor lesions;
3. Any drugs with anti-cancer indication, including Chinese herbal medicine (but cytarabine, methotrexate, and dexamethasone are allowed for intrathecal injection for prevention of central nervous system lymphoma);
4. Systemic glucocorticoids exceeded the allowed doses or duration of treatment as mentioned above (equivalent to prednisone at doses > 20 mg/day for 3 or more days; or single daily dose > 50 mg, see above for details);
5. OATP1B1/OATP1B3 sensitive substrates (see Appendix 3);
6. Proton pump inhibitors (refer to Appendix 3) (if such drugs are required based on the subject's condition and investigator's judgment, it is allowed to use them for a maximum of 14 days. The study drug, LP-168, should be interrupted during the medication period, and after taking the last dose of a proton pump inhibitor, it is still necessary to elute for at least 72 hours before the study drug is continued);
7. Strong and moderate CYP3A4/5 inhibitors and inducers (see Appendix 3);
8. Any drugs known to cause QTc prolongation or torsades de pointes (see Appendix 4).

**8.7 Dose Interruption and Modification**

During the study, if the subject experiences intolerable adverse events that are considered to be possibly related, probably related or related to the study drug, dose interruption is allowed, and the dose of LP-168 will be modified according to the severity of the toxicity. Note: If, based on the investigator's assessment, the following toxicities are judged not to cause serious harm to the subject and it is believed that the benefits to the subject outweigh the risks, the dose modification or discontinuation of the study drug may be determined after discussion with the sponsor.

If Grade 4 hematologic toxicity, Grade 3 febrile neutropenia, Grade 3 platelet count decreases in the presence of bleeding, or ≥ Grade 3 non-hematologic toxicity (excluding toxicities that, in the judgment of the investigator, do not affect the subject’s safety) occurs and is considered possibly related, probably related, or related to the study drug, the subject should interrupt the study drug until the toxicity has resolved to ≤ Grade 1 or baseline levels (symptomatic and supportive treatment is allowed for achieving this criterion. For AEs considered to be caused by both the underlying disease and the study drug, the decision on whether to interrupt the study drug and when to resume the study drug may be made after discussion between the investigator and the sponsor’s medical monitor) (for cytopenia meeting the Grade 3 criteria at screening, if the Grade 4 hematologic toxicity criteria are met after treatment, the study drug may be continued after the investigator assesses the risk/benefit ratio of the subject and the sponsor approval is obtained.) The study drug must be permanently discontinued for subjects who do not recover to Grade ≤ 1 or baseline within 28 days (unless the investigator believes that the subject can benefit from continued use of the study drug and the medical approval is obtained from the sponsor). If the above toxicities occur for the first time, the investigator can determine whether the dose of the study drug needs to be modified according to the specific conditions of the subject when the study drug is resumed. However, if the above toxicities occur again after the use of the same dose of the study drug, the dose should be reduced to 125 mg QD. If the same grade of toxicity recurs after a dose reduction, the dose should be reduced to 100 mg QD. If the subject is administrated with 125 mg QD or 100 mg QD for more than 1 cycle and the grade of toxicities does not worsen or further improves, the investigator can decide whether to escalate the dose according to the individual conditions of the subject (but only one dose escalation is allowed for each subject). If the same grade of toxicity recurs after a dose reduction, the study drug must be permanently discontinued (in exceptional cases, treatment may be continued only after discussion between the investigator and the sponsor’s medical monitor). If HBV-DNA/HCV-RNA is positive during treatment, the study drug should be interrupted. The treatment with the study drug can only be resumed after receiving anti HBV or HCV treatment and testing negative or returning to normal levels.

1. **Study Drug**

**9.1 Name, Physicochemical Properties, Strength and Storage of the Drug**

1. Drug Name: LP-168 tablets
2. Physicochemical properties: pink oval film-coated tablets, slightly yellow after removing the coating, insoluble in water, soluble in methanol, acetone, acetonitrile, tetrahydrofuran, freely soluble in dimethylsulfoxide, N, N-dimethylformamide, dichloromethane
3. Tablet strength: 25 mg, 100 mg
4. Packing size: 30 tablets/bottle
5. Shelf life: 24 months tentatively
6. Storage: Store in tightly closed containers at a temperature not exceeding 25 ºC

**9.2 Drug Packaging and Labeling**

The label shall include drug name, strength, packing size, posology and method of administration, storage, precautions, batch number, drug number, expiry date, protocol number, subject number and clinical trial applicant, and indicate “for clinical trials only”.

**9.3 Screening Number**

The patient having signed the ICF will be assigned with a 5-digit screening number, with first two digits as site number, and the rest three digits as sequence number, starting from 001. For example, 01005 refers to the 5th screened patient at site 01.

In this study, subjects are allowed to be re-screened (up to 2 times). Rescreened subjects need to re-sign the informed consent form and will be assigned a new screening number.

**9.4 Enrollment Number**

Each subject will be assigned an enrollment number. The number will be three digits, which will start from 001 and increase in enrollment sequence. If a subject is the third subject enrolled in this study, the enrollment number will be 003.

The enrollment number of each subject remains unchanged throughout the clinical trial. Once an enrollment number has been assigned to a subject, it will not be re-assigned to any other subject.

**9.5 Receipt, Dispensing and Return of Study Drug**

Guangzhou Lupeng Pharmaceutical Co., Ltd. will transport the study drug to the clinical study site according to standard operating procedures, and the study drug will be stored and kept according to the requirements in this protocol.

Upon receipt of the study drug, study personnel should make an inventory of the study drug; receipt and transportation information should be maintained in the investigator's administrative file; the following items should be recorded: quantity received and stored; batch number on the label; date of storage, transfer in and out of the drug; name of clinical investigator; number of dispensed and returned drugs for each subject; name of the investigator who received the batch.

All the study drugs can only be dispensed by authorized study personnel. Once the study is completed, if all unused drugs or empty bottles are not authorized to be destroyed locally by Guangzhou Lupeng Pharmaceutical Co., Ltd., the clinical research associate of Guangzhou Lupeng Pharmaceutical Co., Ltd. will recover the drugs or empty bottles together with the corresponding use records.

**9.6 Subject Compliance**

**Judgment on medication compliance:**

The dosage and time of administration of LP-168 for each subject should be recorded in the eCRF. Reasons for delayed administration, dose reductions, or missed doses should also be recorded in the eCRF.

Subject compliance with the treatment and protocol includes voluntary compliance with all aspects of the protocol, including compliance with all blood collections necessary for safety evaluation.

Medication compliance = actual dose taken by the subject/dose to be taken by the subject. If the subject compliance is < 80% or > 120%, the compliance is considered as poor; if the compliance is < 70%, the case will be excluded from the PPS analysis, but should still be included in the ITT analysis.

**Management measures for missed doses:**

Subjects will be advised that if a dose of the study drug is not taken at the scheduled time,they should take the missed dose as soon as possible. For patients receiving once daily dosing, the missed dose should be administered at least 12 hours before the next dose. If the time to next dose is less than 12 hours, the missed dose should not be administered and the next dose should be taken as scheduled.

In case of vomiting of the drug, there is no need to take an additional dose and the next dose should be taken as scheduled. If vomiting persists, the investigator should treat it promptly. In case of adverse events of nausea and vomiting, antiemetics can be used for supportive treatment.

1. **Pharmacokinetic and Pharmacodynamic Studies**

Pharmacokinetic sampling time points will be designed according to the guidelines for pharmacokinetics and by referring to the human plasma concentration-time curve obtained from clinical studies and the data of similar drugs. Relevant contents of the pharmacokinetic study may be revised in the future based on the results of the phase study.

**10.1 Study Procedures**

It is suggested that subjects participating in the PK intensive sampling fast for more than 8 hours on the night prior to the PK intensive sampling day, but water fasting is not required overnight. The drug should be taken orally within the specified time on the next day, with about 240 mL of water before meals (except for the time period from 1 hour before to 2 hours after meals). Water fasting is required (except water for dosing) within 1 hour before and 2 hours after dosing, and food fasting is required for 2 hours after dosing. Blood samples will be collected at different time points before and after administration as per the study protocol. During hospitalization in the ward, subjects should avoid strenuous exercise, refrain from tea, coffee, grapefruit juice and other diet containing caffeine, alcohol or grapefruit juice, and refrain from smoking. On the days when subjects participate in PK sparse sampling, the study drug will be administered according to the dosage and administration specified in the study protocol, and blood samples will be collected at each time point specified below, with no other special restrictions.

**10.2 Pk Blood Sampling Time**

During the pharmacokinetic study, 3 mL of blood sample will be collected at each blood sampling time point in the corresponding study cycle as specified in this protocol for pharmacokinetic study. Depending on the progress of clinical development, pharmacokinetic-related studies such as metabolite identification, sources of pharmacokinetic variability may also be conducted. In case of dose interruption or misadministration, PK blood sampling is allowed to be postponed or cancelled.

**10.3 PK** **Intensive Sampling**

PK intensive sampling is planned in this study: Some subjects enrolled in some study sites are planned to undergo intensive sampling of plasma samples for pharmacokinetic study. The total number of subjects undergoing PK intensive sampling is not less than 15. Sampling time points: within 1 h before administration on the day of C1D15 (± 1 day) visit (or 24 h ± 30 min after administration on the day before this visit, whichever comes first), and 0.5 h ± 3 min, 1 h ± 5 min, 2 h ± 5 min, 3 h ± 5 min, 4 h ± 5 min, 6 h ± 5 min, 8 h ± 10 min and 24 h ± 30 min after administration on the day of C1D15 (± 1 day) visit (to be collected before administration on C1D16). Subjects who undergo PK intensive sampling will not undergo PK sparse sampling on C1D15, but will still be required to undergo PK sparse sampling on C1D28 and thereafter.

**10.4 PK Sparse Sampling**

PK sparse sampling is planned in this study: All subjects enrolled in this study are required to undergo sparse sampling of plasma samples at the time points pre-specified in the protocol for population pharmacokinetic study. Sampling time points: within 1 h before administration (or 24 h ± 30 min after administration on the day before the visit, whichever comes first) and 2 h ± 10 min after administration on C1D15 (± 1 day), C1D28 (± 1 day), C2D28 (± 3 days), C3D28 (± 3 days) and C4D28 (± 3 days).

**10.5 Time Recording**

The specific time of administration must be recorded. For each sample, in addition to the scheduled time point, the specific collection time should be recorded.

**10.6 Sample Transportation**

Pharmacokinetic and pharmacodynamic analysis and testing of this study can be conducted in a third-party testing center as appropriate. The collected biological samples will be transported at low temperature by a designated professional courier to a third-party testing center for storage.

**10.7 Sample Analysis Method**

Concentrations of LP-168 and its major metabolite (if any) will be determined by LC-MS/MS. The method will be validated by a designated third-party testing and analysis laboratory in accordance with relevant regulations and guidelines.

1. **Data Management**

Prior to clinical trial data management, the data management personnel should develop a data management plan (DMP) according to the protocol and the actual situation of the project. The data management plan should include the main work contents of data management and important timelines of data management process, and define clearly the responsibilities of relevant personnel. The data management plan should be executed after being jointly signed by the data management personnel and the sponsor.

**11.1 CRF Design**

The electronic case report form (eCRF) is designed according to the clinical trial protocol to ensure that all the clinical data required by the trial protocol will be collected.

The first draft of eCRF will be completed by the sponsor or contract research organization (CRO), and should be reviewed jointly by data management personnel, statisticians, investigators, medical personnel, etc. The final eCRF should be approved by the sponsor and comply with the protocol and relevant laws and regulations. The eCRF design, preparation, approval, and version control process must be fully documented.

**11.2 Database Creation**

Electronic data capture (EDC) system will be used for data entry and data management in this clinical trial.

The database shall be created according to the clinical trial protocol, eCRF and annotated CRF (aCRF), and shall comply with the structure and setup of a standard database to the greatest extent, so as to ensure data integrity. The database manager or programmer shall write the data entry quality control program and edit check (EC) program and configure the center, authority distribution and other functions according to the data validation plan (DVP) and the project requirements.

After the database is established, each role shall test the database, and the EDC system shall be officially released after all the tests have passed. The database test reports shall be signed and confirmed by the person in charge of data management.

**11.3 Data Entry**

Investigators or clinical trial coordinators (CRCs) should be trained in the operation of the EDC system and data entry prior to study initiation. After initiation, the investigator or CRC is required to collect the subject data according to the requirements of the study protocol. The clinical research associate (CRA) was required to perform source data verification (SDV) on the eCRFs. The investigator or CRC shall accurately, timely, completely and normatively enter the data into the EDC system according to the original data and referring to the EDC entry guidelines. The entry and modification of clinical trial data shall follow the standard operating procedures, and the operation traces of entry and modification shall be retained.

**11.4 Data Query**

After the investigator or CRC completes data entry, the CRA performs online source data verification (SDV), and can send queries online if any inconsistent data with the source data is found. After data is entered into EDC and/or after SDV, data management personnel (DM) and medical personnel shall check the data through system query, manual query and other forms. After the query is issued, the investigator or CRC will confirm and answer the query, and correct the incorrect data if necessary, until the query is resolved. All of the above operations are retained in the EDC system.

**11.5 SAE Consistency Verification**

It includes consistency verification of all data points related to SAE in the eCRF with those in the pharmacovigilance (PV) database and/or SAE report, query the inconsistent data, and communicate with PV personnel until there is no discrepancy in the data.

**11.6 Medical Coding**

All adverse events and pre-existing conditions collected in clinical trials will be medically coded by system organ class (SOC) and preferred term (PT) using the Medical Dictionary for Regulatory Activities (MedDRA). Prior and concomitant medications will be coded using the latest version of the WHO Drug Dictionary (WHODD). The coded dataset should clearly record the dictionary and version used for coding. Medical coding should be completed prior to database locked.

**11.7 Data Review and Lock**

Data review should be performed by the principal investigator, statistician, data manager and sponsor before database locked. In addition to reviewing the unresolved problems in data management process, reviewing the reports and handling records of serious adverse events, reviewing the data review of inclusion and exclusion criteria, dropouts, missing values, compliance, adverse events and concomitant medications, the population division and statistical analysis plan should be further discussed and confirmed.

Database locked is an important milestone in the process of clinical study. The locking is to cancel the permission to edit the database. The written approval from the principal investigator, statistician, data manager and sponsor should be obtained before the database locked. The locking process and time should be clearly documented. All data were finally exported from the EDC system by the data manager and handed to the statistician for analysis. The final data were backed up in three copies at the same time, one of which was kept by the sponsor, the principal investigator and the statistical analysis unit, respectively.

After database locked and unlock, this process must be carefully controlled, locked data files can not be changed unilaterally. For the problems found after database locked, the application should be submitted and fully discussed, and the implementation can only be implemented after being jointly signed and confirmed by the principal investigator, statistician, data manager and sponsor, and the reasons for unlocking should be recorded in detail. Or in the process of statistical analysis, it shall be revised in the form of NTF, etc., and filed after written signature.

**11.8 Data Management Report**

After the database is locked, the data management personnel will write a data management report (DMR), which will comprehensively and in detail state the contents related to the data management implementation process, operating procedure and management quality. The final version of the data management report should be signed by the data management personnel, the sponsor and other relevant personnel.

1. **Statistical Analysis**

**12.1 Study Hypothesis and Multiplicity Considerations**

This study uses a single-group target value design to assess whether the IRC-assessed ORR (π) of LP-168 monotherapy in subjects with relapsed or refractory mantle cell lymphoma (R/R MCL) is superior to the set target value (π0). The statistical hypotheses are as follows:

Null hypothesis H0: π ≤ π0

Alternative hypothesis H1: π > π0

These hypotheses will be tested using either an exact test of the single-group target value (significance level α = 0.025 one-sided) or a confidence interval approach. If p < 0.025 for the exact test of the single-group target value, or the lower limit of the 95% two-sided confidence interval of the ORR in this study is > target value (π0), H0 will be rejected and the IRC-assessed ORR (π) of LP-168 monotherapy in R/R MCL subjects will be considered superior to the set target value (π0). There are no multiplicity issues with this test.

**12.2 Sample Size Estimation**

The sample size will be estimated based on the single-group target value test of ORR.

The target value is obtained based on previous treatment efficacy or clinical experience data of the indicated population. A retrospective study with 31 patients showed an ORR of 32% (16%-48%) for salvage chemotherapy in R/R MCL patients received at least 2 prior lines of therapy (including BTK inhibitors), and an observational study with 58 patients showed an ORR of 29% (17%-41%) for lenalidomide-based therapy in R/R MCL patients received at least 4 prior lines of therapy (including BTK inhibitors), and an ORR of 30% (21%-40%) for both studies combined.

Table 2 ORR data for R/R MCL patients previously treated with BTK inhibitors

| Therapeutic regimen | Sample size | ORR with 95% CI |
| --- | --- | --- |
| Salvage chemotherapy | 31 | 32% (16%-48%) |
| Lenalidomide-based therapy | 58 | 29% (17%-41%) |
| Total | 89 | 30% (21%-40%) |

In summary, 30% is selected as the ORR target value. Assuming that the study drug can improve ORR to 50% and the type I error is controlled within 2.5% (one-sided test), 55 subjects can provide a power of not less than 85% to demonstrate that the ORR of LP-168 is superior to 30% of the target value. Considering a dropout rate of approximately 10%, 62 subjects are planned to be enrolled.

**12.3 Analysis Populations**

The analysis population includes the safety analysis set, full analysis set, per protocol set and pharmacokinetic analysis set. The safety analysis set is used for safety analysis, the full analysis set is used for baseline characteristics analysis and efficacy estimation objective analysis, the per protocol set is used for supplementary efficacy analysis, and the pharmacokinetic analysis set is used for analysis and evaluation of pharmacokinetic parameters.

Safety analysis set (SS): All subjects who received at least one dose of the study drug.

Full analysis set (FAS): It is consistent with the population definition in the estimated objectives. Based on the intent-to-treat (ITT) principle, all subjects with R/R MCL who have received at least one dose of the study drug will be included in the FAS.

Per-protocol set (PPS): It includes the subjects in the full analysis set who have good compliance, all the primary efficacy parameters are available, and have no major protocol deviations.

Pharmacokinetic analysis set (PKS): All subjects who received at least one dose of the study drug, had pharmacokinetic data (biological samples were collected) and had no protocol violations that significantly affected the PK results.

**12.4 Statistical Analysis Method**

**Subject distribution:**

The screening, enrollment, dropout and trial completion of all subjects shall be summarized, and the number of subjects enrolled in each analysis set and the reasons for exclusion of all subjects shall be summarized.

**Baseline characteristics of subjects**:

The baseline data of subjects, including demographic data, medical history and treatment history, clinical stage and ECOG PS, will be tabulated and analyzed descriptively. Descriptive summary of measurement indicators shall include number of subjects, mean, standard deviation, median, quartile, minimum and maximum, and frequency and frequency distribution shall be provided for enumeration indicators.

**Compliance and concomitant therapy:**

The study medication compliance of all subjects will be calculated, and the drug exposure such as medication time and dose in each group will be statistically described. The subjects with poor compliance, the specific reasons for poor compliance and their entry into the analysis data set will be described in a list. Note: Medication compliance = Actual dose taken by the subject/Dose should be taken by the subject. If the subject's overall compliance is < 80% or > 120%, the subject is considered to have poor compliance, and if the subject's compliance is < 70%, the subject shall be withdrawn from the PPS analysis. Subject compliance with treatment and the protocol included voluntary compliance with all aspects of the protocol, including collection of all laboratory tests required to comply with safety assessments.

For the analysis of concomitant treatment, the details of concomitant treatment should be listed, such as subject number, site, group, name of concomitant drug, reason for use, route of administration, dose and frequency of administration, start time, end time, etc.

**Safety analysis**:

1. **Adverse events and toxicity**

All adverse events occurring during the study should be described and recorded in the eCRF and graded according to NCI CTCAE 5.0. The number and incidence of all adverse events and serious adverse events, all treatment-emergent adverse events and serious adverse events, adverse events and serious adverse event related (e.g., possibly related, probably related, or definitely related) to the study drug, grade ≥ 3 adverse events (including treatment-emergent adverse events and the study drug-related adverse events), adverse events and serious adverse events leading to dose modification or discontinuation and death will be summarized by system organ class (SOC) and preferred term (PT) according to MEDRA coding results, and the number of subjects, number of AEs and percentage in each dose group will be listed. The details of all adverse events shall be listed.

1. **Vital signs, physical examination, and electrocardiogram**

Descriptive statistics of baseline and post-baseline values of vital signs including systolic blood pressure, diastolic blood pressure, body temperature, pulse and respiration as well as changes from baseline to all visits will be calculated, including mean, standard deviation, median, maximum and minimum. All abnormal vital signs results shall be listed.

Clinical assessment results of physical examination and ECG from baseline to study period and changes from baseline shall be summarized descriptively, and the number of subjects and percentage shall be recorded. A listing of subjects with at least one abnormal and clinically significant clinical assessment of ECG and physical examination shall be provided.

1. **Laboratory tests**

Laboratory test results and changes from baseline at each scheduled visit will be summarized descriptively and, if necessary, graphically visualized for laboratory indicators of special interest to the study.

Cross tabulation shall be provided for changes from baseline to worst on-treatment assessment based on clinical significance (i.e., normal, abnormal not clinically significant, abnormal clinically significant). A listing of abnormal changes and CTCAE grade ≥ 3 laboratory indicators shall be presented.

1. **ECOG performance status score**

The ECOG performance status score and its change from baseline will be statistically described by visit, and the number of subjects and percentage will be recorded, respectively.

**12.5 Quality of Life**

The scores for each item of the EORTC QLQ-C30 at each time point and their changes from baseline will be summarized. Descriptive statistics will include the number of non-missing cases, mean, standard deviation, median, and range.

**12.6 Efficacy Evaluation**

The overall response rate (ORR) assessed by IRC will be calculated based on the target population: The best response is the percentage of the number of subjects of (CR+PR) accounted for the target population, and the 95% confidence interval of ORR will be calculated using Clopper-Pearson exact method. If the lower limit of the confidence interval is > 30%, the ORR of this study can be considered to be superior to the target value.

Complete response rate (CR rate) and investigator-assessed ORR/CR rate shall be calculated similarly as supportive analyses for the estimated objectives.

For time to response (TTR), duration of response (DOR), progression-free survival (PFS), and overall survival (OS), the median survival times, Q1 and Q3, and their 95% confidence intervals will be estimated using the Kaplan-Meier method. Additionally, the 1-year and 2-year progression-free rates, survival rates, and their corresponding 95% confidence intervals will be estimated.

TTR, DOR, PFS and OS are defined as follows:

Time to response (TTR): It is defined as the time from the first dose of the study drug to the first occurrence of response (as defined by ORR).

Duration of response (DOR): It is defined as the time from the first documentation of CR or PR to the date of PD or death from any cause.

Progression-free survival (PFS): It is defined as the time from the first dose of the study drug to disease progression or death (whichever occurs first). It will be censored at the last evaluation time point if the disease progression or death is absent at the time of evaluation.

Overall survival (OS): It is defined as the time from the first dose of the study drug to all-cause mortality. It will be censored as per the last evaluation time point (survival during study) or final confirmed survival date (follow-up after the completion of the study) for the subjects surviving at an evaluation time point.

As a supplementary analysis, the above efficacy analyses will also be performed on the PPS population.

**12.7 Subgroup Analyses**

Necessary subgroup analyses will be performed based on important baseline characteristics and will not be used as a basis for efficacy confirmation. Specific subgroup factors are identified by the statistical analysis plan document.

**1****2.8 Exploratory Analyses**

To evaluate the correlation of potential biomarkers (e.g., BTK mutation, PLC mutation, TP53 mutation, etc.) in lymphoma tissue/circulating lymphoma cells with efficacy of LP-168 monotherapy based on the subject's NGS results.

To evaluate intrinsic or extrinsic factors, such as age, liver function, renal function, ethnicity, etc., that may affect the exposure to the study drug will be assessed by population pharmacokinetic model.

**1****2.9 Interim Analysis and Statistical Analysis Plan**

There was no planned interim analysis for this study.

**12.10 Primary Analysis Time**

Six months after the last subject received the first dose is planned as the primary analysis time point for this study.

Unless otherwise specified, all analyses will be performed using SAS statistical software (version 9.4 or above). After the protocol and CRF are finalized, a statistical analysis plan (SAP) will be drafted separately, and the specific contents and methods of statistical analysis will be subject to the SAP. The SAP shall be finalized no later than database locked.

1. **Pharmacokinetic and Pharmacodynamic Evaluations**

**13.1 Evaluation of Bioanalytical Methodology**

Specificity; matrix effect; standard curve, linear range, lower limit of quantitation; intra- and inter-batch variation; residue; dilution reliability; placement stability test of standard and internal standard; stability test of mother liquor; whole blood placement stability test; freeze-thaw stability test; re-injection stability test; post-preparation stability test; recovery test; batch size, etc.

**13.2 Drug Concentration Analysis**

The drug concentration-time curve of each subject and the mean drug concentration-time curve of each dose group are plotted according to the drug concentration of the subjects. The following statistical calculations are performed at each sampling point: sample size, mean, standard deviation, coefficient of variation, median, minimum and maximum. For the calculation of descriptive statistics, the drug concentrations before Cmax are set to 0 if they are below the lower limit of quantification (LLOQ), and the drug concentrations below LLOQ after Cmax are defined as missing. The means, standard deviations, and coefficients of variation are calculated only if at least two-thirds of the individual data meet or exceed the LLOQ at a given sampling time point.

The linear and semi-logarithmic drug concentration-time curves of individual subjects will be plotted. The mean concentration-time curves of dose groups will be superposed in a single figure, and the curves will be plotted by the arithmetic means of drug concentrations against time in the figure, which is similar to the individual concentration-time curves.

**13.3 Pharmacokinetic Evaluation Indicators**

The main pharmacokinetic parameters include: Tmax, Cmax, AUC0-t, AUC0-∞, λz, t1/2, Vd/F, CL/F, etc.

- Tmax: Time to peak
- Cmax: Time to peak concentration
- AUC0-t: Area under the plasma concentration-time curve from 0 h to the last blood sampling time, calculate using the trapezoidal area method
- AUC0-∞: Area under the plasma concentration curve from 0 to infinity
- λz: Terminal elimination rate constant, obtained by semi-log linear regression of the concentration points in the elimination phase
- t1/2: Apparent terminal elimination half-life, calculate according to the following formula: t1/2 = Ln(2)/λz
- Vd/F: Apparent volume of distribution, Vd/F = CL/F/λz
- CL/F: Apparent total body clearance, CL/F = administered dose/AUC0-∞

**13.4 Pharmacokinetic Parameter Analysis**

The drug concentration data obtained from intensive PK blood sampling will be estimated and analyzed using WinNolin (version 6.4 or above) software for non-compartmental pharmacokinetic parameters, and the main pharmacokinetic parameters will be calculated to comprehensively reflect the characteristics of absorption, distribution, metabolism and excretion of the drug in human body. Descriptive statistical analysis is performed on the pharmacokinetic parameters of different dose groups, and the mean and standard deviation of the pharmacokinetic parameters of each dose group are calculated, as well as the coefficient of variation (CV). For the calculation of PK parameters, the actual sampling time is used for the concentration points that exceed the collection time deviation allowed by the protocol.

During pharmacokinetic analysis, the concentration of a sample whose concentration is measured below the lower limit of quantitation (LLOQ) shall be regarded as zero if collected before reaching Cmax, and non-detectable (ND) if collected after reaching Cmax.

**13.4 Population Pharmacokinetic Analysis**

Write a detailed population pharmacokinetic analysis plan, describe the criteria and procedures for model development and evaluation, handling of various types of missing values, handling of data below the lower limit of quantification, and identification and handling of outliers. Describe the fitting algorithm (such as FOCE), model assumptions (such as parameter distribution), criteria for model construction, software used and its version, etc. Describe the basic model (in the form of diagram and formula), covariate model, methods and criteria for covariate analysis (such as Objective Function Value (OFV), clinical relevance, etc.), inter-individual variation, residual error and time-related random effect model, graphical or statistical model evaluation methods, and sensitivity analysis, etc. If the presentation form of parameters is different from that in the model control file, it is necessary to provide the parameter conversion formula. The reasons for the selection of model evaluation methods should be provided. Describe the key simulation protocol in detail, including the generation method of virtual population, etc. Deviations from standard procedures in the analysis should be explained. If necessary, sufficient information and documentation should be provided to reproduce the existing analysis and to conduct further analysis.

Write the population pharmacokinetic study report, which includes the basic model, key steps and evaluation in the process of covariate analysis, model structure of the final model, fixed effect and random effect parameter estimates and parameter precision (RSE%, 95% CI), model evaluation results, model application (including the effect of covariates on parameters, simulation of dose modifictaion), etc., and focus on the study objectives and model application.

1. **Safety Assessments**

All patients who receive at least one dose of the study drug will be included for safety analysis. The contents of safety evaluation include:

- Complaints of patients and their families and all directly observed adverse events;
- Any abnormal changes in physical examination and vital signs, laboratory tests (including ECG), etc.

Adverse events (including symptoms and laboratory tests, etc.) experienced by subjects must be closely monitored and graded according to National Cancer Institute-Common Toxicity Criteria for Adverse Events, Version 5.0 (NCI CTCAE, Version 5.0). The severity of adverse events and the relationship between adverse events and the study drug should be evaluated.

The investigator is responsible for assessing the relationship of all adverse events to the study drug. The principal investigator can authorize the judgment of other qualified clinicians participating in this study, but remains responsible for this.

**14.1 Definition of Adverse Events**

An adverse event is any undesirable medical event that occurs after the administration of an the study drug to a subject, whether or not considered related to the study drug. Undesirable medical events can be abnormal symptoms (e.g. nausea and chest pain), abnormal signs (e.g. tachycardia and enlarged liver) or abnormal test results (e.g. laboratory tests and ECG) or diseases.

Adverse events occurring in the human body (whether or not related to drugs) include:

- Adverse events occurring during the use of the drug by professionals;
- Adverse events due to (intentional or unintentional) overdose;
- Adverse events due to drug abuse;
- Adverse events due to drug withdrawal;

Adverse events that may be caused purely by the subject’s participation in the study (e.g., adverse events or serious adverse events due to withdrawal of antihypertensive drugs during the washout period), even when they are unrelated to the study drug, must be reported as adverse events.

Absence of or failure to achieve the expected clinical pharmacological action with documentation in the corresponding section of the eCRF is not considered as an adverse event. Any event clearly attributable to disease progression will not be reported as an adverse event.

In this study, any event that is clearly due to disease progression will not be reported as an adverse event.

Disease progression is defined as worsening of a subject's condition due to the disease being treated with the study drug. It may be manifested as a worsening of the disease, worsening of symptoms/signs/laboratory abnormalities due to the disease, appearance of new lesions, or progression of the primary lesion. If it is not possible to determine whether an AE is solely due to disease progression, it should be reported as an AE.

**14.2 Unexpected Adverse Reactions**

An unexpected adverse reaction is an adverse reaction that is different in nature and severity from the expected risk as described in the current information on the study drug (e.g., the Investigator's Brochure or the package insert of the marketed product). The supplementation of important information about the characteristics or severity of known and recorded adverse reactions is also a part of unexpected adverse reaction reports. For example, reactions that are more particular or serious than those described in the Investigator's Brochure should be considered as “unexpected”. Specifically: Acute renal failure is listed as an adverse reaction in the IB, but interstitial nephritis occurs during the trial; hepatitis is listed as an adverse reaction in the IB, but acute severe hepatitis occurs during the trial; both the above conditions should be judged as an unexpected adverse reaction.

**14.3 Observation, Recording and Reporting of Adverse Events**

All adverse events occurring after a subject’s receipt of the study drug must be fully recorded in the subject's electronic Case Report Form (eCRF).

Records must be based on original files. Each event should be described in detail, including the start and end dates, severity, relationship with the study drug, measures taken and the outcome.

**14.4 Methods for Discovering Adverse Events**

Adverse events may be discovered by the following methods at each follow-up visit:

- Information initiatively provided by patients or their caregivers;
- At each follow-up visit, the patient is asked an open, non-induced question: How are you feeling? Have you had any (other) medical problem since the last follow up?
- Abnormalities observed by investigators, other medical workers and families.

**14.5 Time of Collection of Adverse Events**

The AEs should be recorded from the time the subject receives the first dose of the study drug in this study. All existing AEs or SAEs or all new AEs or SAEs occurring within 28 days after last administration should be tracked until they are addressed and the patients’ conditions are stable/return to baseline, unless the investigators believe that they are unlikely to be alleviated due to the diseases of patients. After 28 days, the investigators only collect the AEs and SAEs considered to be relevant to the drug.

For subjects who start other anti-cancer therapy, AEs considered by the investigators to be unrelated to the study drug are no longer recorded.

**14.6 Collection of Data of Adverse Events**

All adverse events should be recorded in the eCRF. Description of an adverse event should address the starting and ending time, whether it complies with the definition of serious adverse events, measures taken (e.g. change of study treatment, other treatments and subsequent examinations) and outcome, and also the investigator's judgment of causality (relationship with the study treatment). Adverse events should be graded according to NCI CTCAE, and changes should be recorded in the corresponding eCRFs.

**14.7 Criteria for Judging the Severity of Adverse Events**

The severity of adverse events should be judged as per the NCI CTCAE 5.0 grading criteria.

**14.8 Correlation Evaluation of the Adverse Event and the Drug**

**Evaluation criteria for adverse events** (including symptoms, signs and test indicators)

- Whether the occurrence time of the adverse event is in line with the medication time.
- Whether the adverse event is a known adverse reaction of the drug.
- Whether the adverse event can be explained by other causes.
- Whether the adverse event disappears after drug withdrawal.
- Whether the adverse event appears again after drug administration.

**14.9 Judgment of Adverse Reactions**

The investigator should evaluate the possible relationships between the adverse event and the study drug and make judgments with reference to the 5-grade classification criteria in the table below.

| **5-grade classification** | **Judgment criteria** |
| --- | --- |
| Definitely related | The reaction corresponds to the known reaction type of the suspected drug and the reasonable temporal sequence after administration of the drug. The adverse reaction is alleviated or disappears after dose reduction or drug withdrawal, and the reaction reoccurs after drug administration. |
| Probably related | The reaction corresponds to the known reaction type of the suspected drug and follows a reasonable temporal sequence after administration of the drug. The adverse reaction is alleviated or disappears after dose reduction or drug withdrawal. However, the reaction can also be caused by the subject’s clinical state or other reasons. |
| Possibly related | The reaction corresponds to the known reaction type of the suspected drug and follows a reasonable temporal sequence after administration of the drug. The adverse reaction is alleviated or not apparent after dose reduction or drug withdrawal. However, the reaction can be explained by the subject’s clinical state or other reasons. |
| Unlikely related | The reaction does not fully correspond to the known reaction type of the suspected drug and does not fully follow a reasonable temporal sequence after administration of the drug. The reaction can also be caused by the subject’s clinical state or other reasons. |
| Not related | The reaction does not correspond to the known reaction type of the suspected drug, and does not follow a reasonable temporal sequence after administration of the drug. The reaction may be explained by the subject’s clinical state or other reasons, and is alleviated or disappears after the clinical symptoms or other reasons are ruled out. |

There is at least one reasonable possibility of a causal relationship between the study drug and the adverse event. That is to say, an association cannot be ruled out, it should be deemed as an adverse reaction caused by the drug, and whether it is a serious reaction should be determined based on severity.

In this study, adverse reactions are defined as those judged as possibly related, probably related or definitely related to the study drug according to the 5-grade classification. It should be noted that, according to the 5-grade classification, all adverse events initially judged as “unlikely related” may be further judged, and the basis for judgment and correction should be provided; Adverse events that remain “unlikely related” after further judgment will not be included in drug-induced adverse reactions.

**14.10 Treatment, Follow-up and Duration of Adverse Events**

After the initial report of an adverse event by the investigator, close follow-up of the subject is required to provide further information. All adverse events during the study, even if the subject has completed the study or ended the treatment, should be followed up until resolution, stabilization, recovery to baseline level, or death, loss to follow-up or withdrawal of informed consent, unless the adverse event is unlikely to be relieved due to the subject's own condition according to the investigator's judgment.

**14.11 Judgment and Handling of Laboratory Indicator Abnormalities**

Investigators should first compare abnormal laboratory test values to the baseline and previous test results, and determine whether they are clinically significant. Abnormal laboratory test values that are clinically significant and aggravated from the baseline should be reported as adverse events and followed up until recovery to normal or the baseline values. Abnormal laboratory test values that are not clinically significant or that are clinically significant but not different from the baseline will not be reported as adverse events. All abnormal laboratory values should be accurately recorded on the relevant eCRF.

**14.12 Potential Adverse Events and Control**

The vital signs and blood test results of the patients should be monitored closely according to the protocol to adequately protect their interests throughout the clinical trial. Various tests may be added at any time if the investigators think them necessary. The appropriate handling principles below are developed for the possible risks:

1. **Hematologic adverse events such as neutropenia, thrombocytopenia, and anemia, and bleeding**

TRAEs such as neutrophil count decreased (20.8%), subcutaneous hemorrhagic spots (12.5%), platelet count decreased (12.5%) and anemia (12.5%) were observed in the Phase I clinical trial of LP-168.

Safety results of similar drugs have shown that hemorrhage is a common hematologic toxicity of BTK inhibitors. In terms of the incidence rate of hemorrhage (of any grade), the rates are as follows: Ibrutinib (39%-50%)[14], Zanubrutinib (50%)[50], and Acalabrutinib (31%)[51]. Other common hematologic toxicities of Ibrutinib, Acalabrutinib, and Zanubrutinib include neutropenia (23-27%), infections (19-24%), thrombocytopenia (7-10%), and anemia (3-8%). The specific safety concern of the next generation BTK inhibitor GDC-0853 is thrombocytopenia, with an incidence rate of 16.7% for grades 1-2 and 8.3% for grades 3-4. Grade 3 or above adverse events of Vecabrutinib with high incidence are hematologic toxicities such as anemia (~35%), neutropenia (~20%), thrombocytopenia (~15%), etc.

In summary, neutropenia, infection, thrombocytopenia, anemia and hemorrhage are common hematological adverse reactions of BTK inhibitors, so the risk control should be focused on the following aspects in clinical studies:

Monitoring frequency of neutrophils, white blood cell, platelet, hemoglobin and other blood routine variables:

- Monitoring once during screening period
- Monitoring once on Day 8, Day 15 and Day 28 of Cycle 1
- Monitoring once every cycle in Cycle 2 and after Cycle 2
- Monitoring once at end-of-treatment visit
- Monitoring once at safety visit on Day 28 after the end of treatment
- During the trial, the frequency of blood routine monitoring may be increased as clinically indicated.

If Grade 4 hematologic toxicity, Grade 3 febrile neutropenia, or Grade 3 thrombocytopenia with bleeding (excluding toxicities that, in the judgment of the investigator, do not affect the subject’s safety) occurs and is considered possibly related, probably related, or related to the study drug, the subject should interrupt the study drug until the toxicity has resolved to ≤ Grade 1 or baseline levels (symptomatic and supportive treatment is allowed for achieving this criterion. For AEs considered to be caused by both the underlying disease and the study drug, the decision on whether to interrupt the study drug and when to resume the study drug may be made after discussion between the investigator and the sponsor’s medical monitor) (For hypocytosis meeting the Grade 3 criteria at screening, if the Grade 4 hematologic toxicity criteria are met after treatment, the study drug may be continued after the investigator assesses the risk/benefit ratio of the subject and the the sponsor approval is obtained.) The study drug must be permanently discontinued for subjects who do not recover to Grade ≤ 1 or baseline within 28 days (unless the investigator believes that the subject can benefit from continued use of the study drug and the medical approval is obtained from the sponsor). If the above toxicities occur for the first time, the investigator can determine whether the dose of the study drug needs to be modified according to the specific conditions of the subject when the study drug is resumed. However, if the above toxicities occur again after the use of the same dose of the study drug, the dose should be reduced to 125 mg QD. If the same grade of toxicity recurs after a dose reduction, the dose should be reduced to 100 mg QD. If the subject is administrated with 125 mg QD or 100 mg QD for more than 1 cycle and the grade of toxicities does not worsen or further improves, the investigator can decide whether to escalate the dose according to the individual conditions of the subject (but only one dose escalation is allowed for each subject). If the same grade of toxicity recurs after a dose reductiontoxicity, the study drug must be permanently discontinued (in exceptional cases, treatment may be continued only after discussion between the investigator and the sponsor’s medical monitor). Patients should be fully informed to report any symptoms of fever (suggesting possible infection) and hemorrhage to the investigators in a timely manner during the study. At the same time, appropriate anti-infective therapy or blood product transfusion and other supportive treatment may be given according to the investigator's judgment as clinically indicated.

1. **Infection**

Upper respiratory tract infection (16.7%) and one CTCAE Grade 3 lung infection were observed in the Phase I clinical trial of LP-168.

The clinical results of similar drugs showed that most infections occurred during treatment with Ibrutinib, Acalabrutinib and Zanubrutinib were Grade 1-2, but the incidence of CTCAE Grade 3 or higher infections was up to 20%-25%. This shows that various serious infections are common non-hematological adverse reactions of BTK inhibitors. Therefore, risk control should be focused on the following aspects in clinical studies:

Monitor the infection signs and symptoms of patients and give treatment according to the medical conditions.

Make every effort to implement infection prevention measures for the subjects, such as conducting thorough environmental disinfection and cleaning, maintaining the hygiene of the subjects' surroundings as much as possible, and avoiding close contact between the subjects and other patients or family members with infectious symptoms; educate the subjects to avoid crowded, enclosed places as much as possible; proactively protect susceptible areas from infection, such as daily cleaning of the anus, paying attention to oral hygiene, and using sodium bicarbonate mouthwash or other mouth rinses; instruct the subjects' family members to ensure the hygiene of the subjects' diet; drink plenty of water and maintain adequate urine output, etc.

Monitor subjects closely for signs and symptoms of infection (e.g., body temperature).

Monitor vital signs, hematology, etc., and if necessary, lung CT, relevant sample culture/drug sensitivity test during clinical trials. Actively give anti-infection treatment if there are signs of infection. Interrupt the study drug if necessary.

Leukopenia/neutropenia is one of the important factors leading to infection, and G-CSF and other treatments should be given when needed in the study.

1. **Gastrointestinal adverse events such as diarrhoea and vomiting**

Only decreased appetite (4.2%) was observed in the Phase I clinical trial of LP-168, but given the susceptibility of MCL to intestinal metastasis.

The safety results of clinical trials of similar drugs showed that diarrhea was the most common adverse event during treatment with Ibrutinib. In the pivotal Phase 2 clinical study of Ibrutinib in MCL (Study 1104), the most common gastrointestinal adverse reactions of Ibrutinib were diarrhea (51%), nausea (31%), constipation (25%), and vomiting (23%). In a clinical study of Ibrutinib in CLL/SLL (Study 1102), the most common gastrointestinal adverse reactions of Ibrutinib were diarrhea (59%), constipation (22%), nausea (20%), and vomiting (18%). However, second-generation BTK inhibitors such as Acalabrutinib and Zanubrutinib have a lower incidence of gastrointestinal adverse reactions than first-generation agents.

This shows that gastrointestinal adverse reactions may be the common non-hematological adverse reactions of oral BTK inhibitors. Therefore, risk control should be focused on the following aspects in clinical studies:

First, exclude any condition affecting the patient's swallowing of the drug and the condition seriously affecting the absorption or pharmacokinetic parameters of the study drug, including uncontrollable nausea and vomiting, history of gastrointestinal resection, etc., during the screening and enrollment of subjects.

The subjects should be fully informed of the adverse reactions that may be caused by the therapeutic regimen before enrollment and administration to reduce the anxiety of the subjects and increase the compliance. Advise the subjects to eat a small amount of light diet slowly.

Strengthen the monitoring in clinical practice. Once the gastrointestinal adverse reactions occur in the clinical study:

Grade 1-2: No special supportive therapy is generally required. Encourage the patients to drink more water or liquid supplements, or take corresponding relieving drugs under the guidance of the doctor, such as antidiarrheals or antiemetics, but be careful not to take drugs known to cause QTc interval prolongation or torsade de pointes (see Appendix 4). Diarrhea can be effectively controlled by taking antidiarrheals such as loperamide (Imodium).

Grade ≥ 3 or requiring hospitalization: Supportive therapy must be instituted immediately, and the study drug must be permanently discontinued for those who do not recover to Grade ≤1 within 28 days (unless the investigator believes that the subject can benefit from continued use of the study drug and the medical approval is obtained from the Sponsor). If the above toxicities occur for the first time, the investigator can determine whether the dose of the study drug needs to be modified according to the specific conditions of the subject when the study drug is resumed. However, if the above toxicities occur again after the use of the same dose of the study drug, the dose should be reduced to 125 mg QD. If the same grade of toxicity recurs after a dose reduction, the dose should be reduced to 100 mg QD. If the subject is administrated with 125 mg QD or 100 mg QD for more than 1 cycle and the grade of toxicities does not worsen or further improves, the investigator can decide whether to escalate the dose according to the individual conditions of the subject (but only one dose escalation is allowed for each subject). If the same grade of toxicity recurs after a dose reductiontoxicity, the study drug must be permanently discontinued (in exceptional cases, treatment may be continued only after discussion between the investigator and the sponsor’s medical monitor).

1. **Hepatotoxic adverse events**

Transaminases increased (12.5%) was observed in the Phase I clinical trial of LP-168.

The safety results of clinical trials of similar drugs show that hepatotoxicity is relatively rare among BTK inhibitors of the same class. In clinical studies (Study PCYC-1104, Study SPARK and Study RAY) of Ibrutinib monotherapy in patients with MCL, no hepatotoxicity was reported; No hepatotoxicity was reported based on long-term follow-up results of clinical studies (Study PCYC-1102/03 and Study RESONATE) of Ibrutinib monotherapy in patients with CLL/SLL. Hepatitis B virus (HBV) reactivation is reported occasionally in clinical studies related to Ibrutinib, but the mechanism is unclear. A Phase 3 study of Acalabrutinib monotherapy in patients with relapsed or refractory CLL (ASCEND study) reported a low incidence of Grade 1-2 and Grade 3 ALT increased and AST increased, both at 1%.

In summary, the potential for BTK inhibitors to cause hepatotoxicity is expected to be low, but in view of the results of preclinical toxicity studies of LP-168, monitoring of serum chemistry parameters such as ALT, AST and bilirubin will be strengthened in this clinical study.

- The monitoring is conducted once during the screening period to exclude patients with serious or unmanageable systemic liver disease, i.e., AST and ALT > 3.0 × ULN; serum total bilirubin > 1.5 × ULN, or total bilirubin > 3 × ULN if there is definite Gilbert syndrome (unconjugated hyperbilirubinemia); AST and ALT > 5 × ULN, and serum total bilirubin > 3.0 × ULN if liver dysfunction is considered to be caused by liver involvement by lymphoma;
- Monitoring once during screening period
- Monitoring once on Day 8, Day 15 and Day 28 of Cycle 1
- Monitoring once every cycle in Cycle 2 and after Cycle 2
- Monitoring once at end-of-treatment visit
- Monitoring once at safety visit on Day 28 after the end of treatment
- During the trial, the frequency of blood biochemistry monitoring may be increased as clinically indicated.

No dose modification is required in case of Grade 1-2 hepatotoxicity; Grade ≥ 3 or requiring hospitalization: Supportive therapy must be instituted immediately, and the study drug must be permanently discontinued for those who do not recover to Grade ≤ 1 within 28 days (unless the investigator believes that the subject can benefit from continued use of the study drug and the medical approval is obtained from the Sponsor). If the above toxicities occur for the first time, the investigator can determine whether the dose of the study drug needs to be modified according to the specific conditions of the subject when the study drug is resumed. However, if the above toxicities occur again after the use of the same dose of the study drug, the dose should be reduced to 125 mg QD. If the same grade of toxicity recurs after a dose reduction, the dose should be reduced to 100 mg QD. If the subject is administrated with 125 mg QD or 100 mg QD for more than 1 cycle and the grade of toxicities does not worsen or further improves, the investigator can decide whether to escalate the dose according to the individual conditions of the subject (but only one dose escalation is allowed for each subject). If the same grade of toxicity recurs after a dose reductiontoxicity, the study drug must be permanently discontinued (in exceptional cases, treatment may be continued only after discussion between the investigator and the sponsor’s medical monitor).

**14.1****3 Adverse Events of Special Interest (AESIs)**

- Grade ≥3 hematologic toxicity
- Infection
- Abnormal liver function
- Blood bilirubin increased
- Gastrointestinal toxicity
- Hemorrhage
- Arrhythmia (including atrial flutter, atrial fibrillation, etc.)
- Hypertension

**14.14 Serious Adverse Events**

**Serious adverse event (SAE):** An adverse event occurring at any dose of the study drug during any period after the subject receives the study drug (i.e., treatment period, follow-up period) and meeting one or more of the following criteria:

- Result in death
- life-threatening
- Require hospitalization or prolongation of hospitalization
- Result in persistent or significant disability or incapacity
- Result in congenital anomaly or birth defect
- Important medical events that may result in injury to the subject or require medical treatment to prevent the conditions listed above

When it is not clear whether it is a serious adverse event, it is recommended that the investigator discuss with the Sponsor.

Any event clearly attributable to disease progression and meeting severity criteria will not be reported as a SAE.

**Life-threatening:** The term “life-threatening” is defined as “serious”, meaning that the subject was at risk of death at the time of the adverse event. It does not refer to an adverse event that hypothetically might have caused death if it were more severe.

**Hospitalization:** Any adverse event that results in patient hospitalization or prolongation of patient hospitalization is considered serious **unless** one of the following exceptions is met:

- Staying in the hospital for not more than 12 hours;
- Hospitalization is pre-scheduled (operation or selective operation having been planned before initiation of the study);
- Hospitalization is unrelated to the adverse event (e.g., hospitalization for nursing purposes, hospitalization for self-convenience reasons).
- Hospitalization due to social factors (hospitalizations that is not necessary but is due to social factors, such as health insurance, special regulations of a hospital, etc.).

**Disability:** It means that someone’s ability to engage in daily life is severely impaired.

**Important medical events:** Although some medical events do not meet the criteria for serious adverse events, that is, although they are not immediately life-threatening and do not result in patient death or hospitalization, they may harm the subject or require medical intervention to prevent the occurrence of the above situations. These circumstances that may lead to serious clinical consequences as judged by the investigator are called important medical events. The determination of important medical events is based on the medical knowledge and clinical experience of the investigators. The expedited reporting procedure for serious adverse events must also be adopted for important medical events. In addition, a suspected transmission of pathogens via the study drug is also considered an important medical event.

**Hy's law:**

According to the *Guidelines for Identification, Management, and Evaluation of Drug-Induced Liver Injury in Clinical Trials*, all cases in clinical trials that are suspected to be consistent with Hy's Law should be reported expeditiously in accordance with the reporting procedure of the ICH E2A guideline. The report should include all available information, especially the information necessary to assess the severity of the event and the causal relationship to the drug. Please refer to Appendix 7 for specific descriptions of cases meeting the Hy's law. At the same time, subjects should be closely monitored until complete recovery or relevant clinical outcome events occur, and supplementary information should be collected. Hy's law specifically includes the following three items:

1. The drug causes hepatocellular-type injury, with a higher incidence of ALT or AST increased to 3 × ULN and above compared with non-hepatotoxic comparators or placebo;
2. Among subjects with aminotransferase increased, aminotransferase were typically well above 3 × ULN, and some subjects had concurrent increase in serum TBil to 2 × ULN or above without cholestasis at baseline (serum ALP increased);
3. There is no alternative explanation for the concurrent elevation of aminotransferase and TBil, such as viral hepatitis A, B, C, E, or other acute liver disease, or concomitant use of other drugs that may cause liver injury.

**SAE reporting procedures are as follows:**

Any SAEs that occur during the trial must be reported by the investigator to the Sponsor within 24 hours of discovery or becoming aware of them, and must also be reported to the Ethics Committee and institution in accordance with the requirements of the Ethics Committee and institution at the study site where the study is conducted. At the same time, the investigator must fill in the Serious Adverse Event Report Form (SAE), detailing the time of occurrence, severity, relationship with the study drug and measures taken, and sign the report. If there is any follow-up information, it should be reported in a timely manner. The initial report should, to the extent possible, include the following information: source of the report, basic subject information, name of the study drug, name of the serious adverse event, duration, severity, relationship to the study drug, treatment, and outcome of the event.

The SAE reporting unit and its contact information are shown in the table below.

| Sponsor: Guangzhou Lupeng Pharmaceutical Co., Ltd.  Contact: Department of Pharmacovigilance, Tel.: 0571-81999121, E-mail: lupeng-pv@ecr-global.com |
| --- |

**14.15 Suspected Unexpected Serious Adverse Reactions (SUSARs)**

A suspected unexpected serious adverse reaction (SUSAR) refers to that where the nature and severity of all clinical manifestations observed in the subject exceed what is described in the Investigator's Brochure for the study drug, the package insert of marketed drugs, or other available information on product characteristics. Expedited reporting of SUSARs during a drug clinical trial is performed in the form of Individual Case Safety Reports (ICSRs). If the investigator and the sponsor cannot reach an agreement on the judgment of the causal relationship between the adverse event and the drug, expedited reporting should also be performed if the relationship between the adverse event and the investigational drug cannot be ruled out by either party. Related terms should be encoded using the ICH *M1: MedDRA.*

The following situations are generally not considered for expedited reporting:

- Non-serious adverse events
- Serious adverse events not related to the study drug
- Serious but expected adverse reactions
- Serious adverse events as the primary efficacy endpoints

**SUSAR reporting requirements**

The Sponsor should report SUSARs to regulatory authorities, participating investigators, and other interested parties in accordance with regulatory requirements. For reporting of SUSARs other than death or life-threatening events, the Sponsor should rapidly report to all clinical investigators and institutions participating in the clinical trial, ethics committees, drug regulatory authorities and health authorities within 15 days. After submission of the report, serious adverse reactions should be continuously followed up, and relevant new information or information about changes to the previous report should be timely submitted in the form of follow-up report within 15 days from the date of obtaining new information. For reporting of fatal or life-threatening SUSARs, the Sponsor should rapidly report to all clinical investigators and institutions participating in the clinical trial, ethics committees, drug regulatory authorities and health authorities within 7 days. Follow-up information will be reported and completed within the next 8 days. In addition, the Sponsor should also report other potentially serious safety risk information to the national drug evaluation agency as soon as possible, while making medical and scientific judgment in each case.

**Adverse events of special interest**

**Important adverse events:**

An significant AE is defined as any AE (excluding SAE) that occurs and results in the adoption of targeted medical measures (such as drug withdrawal, dosage reduction and symptomatic treatment) and obvious abnormality in the hematological test or other laboratory tests.

**Pregnancy, abortion, birth defects/congenital abnormalities:**

If a female subject or the partner of a male subject becomes pregnant during enrollment in the study, a Pregnancy Event Report Form should be completed and reported to the Sponsor (via email to the Sponsor's Pharmacovigilance Department: lupeng-pv@ecr-global.com) and the Ethics Committee. The reporting time limit is the same as that of SAE. In addition, the investigators should track pregnancy to the end of pregnancy or termination of pregnancy (natural, accidental or therapeutic abortion), and report the outcome to the sponsor's Pharmacovigilance Department and Ethics Committee by completing the Pregnancy Event Report Form. If the pregnancy outcome meets the criteria that can be immediately classified as SAEs (i.e., spontaneous abortion, stillbirth, neonatal death or congenital abnormality/birth defect), the investigator should report it according to the SAE reporting procedure.

**Overdose:**

In the event of an overdose, an Overdose Report Form should be completed and and it should be reported to the Sponsor within 72 hours (via email to the Sponsor's Pharmacovigilance Department: lupeng-pv@ ecr-global.com).

**Recording and reporting of safety data**

The safety data during drug clinical trials should be recorded in detail and evaluated and reported in accordance with applicable regulations, guidelines and other regulatory documents.

For fatal or life-threatening events, copies of hospital reports should also be faxed, including any relevant diagnostic test results/reports, such as pathology reports, discharge summaries, autopsy reports, post-mortem findings, histopathology results, and other documents.

Guangzhou Lupeng Pharmaceutical Co., Ltd. may require the study personnel to provide other information to ensure the timely and accurate completion of safety report.

Study personnel should take appropriate treatment measures for SAEs to ensure the safety of subjects, and record them. Any drugs required for the treatment of SAEs must be recorded in the concomitant medication column of the patient's eCRF.

Each SAE should be followed until resolution or stabilization, and update reports should be submitted to designated personnel. Any simple Grade 4 laboratory abnormalities (according to CTCAE v5.0) will not be reported as a serious adverse reaction unless the investigator considers that the abnormality meets the criteria for SAE. Laboratory abnormalities of CTCAE Grade 4 should be recorded in the “Laboratory Data” page and periodically checked by clinical research associates.

1. **Study Management**

**15.1 Monitoring**

This study will be monitored in accordance with China Good Clinical Practice (GCP).

**15.2 Data Verification**

In this study, the CRA authorized by Guangzhou Lupeng Pharmaceutical Co., Ltd. is required to have direct access to the raw data for verification, which is realized by checking the data on the patient's case report form and those on the original medical record. This data verification process is an important part to ensure the quality of the study, and transcription errors and omissions can be corrected during this process.

**15.3 Audit and Inspection**

Representatives, regulatory authorities and Independent Ethics Committee of Guangzhou Lupeng Pharmaceutical Co., Ltd. may visit the site for auditing or inspection, including raw data verification.

**15.4 Personnel Training**

The principal investigator will keep a study training record of all study-related personnel (doctors, nurses, and other personnel). The principal investigator should ensure that all these personnel have received appropriate training related to the study and that any information related to the conduct of the study has been transmitted to the relevant personnel.

**15.5 Data Collection and Processing**

The sponsor provides the electronic case report form (eCRF), and the required information must be filled in the required space in the case report form. If the information is not applicable, “NA” should be filled in; If the examination item is not implemented, “ND” should be filled in; If the information cannot be obtained, “UK” should be filled in; No blank space is allowed. The electronic case report form (eCRF) should not include the subject's name, but the subject's initials and subject number. Refer to Instructions for eCRF Completion for specific requirements.

The complete electronic case report form (eCRF) must be signed and dated by the investigator.

The investigator must make a decision on the patient's toxicity grading and tumor response assessment, while the head of clinical study should make the final arbitration on the diagnosis.

During the study, the investigator should allow the CRAs or representatives of the Sponsor to visit the study institution to inspect the study-related documents (e.g., subject informed consent form, study drug inventory, and approval document of the Ethics Committee). During the visit, the CRAs will strictly review the subject's files to check whether the information recorded on the eCRF is consistent with the subject's original records, especially the key information related to safety and efficacy.

**15.6 Sample Testing of Central Laboratory**

The central laboratory of this study is set up in Guangzhou KingMed Diagnostics Center Co. Ltd., and the Central Laboratory Service Agreement is signed by Guangzhou Kingmylab Pharmaceutical Research Co., Ltd., both of which are the holding subsidiaries of Guangzhou Kingmed Diagnostics Group Co., Ltd. The collected biological samples will be tested, preserved and destroyed by Guangzhou KingMed Diagnostics Center Co. Ltd.

The PK laboratory for this study is set in Wuhan Hongren Biopharmaceutical Inc. The collected biological samples will be tested, preserved and destroyed by Wuhan Hongren Biopharmaceutical Inc.

1. **Ethics, Laws and Administrative Management**

**16.1 Ethics Committee**

The study protocol and subject informed consent form must be submitted to the Ethics Committee of the study site for review and approval prior to the start of the study. The Ethics Committee should submit its approval comments to the investigator in written form. The investigator must submit a copy of the documents approved by the Ethics Committee as well as the members and qualifications of the Ethics Committee to the Sponsor.

Any serious adverse reactions and death cases occurred during the study should be reported to the Ethics Committee by the investigators. The Ethics Committee should be informed at the end of the study.

**16.2 Informed Consent Form**

The informed consent form should conform to the requirements of the latest version of the Declaration of Helsinki and comply with the rules and guidelines established by National Medical Products Administration. Prior to screening, subjects should be informed of the nature of the study drug, the study objectives, study procedures, possible benefits and possible risks. The investigator should explain the trial process and possible problems to the subjects, and the subjects should sign and date the informed consent form to indicate their understanding and consent. If the provisions permit the patients to give verbal consent in the presence of circumstantial evidence, the witness should sign and date the consent, and the witness is unrelated to the study. If the patient is mentally and physically incapacitated, he or she should have a legally acceptable representative to read and understand the informed consent form, and then sign and date it. The subject or his/her legally acceptable representative will keep one signed informed consent form, and the other signed informed consent form will be kept in the study records of the clinical investigator.

**16.3 Records Retention**

The investigator should keep all detailed source documents of subjects to ensure that the data in the database are accurate, complete and timely updated. Source documents, medical records, etc. should be clear, detailed and easily identified by the personnel participating in the clinical trial.

Data in the eCRF can only be modified by the investigator or personnel authorized by the investigator.

At the end of the study, eCRFs will be printed/saved on a burned CD for filing. The trial data should be kept for at least 5 years after the end of the trial. However, if it’s required by the existing regulations or agreement with the Sponsor, such data should be kept for a longer period. The Sponsor will notify the investigators in writing when the data need not be kept any longer.

**16.4 Study Protocol Amendment**

In case of any study protocol amendment that may influence the conduct of the study, the potential benefits of the study, the safety of patients, study objectives, study design, number of subjects and study procedures, etc., a copy of revision opinions of the study protocol must be presented to the Ethics Committee. All study protocol amendment proposals must be approved by the Sponsor, the investigators and the Ethics Committee prior to implementation.

**16.5 Qualification Certificate of Clinical Laboratory and Normal Range of Clinical Examination**

Each clinical study site should submit the qualification certificate of clinical laboratory and a copy of normal range of clinical examination as relevant documents to the Sponsor for filing.

**16.6 Signature Page of the Clinical Study Protocol**

Once relevant regulatory authorities and ethics committees agree to conduct this clinical study in accordance with the study protocol submitted by the Sponsor, the clinical investigators, the Sponsor, PK testing unit and data management and statistical analysis company of this study must sign on the signature page of the clinical study protocol.

**16.7 Expected Trial Duration**

Expected trial duration: December 2022 to December 2025. After the study, subjects who remain on treatment may join another long-term follow-up study and receive treatment from the sponsor to ensure that subjects can take LP-168 until disease progression or unacceptable toxicity.

**Appendices**

**Appendix 1: ECOG Performance Status Criteria**

| **ECOG Performance Status Scale** | |
| --- | --- |
| **Grade** | **Description** |
| 0 | Able to carry on normal activity. Fully active, able to carry on all pre-disease performance without restriction |
|
| 1 | Able to walk, with symptoms of disease. Restricted in physically strenuous activity but ambulatory and able to carry out work of a light or sedentary nature, e.g., light house work, office work |
|
| 2 | Confined to bed less than 50% of waking hours. Ambulatory and capable of all selfcare but unable to carry out any work activities. Up and about more than 50% of waking hours |
|
| 3 | Confined to bed more than 50% of waking hours. Capable of only limited selfcare; confined to bed or chair more than 50% of waking hours |
|
| 4 | Confined to bed 100% of waking hours. Completely disabled. Cannot carry on any selfcare. Totally confined to bed or chair. |
|
| 5 | Death |

**Appendix 2: IPI Score and MIPI Assessment Criteria**

**Simplified MCL International Prognostic Index (MIPI) Scoring System**

| Point | Age (years) | ECOG PS (points) | LDH value/normal value | WBC(×109/L) |
| --- | --- | --- | --- | --- |
| 0 | <50 | 0-1 | <0.67 | <6.70 |
| 1 | 50-59 |  | 0.67-0.99 | 6.70-9.99 |
| 2 | 60-69 | 2-4 | 1.00-1.49 | 10.00-14.99 |
| 3 | ≥70 |  | ≥1.50 | ≥15.00 |

Grouping: Low risk group: 0-3 points; Intermediate risk group: 4-5 points; High risk group: 6-11 points.

**IPI Scoring System for Lymphoma Patients**

| Item | 0 point | 1 point |
| --- | --- | --- |
| Age | ≤ 60 years of age | > 60 years of age |
| Ann-Arbor staging | Stagr 1-2 | Stage 3-4 |
| ECOG PS | 0-1 point | ≥ 2 points |
| Extranodal lesions | 0-1 lesion | ≥ 2 lesions |
| LDH | Normal | Above normal |

Note: 0-1 point: low risk; 2 points: low-intermediate risk; 3 points: high-intermediate risk; 4-5 points: high risk.

**Appendix 3: List of CYP3A Inhibitors or Inducers & Sensitive Substrates of OATP1B1/OATP1B3 & Clinically Commonly Used H2 Receptor Blockers and Proton Pump Inhibitors**

Oral administration of potent or moderate CYP3A inhibitors or inducers is contraindicated due to their large effect on plasma concentration of LP-168. Oral administration of sensitive substrates of OATP1B1 and OATP1B3 is contraindicated as LP-168 may have a large effect on the concentration levels of these drugs. Oral proton pump inhibitors are contraindicated as they alter the gastric acid environment and may have a large effect on LP-168 absorption.

| **CYP3A inhibitors** | **CYP3A inducers** |
| --- | --- |
| **Potent:**   - Ceritinib - Idelalisib - Nefazodone - Telithromycin - Cobicistat - Ritonavir - Elvitegravir & Ritonavir - Indinavir & Ritonavir - Itraconazole - Ketoconazole - Lopinavir & Ritonavir - Paritaprevir & Ritonavir & (Ombitasvir &/or Dasabuvir) - Posaconazole - Saquinavir & Ritonavir - Tipranavir & Ritonavir - Voriconazole - Clarithromycin - Nelfinavir   **Moderate:**   - Conivaptan - Aprepitant - Ciprofloxacin - Crizotinib - Cyclosporine - Dronedarone - Erythromycin - Fluconazole - Fluvoxamine - Imatinib - Isavuconazole - Verapamil - Diltiazem - Grapefruit juice   **Mild:**   - Amiodarone - Chlorzoxazone - Cilostazol - Cimetidine - Clotrimazole - Fosaprepitant - Istradefylline - Ivacaftor - Lomitapide - Ranitidine - Ranolazine - Ticagrelor | **Potent:**   - Apalutamide - Rifampicin - Phenytoin - Carbamazepine - Enzalutamide - Ivosidenib - Lumacaftor & Ivacaftor - Mitotane - St. John's Wort   **Moderate:**   - Bosentan - Cenobamate - Dabrafenib - Efavirenz - Etravirine - Lorlatinib - Pexidartinib - Phenobarbital - Primidone - Sotorasib   **Mild:**   - Armodafinil - Elagolix - Mobocertinib - Modafinil - Rufinamide - Vemurafenib - Zanubrutinib |
| **OATP1B1/OATP1B3 sensitive substrate** | |
| - Elagolix - Lovastatin - Bosentan - Fexofenadine - Glibenclamide - Repaglinide - Atorvastatin | - Pitavastatin - Pravastatin - Rosuvastatin - Simvastatin - Paclitaxel - Docetaxel |
| **H2 receptor blocker** | **Proton pump inhibitor** |
| - Cimetidine - Ranitidine - Famotidine - Nizatidine - Roxatidine - Ebrotidine - Lafutidine | - Omeprazole - Esomeprazole - Lansoprazole - Dexlansoprazole - Pantoprazole - Rabeprazole - Ilaprazole - Revaprazan |

**Appendix 4:** **Drugs for Prolonging QT Interval and/or Inducing Torsades de Pointes**

The following table lists drugs with a known risk of torsade de pointes, taken from www.crediblemeds.org (February 21, 2023). Not all drugs are listed in this table. All drug listings and updates are available on this website: www.crediblemeds.org.

| Amiodarone (Cordarone® and others)  Anagrelide (Agryline® and others)  Arsenic trioxide (Trisenox®)  Astemizole (Hismanal®)  Azithromycin (Zithromax® and others)  Bepridil (Vascor®)  Chloroquine (Aralen®)  Chlorpromazine (Thorazine® and others)  Cilostazol (Pletal®)  Ciprofloxacin (Cipro® and others)  Cisapride (Propulsid®)  Citalopram (Celexa® and others)  Clarithromycin (Biaxin® and others)  Cocaine  Disopyramide (Norpace®)  Mesoridazine (Serentil®)  Methadone (Dolophine® and others)  Moxifloxacin (Avelox® and others)  Ondansetron (Zofran® and others)  Oxaliplatin (Eloxatin®)  Papaverine hydrochloride (intracoronary)  Pentamidine (Pentam®)  Pimozide (Orap®)  Probucol (Lorelco®)  Procainamide (Pronestyl® and others)  Propofol (Diprivan® and others)  Quinidine (Quinaglute® and others)  Roxithromycin (Rulide® and others)  Vandetanib (Caprelsa®) | Dofetilide (Tikosyn®)  Domperidone (Motilium® and others)  Donepezil (Aricept®)  Dronedarone (Multaq®)  Droperidol (Inapsine® and others)  Erythromycin (E.E.S.® and others)  Escitalopram (Cipralex® and others)  Flecainide (Tambocor® and others)  Fluconazole (Diflucan® and others)  Gatifloxacin (Tequin®)  Grepafloxacin (Raxar®)  Halofantrine (Halfan®)  Haloperidol (Haldol® (US & UK) and others)  Ibogaine  Ibutilide (Corvert®)  Levofloxacin (Levaquin® and others)  Levomepromazine (Nosinan and others)  Levacetylmethadol (Orlaam®)  Levosulpiride (Lesuride and others)  Lithium (Eskalith and others)  Sevoflurane (Ulane® and others)  Sotalol (Betapace® and others)  Sparfloxacin (Zagam®)  Sulpiride (Dogmatil® and others)  Sultopride (Barnetil and others)  Terfenadine (Seldane®)  Terlipressin (Teripress and others)  Thioridazine (Mellaril® and others) |
| --- | --- |

**Appendix 5: Lugano 2014 Criteria for Assessing Lymphoma (Cheson et al)**

|  | **Lesion area** | **PET/CT response** **assessment** | **CT response** **assessment** |
| --- | --- | --- | --- |
| CR | Lymph nodes and extranodal sites involved | 5PS score of 1, 2, 3* points, with or without residual lesions;  Note: The metabolism of Waldeyer's ring and extranodal organs with high metabolic uptake such as spleen or bone marrow stimulated with G-CSF may be higher than that of mediastinal/hepatic blood pool. In this case, when assessing Complete Response (CR), it should be compared with the background level. | Long diameter (Ldi) of target lesions (lymph nodes) ≤ 1.5 cm |
| No extranodal lesions |
| Non-measurable lesions | Not Applicable | Disappearance (long diameter ≤ 1.5 cm for lymph node) |
| Organ enlargement | Not Applicable | Return to normal |
| New lesions | None | None |
| Bone marrow | No evidence of bone marrow FDG-sensitive disease | Morphologically normal, IHC test required to ensure negativity if uncertain. |
| PR | Lymph nodes and extranodal sites involved | 5PS score of 4-5 points, with uptake decreased compared with baseline, and the residual lesion can be of any size | Sum of up to 6 target lesions PPD (LDi x short axis perpendicular to LDi), i.e., ≥ 50% reduction in SPD |
| At interim assessment, the above indicates that the treatment is effective | When lesions are too small to measure: 5 mm x 5 mm |
| At end-stage assessment, the above indicates residual disease | When the lesion disappears: 0 mm x 0 mm |
| Non-measurable lesions | Not Applicable | Disappeared/normal, residual lesions/lesions not enlarged |
| Organ enlargement | Not Applicable | Spleen long diameter decrease > original long diameter increase by 50%; The normal size of the spleen is usually 13 cm. If it is 15 cm, the long diameter of the spleen should be ＜14 cm for the assessment of PR |
| New lesions | None | None |
| Bone marrow | Residual uptake is higher than normal bone marrow tissue but lower than baseline; If there are persistent nodular local abnormalities in the bone marrow, MRI or biopsy or interim assessment is required for further diagnosis | Not Applicable |
| SD | Target lesions (lymph nodes/nodal masses, extranodal lesions) | No metabolic response: 5PS score of 4-5 points in the interim/end-stage response assessment, and no significant change in metabolism compared with baseline | Up to 6 target lesions with < 50% increase in SPD without evidence of PD |
| Non-measurable lesions | Not Applicable | Not achieving PD |
| Organ enlargement | Not Applicable | Not achieving PD |
| New lesions | None | None |
| Bone marrow | Same as baseline | Not Applicable |
| PD | Separate target lesions (lymph nodes/nodal masses, extranodal lesions) | 5PS score of 4-5 points with increased uptake compared with baseline, and/or new increased uptake at the time of interim or end-stage response assessment | Diagnosis can be made if at least one target lesion has progressed, and lymph node/extranodal lesions must meet the following requirements:  LDi > 1.5 cm  ≥ 50% increase in PPD (relative to the minimum state)  Increase in LDi or SDi relative to the minimum state: 0.5 cm (lesions ≤ 2 cm) or 1.0 cm (lesions > 2 cm) |
| Spleen long diameter increase > original long diameter increase by 50%; The normal size of the spleen is usually 13 cm. If it is 15 cm, the long diameter of the spleen should be ＞16 cm.  If there is no splenomegaly at baseline, the long diameter should increase by at least 2 cm over the baseline;  New or recurrent splenomegaly |
| PD | Non-measurable lesions | None | Unequivocal progression of new lesions or previously non-measurable lesions |
| New lesions | Appearance of new lymphoma-related hypermetabolic lesions (excluding infection, inflammation, etc.). If the nature is not clear, a biopsy or interim assessment should be conducted. | Re-enlargement of previously resolved lesions |
| Any diameter of new lymph nodes >1.5 cm |
| Any diameter of new extranodal lesions >1.5 cm. If the diameter is ＜1.0 cm, it is necessary to determine whether the lesion is related to lymphoma |
| Unequivocal lymphoma-related lesions of any size |
| Bone marrow | New or recurrent high metabolic uptake | New or recurrent bone marrow involvement |

**Deauville's 5-point scale for PET response assessment:**

1 point: uptake ≤ background;

2 points: uptake ≤ mediastinal blood pool;

3 points: mediastinal blood pool < lesion uptake ≤ liver blood pool;

4 points: uptake > liver blood pool (mild);

5 points: uptake > liver blood pool (marked, SUVmax > 2 times liver blood pool) or new lesions;

X points: new abnormal uptake, considered to be unrelated to lymphoma;

*5SP score of 3 points: The prognosis is better with standard care in most subjects, especially for subjects receiving the interim assessment. However, in some clinical trials of stepped care, a score of 3 is considered to be less effective and undertreatment needs to be avoided.

**Measurable lesions:**

Up to 6 significant lymph nodes/fused lymph node masses, extranodal lesions, with both dimensions easily measurable;

(1) Lymph nodes: Lymph nodes should be categorized by region; if there is enlargement of mediastinal and retroperitoneal lymph nodes, these lesions should be included; measurable lymph nodes should have a long diameter greater than 1.5 cm.

(2) Non-nodal lesions: These include lesions in solid organs (such as the liver, spleen, kidneys, lungs, etc.), the digestive tract, skin, or labeled parts accessible to palpation. Measurable extranodal lesions should have a long diameter greater than 1.0 cm.

**Non-measurable lesions:**

Any significant lesions that are not measurable/evaluable are considered non-measurable. They include:

1. Any lymph nodes/fused lymph node masses, extranodal lesions, i.e., any parts that are not selected as significant, or measurable, or do not meet the measurable criteria but are still considered to be lesions;
2. Considered as disease involvement that is difficult to quantify and measure, such as pleural effusion, ascites, bone metastases, leptomeningeal involvement, and abdominal mass lesions, etc.
3. Other undiagnosed lesions requiring imaging follow-up;

Waldeyer's ring and extranodal sites (e.g., gastrointestinal tract, liver, bone marrow): When assessing Complete Response (CR), the uptake of FDG may be higher than that in the mediastinum, but it should not exceed the surrounding background level (for example, the bone marrow may generally show increased metabolic activity due to chemotherapy or the use of G-CSF).

**Appendix 6: List of Laboratory Tests**

| **Item** | **Blood biochemistry** | **Hematology** | **Coagulation function** | **Viral testing** | **Urinalysis** |
| --- | --- | --- | --- | --- | --- |
| **1** | TP (total protein) | WBC (total white blood cell count) | PT (prothrombin time) | HBsAg (hepatitis B surface antigen) | Specific gravity |
| **2** | Alb (albumin) | LY% (lymphocyte percentage) | APTT (activated partial thromboplastin time) | HBsAb (hepatitis B surface antibody) | Acidity or alkalinity |
| **3** | TBil (total bilirubin) | LY # (absolute lymphocyte count) | INR (international normalized ratio) | HBeAg (hepatitis B e antigen) | Urine glucose |
| **4** | DBil (direct bilirubin)/IBil (indirect bilirubin) | MO% (monocyte percentage) | FIB/FBG (fibrinogen) | HBeAb (hepatitis B e antibody) | Urine ketone body |
| **5** | TBA (total bile acids) | MO # (absolute monocyte count) |  | HBcAb (hepatitis B core antibody) | Urobilinogen |
| **6** | ALT (alanine aminotransferase) | NE% (neutrophil percentage) |  | HIV-comb (HIV antigen-antibody combination test) | Urine bilirubin |
| **7** | AST (aspartate aminotransferase) | NE # (absolute neutrophil count) |  | Anti-TP (Treponema pallidum specific antibody) | Urinary occult blood |
| **8** | ALP (alkaline phosphatase) | EO% (eosinophil percentage) |  | Anti-HCV (hepatitis C virus antibody) | Urine protein |
| **9** | GGT (gamma glutamyl transferase) | EO # (absolute eosinophil count) |  |  | Nitrite urine |
| **10** | Urea | BA% (basophil percentage) |  |  | Urine white blood cells |
| **11** | Crea (Creatinine) | BA # (absolute basophil count) |  |  | Urine red blood cells |
| **12** | UA (uric acid) | RBC (total red blood cell count) |  |  | Urinary casts |
| **13** | Glu (glucose) | HGB (hemoglobin) |  |  |  |
| **14** | K (potassium) | HCT (hematocrit) |  |  |  |
| **15** | Na (sodium) | MCV (mean corpuscular volume) |  |  |  |
| **16** | Cl (chlorine) | MCH (mean corpuscular hemoglobin) |  |  |  |
| **17** | Ca (calcium) | MCHC (mean corpuscular hemoglobin concentration) |  |  |  |
| **18** | P (phosphorus) | PLT (total platelet count) |  |  |  |
| **19** | Mg (magnesium) |  |  |  |  |
| **20** | TCHO (total cholesterol) |  |  |  |  |
| **21** | A/G (albumin/globulin) |  |  |  |  |
| **22** | TG (triglyceride) |  |  |  |  |
| **23** | HDL-C (high density lipoprotein cholesterol) |  |  |  |  |
| **24** | LDL-C (low density lipoprotein cholesterol) |  |  |  |  |
| **25** | Apo A1 (apolipoprotein A1) |  |  |  |  |
| **26** | Apo B (apolipoprotein B) |  |  |  |  |
| **27** | LDH (lactate dehydrogenase) |  |  |  |  |
| **28** | CK (creatine kinase) |  |  |  |  |

**Appendix 7: Descriptive Summary of Cases Consistent with** **Hy's Law**

Descriptive summary of cases consistent with Hy's law should include the following information:

(1) Subject's age, sex, weight and height;

(2) Signs and symptoms associated with hepatotoxicity, including their type, occurrence and duration;

(3) Relationship between exposure time, dose and occurrence of liver injury;

(4) Relevant medical history;

(5) Concomitant medications and their dates and doses;

(6) Relevant test results, such as physical examination findings, laboratory data, liver biopsy results and reports, with dates and normal ranges;

(7) Time course of elevation of aminotransferase and bilirubin;

(8) All relevant clinical information known, including: past or current history of alcohol consumption; evidence of previous or current viral hepatitis, NASH or other liver disease; symptoms and clinical course including follow-up until resolution; special examinations (e.g., imaging);

(9) Treatment provided;

(10) Completed drug discontinuation (dechallenge) and resumption (rechallenge) results;

(11) Treatment results and follow-up information;

(12) Copies of discharge summary, pathology or autopsy reports.

**References:**

1. Teras LR, DeSantis CE, Cerhan JR, Morton LM, Jemal A, Flowers CR: 2016 US lymphoid malignancy statistics by World Health Organization subtypes. *CA Cancer J Clin* 2016, 66(6):443-459.

2. Fu S, Wang M, Lairson DR, Li R, Zhao B, Du XL: Trends and variations in mantle cell lymphoma incidence from 1995 to 2013: A comparative study between Texas and National SEER areas. *Oncotarget* 2017, 8(68):112516-112529.

3. Sant M, Allemani C, Tereanu C, De Angelis R, Capocaccia R, Visser O, Marcos-Gragera R, Maynadie M, Simonetti A, Lutz JM *et al*: Incidence of hematologic malignancies in Europe by morphologic subtype: results of the HAEMACARE project. *Blood* 2010, 116(19):3724-3734.

4. Nair R, Arora N, Mallath MK: Epidemiology of Non-Hodgkin's Lymphoma in India. *Oncology* 2016, 91 Suppl 1:18-25.

5. Sun J, Yang Q, Lu Z, He M, Gao L, Zhu M, Sun L, Wei L, Li M, Liu C *et al*: Distribution of lymphoid neoplasms in China: analysis of 4,638 cases according to the World Health Organization classification. *Am J Clin Pathol* 2012, 138(3):429-434.

6. Lenz G, Dreyling M, Hoster E, Wormann B, Duhrsen U, Metzner B, Eimermacher H, Neubauer A, Wandt H, Steinhauer H *et al*: Immunochemotherapy with rituximab and cyclophosphamide, doxorubicin, vincristine, and prednisone significantly improves response and time to treatment failure, but not long-term outcome in patients with previously untreated mantle cell lymphoma: results of a prospective randomized trial of the German Low Grade Lymphoma Study Group (GLSG). *J Clin Oncol* 2005, 23(9):1984-1992.

7. Robak T, Huang H, Jin J, Zhu J, Liu T, Samoilova O, Pylypenko H, Verhoef G, Siritanaratkul N, Osmanov E *et al*: Bortezomib-based therapy for newly diagnosed mantle-cell lymphoma. *N Engl J Med* 2015, 372(10):944-953.

8. Rummel MJ, Niederle N, Maschmeyer G, Banat GA, von Grunhagen U, Losem C, Kofahl-Krause D, Heil G, Welslau M, Balser C *et al*: Bendamustine plus rituximab versus CHOP plus rituximab as first-line treatment for patients with indolent and mantle-cell lymphomas: an open-label, multicentre, randomised, phase 3 non-inferiority trial. *Lancet* 2013, 381(9873):1203-1210.

9. Bega G, Olivieri J, Riva M, Scapinello G, Paolini R, Finotto S, Sartori R, Lucchini E, Guandalini G, Facchinelli D *et al*: Rituximab and Bendamustine (BR) Compared with Rituximab, Bendamustine, and Cytarabine (R-BAC) in Previously Untreated Elderly Patients with Mantle Cell Lymphoma. *Cancers (Basel)* 2021, 13(23).

10. Goy A, Bernstein SH, Kahl BS, Djulbegovic B, Robertson MJ, de Vos S, Epner E, Krishnan A, Leonard JP, Lonial S *et al*: Bortezomib in patients with relapsed or refractory mantle cell lymphoma: updated time-to-event analyses of the multicenter phase 2 PINNACLE study. *Ann Oncol* 2009, 20(3):520-525.

11. Trneny M, Lamy T, Walewski J, Belada D, Mayer J, Radford J, Jurczak W, Morschhauser F, Alexeeva J, Rule S *et al*: Lenalidomide versus investigator's choice in relapsed or refractory mantle cell lymphoma (MCL-002; SPRINT): a phase 2, randomised, multicentre trial. *Lancet Oncol* 2016, 17(3):319-331.

12. Zinzani PL, Vose JM, Czuczman MS, Reeder CB, Haioun C, Polikoff J, Tilly H, Zhang L, Prandi K, Li J *et al*: Long-term follow-up of lenalidomide in relapsed/refractory mantle cell lymphoma: subset analysis of the NHL-003 study. *Ann Oncol* 2013, 24(11):2892-2897.

13. Dreyling M, Jurczak W, Jerkeman M, Silva RS, Rusconi C, Trneny M, Offner F, Caballero D, Joao C, Witzens-Harig M *et al*: Ibrutinib versus temsirolimus in patients with relapsed or refractory mantle-cell lymphoma: an international, randomised, open-label, phase 3 study. *Lancet* 2016, 387(10020):770-778.

14. Wang ML, Rule S, Martin P, Goy A, Auer R, Kahl BS, Jurczak W, Advani RH, Romaguera JE, Williams ME *et al*: Targeting BTK with ibrutinib in relapsed or refractory mantle-cell lymphoma. *N Engl J Med* 2013, 369(6):507-516.

15. Byrd JC, Brown JR, O'Brien S, Barrientos JC, Kay NE, Reddy NM, Coutre S, Tam CS, Mulligan SP, Jaeger UJNEJoM: Ibrutinib versus ofatumumab in previously treated chronic lymphoid leukemia. 2014, 371(3):213-223.

16. Wang M, Rule S, Zinzani PL, Goy A, Casasnovas O, Smith SD, Damaj G, Doorduijn J, Lamy T, Morschhauser FJTL: Acalabrutinib in relapsed or refractory mantle cell lymphoma (ACE-LY-004): a single-arm, multicentre, phase 2 trial. 2018, 391(10121):659-667.

17. Tam C, Grigg AP, Opat S, Ku M, Gilbertson M, Anderson MA, Seymour JF, Ritchie DS, Dicorleto C, Dimovski B: The BTK inhibitor, Bgb-3111, is safe, tolerable, and highly active in patients with relapsed/refractory B-cell malignancies: initial report of a phase 1 first-in-human trial. In*.*: American Society of Hematology Washington, DC; 2015.

18. Zhang SQ, Smith SM, Zhang SY, Wang YL: Mechanisms of ibrutinib resistance in chronic lymphocytic leukaemia and non-Hodgkin lymphoma. *British Journal of Haematology* 2015, 170(4):445-456.

19. Woyach JA, Furman RR, Liu TM, Ozer HG, Zapatka M, Ruppert AS, Xue L, Li DH, Steggerda SM, Versele M *et al*: Resistance mechanisms for the Bruton's tyrosine kinase inhibitor ibrutinib. *N Engl J Med* 2014, 370(24):2286-2294.

20. Zhao X, Lwin T, Silva A, Shah B, Tao J, Fang B, Zhang L, Fu K, Bi C, Li J *et al*: Unification of de novo and acquired ibrutinib resistance in mantle cell lymphoma. *Nat Commun* 2017, 8:14920.

21. FDA: JAYPIRCA Label. 2023, https://www.accessdata.fda.gov/drugsatfda_docs/label/2023/216059Orig1s000Corrected_lbl.pdf.

22. Byrd JC, Smith S, Wagner-Johnston N, Sharman J, Chen AI, Advani R, Augustson B, Marlton P, Commerford SR, Okrah KJO: First-in-human phase 1 study of the BTK inhibitor GDC-0853 in relapsed or refractory B-cell NHL and CLL. 2018, 9(16):13023.

23. Fabian CA, Reiff SD, Guinn D, Neuman L, Fox JA, Wilson W, Byrd JC, Woyach JA, Johnson AJJCR: SNS-062 demonstrates efficacy in chronic lymphocytic leukemia in vitro and inhibits C481S mutated Bruton tyrosine kinase. 2017, 77(13 supplement):1207.

24. Johnson AR, Kohli PB, Katewa A, Gogol E, Belmont LD, Choy R, Penuel E, Burton L, Eigenbrot C, Yu CJAcb: Battling Btk mutants with noncovalent inhibitors that overcome Cys481 and Thr474 mutations. 2016, 11(10):2897-2907.

25. Rickert RC: New insights into pre-BCR and BCR signalling with relevance to B cell malignancies. *Nature Reviews Immunology* 2013, 13(8):578-591.

26. Kraus M, Alimzhanov MB, Rajewsky N, Rajewsky K: Survival of Resting Mature B Lymphocytes Depends on BCR Signaling via the Ig$\upalpha$/$\upbeta$ Heterodimer. *Cell* 2004, 117(6):787-800.

27. Havranek O, Xu J, Köhrer S, Wang Z, Becker L, Comer JM, Henderson J, Ma W, Ma JMC, Westin JR *et al*: Tonic B-cell receptor signaling in diffuse large B-cell lymphoma. *Blood* 2017, 130(8):995-1006.

28. Martínez N, Almaraz C, Vaqué JP, Varela I, Derdak S, Beltran S, Mollejo M, Campos-Martin Y, Agueda L, Rinaldi A *et al*: Whole-exome sequencing in splenic marginal zone lymphoma reveals mutations in genes involved in marginal zone differentiation. *Leukemia* 2013, 28(6):1334-1340.

29. Krysiak K, Gomez F, White BS, Matlock M, Miller CA, Trani L, Fronick CC, Fulton RS, Kreisel F, Cashen AF *et al*: Recurrent somatic mutations affecting B-cell receptor signaling pathway genes in follicular lymphoma. *Blood* 2017, 129(4):473-483.

30. Corso J, Pan K-T, Walter R, Doebele C, Mohr S, Bohnenberger H, Ströbel P, Lenz C, Slabicki M, Hüllein J *et al*: Elucidation of tonic and activated B-cell receptor signaling in Burkitt's lymphoma provides insights into regulation of cell survival. *Proceedings of the National Academy of Sciences* 2016, 113(20):5688-5693.

31. Burger JA, Wiestner A: Targeting B cell receptor signalling in cancer: preclinical and clinical advances. *Nature Reviews Cancer* 2018, 18(3):148-167.

32. Weber ANR, Bittner Z, Liu X, Dang T-M, Radsak MP, Brunner C: Bruton's Tyrosine Kinase: An Emerging Key Player in Innate Immunity. *Frontiers in Immunology* 2017, 8.

33. Buhl AM, Cambier JCJTJoI: Phosphorylation of CD19 Y484 and Y515, and linked activation of phosphatidylinositol 3-kinase, are required for B cell antigen receptor-mediated activation of Bruton’s tyrosine kinase. 1999, 162(8):4438-4446.

34. Vetrie D, Vo\vrechovsk\'y I, Sideras P, Holland J, Davies A, Flinter F, Hammarström L, Kinnon C, Levinsky R, Bobrow M *et al*: The gene involved in X-linked agammaglobulinaemia is a member of the src family of protein-tyrosine kinases. *Nature* 1993, 361(6409):226-233.

35. Tsukada S, Saffran DC, Rawlings DJ, Parolini O, Allen RC, Klisak I, Sparkes RS, Kubagawa H, Mohandas T, Quan S *et al*: Deficient expression of a B cell cytoplasmic tyrosine kinase in human X-linked agammaglobulinemia. *Cell* 1993, 72(2):279-290.

36. MOHAMED, NORE, CHRISTENSSON, SMITH: Signalling of Bruton\textquotesingles Tyrosine Kinase, Btk. *Scandinavian Journal of Immunology* 1999, 49(2):113-118.

37. Wahl MI, Fluckiger A-C, Kato RM, Park H, Witte ON, Rawlings DJ: Phosphorylation of two regulatory tyrosine residues in the activation of Bruton\textquotesingles tyrosine kinase via alternative receptors. *Proceedings of the National Academy of Sciences* 1997, 94(21):11526-11533.

38. Mohamed AJ, Yu L, Bäckesjö C-M, Vargas L, Faryal R, Aints A, Christensson B, Berglöf A, Vihinen M, Nore BF *et al*: Bruton's tyrosine kinase (Btk): function, regulation, and transformation with special emphasis on the PH domain. *Immunological Reviews* 2009, 228(1):58-73.

39. Paolo JAD, Huang T, Balazs M, Barbosa J, Barck KH, Bravo BJ, Carano RAD, Darrow J, Davies DR, DeForge LE *et al*: Specific Btk inhibition suppresses B cell\textendash and myeloid cell\textendashmediated arthritis. *Nature Chemical Biology* 2010, 7(1):41-50.

40. Hendriks RW, de Bruijn MF, Maas A, Dingjan GM, Karis A, Grosveld F: Inactivation of Btk by insertion of lacZ reveals defects in B cell development only past the pre-B cell stage. *The EMBO Journal* 1996, 15(18):4862-4872.

41. Vihinen M, Belohradsky BH, Haire RN, Holinski-Feder E, Kwan S-P, Lappalainen I, Lehvaslaiho H, Lester T, Meindl A, Ochs HD *et al*: BTKbase, mutation database for X-linked agammaglobulinemia (XLA). *Nucleic Acids Research* 1997, 25(1):166-171.

42. Thomas J, Sideras P, Smith C, Vorechovsky I, Chapman V, Paul W: Colocalization of X-linked agammaglobulinemia and X-linked immunodeficiency genes. *Science* 1993, 261(5119):355-358.

43. Qiu Y, Kung H-J: Signaling network of the Btk family kinases. *Oncogene* 2000, 19(49):5651-5661.

44. Cinar M, Hamedani F, Mo Z, Cinar B, Amin HM, Alkan S: Bruton tyrosine kinase is commonly overexpressed in mantle cell lymphoma and its attenuation by Ibrutinib induces apoptosis. *Leuk Res* 2013, 37(10):1271-1277.

45. Boyd RS, Jukes-Jones R, Walewska R, Brown D, Dyer MJ, Cain K: Protein profiling of plasma membranes defines aberrant signaling pathways in mantle cell lymphoma. *Mol Cell Proteomics* 2009, 8(7):1501-1515.

46. Pighi C, Gu TL, Dalai I, Barbi S, Parolini C, Bertolaso A, Pedron S, Parisi A, Ren J, Cecconi D *et al*: Phospho-proteomic analysis of mantle cell lymphoma cells suggests a pro-survival role of B-cell receptor signaling. *Cell Oncol (Dordr)* 2011, 34(2):141-153.

47. Chang BY, Francesco M, De Rooij MF, Magadala P, Steggerda SM, Huang MM, Kuil A, Herman SE, Chang S, Pals ST *et al*: Egress of CD19(+)CD5(+) cells into peripheral blood following treatment with the Bruton tyrosine kinase inhibitor ibrutinib in mantle cell lymphoma patients. *Blood* 2013, 122(14):2412-2424.

48. Davis RE, Ngo VN, Lenz G, Tolar P, Young RM, Romesser PB, Kohlhammer H, Lamy L, Zhao H, Yang Y *et al*: Chronic active B-cell-receptor signalling in diffuse large B-cell lymphoma. *Nature* 2010, 463(7277):88-92.

49. Young RM, Staudt LM: Targeting pathological B cell receptor signalling in lymphoid malignancies. *Nature Reviews Drug Discovery* 2013, 12(3):229-243.

50. Tam CS, Opat S, Simpson D, Cull G, Munoz J, Phillips TJ, Kim WS, Rule S, Atwal SK, Wei R *et al*: Zanubrutinib for the treatment of relapsed or refractory mantle cell lymphoma. *Blood Adv* 2021, 5(12):2577-2585.

51. Wang M, Rule S, Zinzani PL, Goy A, Casasnovas O, Smith SD, Damaj G, Doorduijn J, Lamy T, Morschhauser F *et al*: Acalabrutinib in relapsed or refractory mantle cell lymphoma (ACE-LY-004): a single-arm, multicentre, phase 2 trial. *Lancet* 2018, 391(10121):659-667.
