# Supplementary material
Source: Research Square preprint supplement (doi:10.21203/rs.3.rs-9538133/v1)
Supplement: Supplementary file 2 [file c60f5b3f1580722152ef349a.docx]

**Statistical Analysis Plan**

**(Version 1.0)**

| **Protocol No.:** | LP-168-CN201 |
| --- | --- |
| **Study Drug:** | Rocbrutinib (LP-168) |
| **Study Title:** | An Open-Label, Single-Arm, Multicenter Phase 2 Clinical Study to Evaluate the Efficacy and Safety of LP-168 in Relapsed or Refractory Mantle Cell Lymphoma |
| **Clinical Phase:** | Phase 2 |
| **Sponsor:** | Guangzhou Lupeng Pharmaceutical Co., Ltd. |
| **Leading Study Site:** | Beijing Cancer Hospital |
| **Statistical Analysis Unit:** | Guangdong Janus Medical Technology Co., Ltd. |
| **Protocol Version/Date:** | V1.1/ October 10, 2023 |

[Seal] Guangdong Janus Medical Technology Co., Ltd.

**Confidentiality Statement**

The information contained in this document, particularly unpublished data, is the property of or is under the control of Guangzhou Lupeng Pharmaceutical Co., Ltd. It is hereby provided in confidence to you, as a researcher, potential researcher, or consultant, and is intended solely for review by you, your staff, and the relevant Ethics Committee. All information is provided only for your use when you are authorized to conduct the clinical study of the study drug described in this protocol. No information contained herein may be disclosed to any other person without the written consent of Guangzhou Lupeng Pharmaceutical Co., Ltd., except to the extent necessary for obtaining informed consent from those individuals who may receive the drug.

# Revision History

| **Version No.** | **Version Date** | **Reason for Change/Revision** | **Superseded Version** |
| --- | --- | --- | --- |
| 1.0 | December 26, 2024 | First draft | NA |

# Signature Page

**Approval**

I have reviewed this document and confirm that its content accurately and truly reflects the Statistical Analysis Plan of the LP-168-CN201 study of Guangzhou Lupeng Pharmaceutical Co., Ltd.

|  | **Author:** | 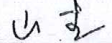 |  | December 26, 2024 |
| --- | --- | --- | --- | --- |
|  |  | Jie Shan  Statistician  Guangdong Janus Medical Technology Co., Ltd. |  | Date (MM/DD/YYYY) |
|  | **Reviewed by:** | 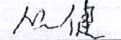 |  | December 26, 2024 |
|  |  | Jian Lun  Statistician  Guangdong Janus Medical Technology Co., Ltd. |  | Date (MM/DD/YYYY) |
|  | **Reviewed by:** | 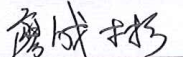 |  | December 26, 2024 |
|  |  | Chengbin Liao  PK Statistician  Guangdong Janus Medical Technology Co., Ltd. |  | Date (MM/DD/YYYY) |

**Meaning of Signature**

The signatures on the “Signature Page” of this document have the following meaning:

| **Signer** | **Certification** |
| --- | --- |
| **Author** | By signing, the author confirms that the contents of this document are complete and accurate. |
| **Reviewer** | By signing, the reviewer confirms that the methods and content of this document are consistent with the study protocol, relevant regulatory requirements, and key applicable guideline documents. The reviewer has reviewed this document to ensure its accuracy and completeness. |

# Signature Page

**Approval**

I have reviewed this document and confirm that its content accurately and truly reflects the Statistical Analysis Plan of the LP-168-CN201 study of Guangzhou Lupeng Pharmaceutical Co., Ltd.

| **Reviewed by:** | 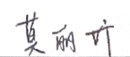 |  | December 26, 2024 |
| --- | --- | --- | --- |
|  | Liting Mo  Project Manager  Guangzhou Lupeng Pharmaceutical Co., Ltd. |  | Date (MM/DD/YYYY) |
| **Reviewed by:** | 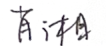 |  | December 26, 2024 |
|  | Xiang Xiao  Senior Medical Manager  Guangzhou Lupeng Pharmaceutical Co., Ltd. |  | Date (MM/DD/YYYY) |
| **Reviewed by:** | 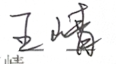 |  | December 26, 2024 |
|  | Zheng Wang  Senior Medical Manager (Clinical Pharmacology)  Guangzhou Lupeng Pharmaceutical Co., Ltd. |  | Date (MM/DD/YYYY) |
| **Reviewed by:** | 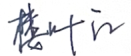 |  | December 26, 2024 |
|  | Yejiang Lou  Senior Medical Director  Guangzhou Lupeng Pharmaceutical Co., Ltd. |  | Date (MM/DD/YYYY) |

**Meaning of Signature**

The signatures on the “Signature Page” of this document have the following meaning:

| **Signer** | **Certification** |
| --- | --- |
| **Reviewer** | By signing, the reviewer confirms that the methods and content of this document are consistent with the study protocol, relevant regulatory requirements, and key applicable guideline documents. The reviewer has reviewed this document to ensure its accuracy and completeness. |

# Table of Contents

[Revision History 2](#_Toc5592)

[Signature Page 3](#_Toc18138)

[Signature Page 4](#_Toc27257)

[Table of Contents 5](#_Toc24923)

[List of Abbreviations 7](#_Toc1640)

[1. Study Overview 8](#_Toc11607)

[1.1 Study Objectives 8](#_Toc7351)

[1.1.1 Primary Objective 8](#_Toc28356)

[1.1.2 Secondary Objectives 8](#_Toc29188)

[1.1.3 Exploratory Objectives 8](#_Toc11838)

[1.2 Overall Study Design 8](#_Toc20750)

[1.3 Randomized, Blinded and Controlled 9](#_Toc9685)

[1.4 Sample Size Estimation 9](#_Toc25800)

[2. Study Endpoints 10](#_Toc20812)

[2.1 Primary Endpoints 10](#_Toc11289)

[2.2 Secondary Endpoints 10](#_Toc9553)

[2.3 Exploratory Endpoints 10](#_Toc7355)

[3. Analysis Populations 10](#_Toc19831)

[4. Statistical Considerations 11](#_Toc30153)

[4.1 General Statistical Issues/Considerations 11](#_Toc3829)

[4.1.1 Interim Analysis 11](#_Toc2041)

[4.1.2 Multi-center Study 11](#_Toc7807)

[4.1.3 Covariate Adjustment 12](#_Toc10409)

[4.1.4 Subgroup Classification 12](#_Toc27051)

[4.2 General Data Processing 13](#_Toc28178)

[4.2.1 Analysis Visit Window 13](#_Toc6342)

[4.2.2 Derivation of Efficacy Endpoints 13](#_Toc1638)

[4.2.3 Handling of Missing Values and Outliers 15](#_Toc29697)

[4.2.4 Unscheduled Safety Evaluation 19](#_Toc18605)

[4.2.5 Derived Variables/Definitions 19](#_Toc28513)

[4.3 Presentation of Statistical Summary and Analysis Results 20](#_Toc21902)

[5. Statistical Analysis 21](#_Toc31449)

[5.1 Study Subjects 21](#_Toc3953)

[5.1.1 Subject Distribution 21](#_Toc24687)

[5.1.2 Protocol Deviations 21](#_Toc11416)

[5.1.3 Demographics and Baseline Characteristics 21](#_Toc2146)

[5.1.4 Prior MCL-Related Therapies 23](#_Toc31525)

[5.1.5 Prior Non-MCL Medical History 24](#_Toc31657)

[5.1.6 Prior Non-MCL-related Surgical History 25](#_Toc28197)

[5.1.7 Prior/Concomitant Medication 25](#_Toc32583)

[5.1.8 Prior/Concomitant Non-drug Therapies 25](#_Toc1045)

[5.1.9 Study Treatment Exposure and Compliance 26](#_Toc14139)

[5.2 Efficacy Analysis 27](#_Toc23173)

[5.2.1 Hypothesis Testing and Multiplicity Considerations 27](#_Toc30246)

[5.2.2 Primary Estimand Analysis 28](#_Toc8120)

[5.2.3 Secondary Efficacy Analysis 29](#_Toc18131)

[5.3 Safety Analysis 31](#_Toc23165)

[5.3.1 Adverse Events 31](#_Toc26435)

[5.3.2 Laboratory Tests 34](#_Toc401)

[5.3.3 Vital Signs and Weight 36](#_Toc26871)

[5.3.4 12-lead ECG 36](#_Toc26439)

[5.3.5 Physical Examination 37](#_Toc2174)

[5.3.6 ECOG PS 38](#_Toc25427)

[5.3.7 Death 38](#_Toc7835)

[5.4 Quality of Life (QoL) Assessment 38](#_Toc13275)

[5.5 Pharmacokinetic Analysis 39](#_Toc24450)

[5.5.1 PK Concentration 39](#_Toc6216)

[5.5.2 PK Parameters 40](#_Toc243)

[6. Interim Analysis 41](#_Toc31597)

[7. Changes from Protocol-Specified Statistical Methods 41](#_Toc26176)

[8. List of Statistical Tables, Figures and Listings 42](#_Toc28659)

[9. Appendices 42](#_Toc10630)

[Appendix I AE Classification and Consolidated PT Rules 42](#_Toc6455)

# List of Abbreviations

| **English Abbreviations** | **English Full Name** |
| --- | --- |
|  |  |
| AE | Adverse Event |
| AESI | Adverse Event of Special Interest |
| ATC | Anatomical Therapeutic Chemical |
| BMI | Body Mass Index |
| BOR | Best Overall Response |
| CR | Complete Response |
| CTCAE | Common Terminology Criteria for Adverse Event |
| DOR | Duration of Response |
| ECG | Electrocardiogram |
| ECOG | Eastern Cooperative Oncology Group |
| eCRF | Electronic Case Report Form |
| FAS | Full Analysis Set |
| IPI | International Prognostic Index |
| IRC | Independent Review Committee |
| LLOQ | Lower Limit of Quantification |
| MCL | Mantle Cell Lymphoma |
| MedDRA | Medical Dictionary for Regulatory Activities |
| mFAS | modified Full Analysis Set |
| MIPI | Mantle Cell Lymphoma International Prognostic Index |
| ORR | Objective Response Rate |
| OS | Overall Survival |
| PD | Progressive Disease |
| PFS | Progression Free Survival |
| PK | Pharmacokinetics |
| PKS | Pharmacokinetics Set |
| PN | Preferred Name |
| PPS | Per Protocol Set |
| PR | Partial Response |
| PT | Preferred Term |
| QoL | Quality of Life |
| R/R | Relapse/Refractory |
| RS | Raw Score |
| SAE | Serious Adverse Event |
| SD | Stable Disease |
| SOC | System Organ Class |
| SS | Safety Analysis Set |
| TEAE | Treatment-emergent Adverse Event |
| TTR | Time to Response |
| WHO | World Health Organization |
|  |  |

# Study Overview

This is a single-arm, open-label, multicenter Phase 2 clinical study to evaluate the efficacy and safety of Rocbrutinib in subjects with relapsed or refractory MCL.

This statistical analysis plan (SAP) will provide a description of the statistical analysis methods and data processing principles of this study, so as to analyze and report the efficacy, safety and pharmacokinetic (PK) characteristics of the study drug. This statistical analysis plan is based on the LP-168-CN201 study protocol version 1.1 (version date: October 10, 2023), and this SAP may be modified accordingly with the amendment of the study protocol.

## Study Objectives

### Primary Objective

To evaluate the overall response rate (ORR) of Rocbrutinib in subjects with relapsed or refractory mantle cell lymphoma (R/R MCL).

### Secondary Objectives

1. To evaluate the complete response (CR) rate, progression-free survival (PFS), overall survival (OS), duration of response (DOR), and time to response (TTR) in subjects with R/R MCL treated with Rocbrutinib.
2. To evaluate the safety and tolerability of Rocbrutinib monotherapy in subjects with R/R MCL.
3. To evaluate the improvement in quality of life (QoL) by Rocbrutinib monotherapy in subjects with R/R MCL as measured by the EORTC QLQ-C30 questionnaire.
4. To evaluate the pharmacokinetic (PK) characteristics of Rocbrutinib.

### Exploratory Objectives

1. To evaluate the correlation of potential biomarkers in lymphoma tissue or circulating lymphoma cells with efficacy of Rocbrutinib monotherapy, etc.
2. To evaluate the intrinsic or extrinsic factors that may affect exposure to the study drug.

## Overall Study Design

This is a single-arm, open-label, multicenter Phase 2 clinical study to evaluate the efficacy and safety of Rocbrutinib in subjects with relapsed or refractory MCL. In this study, it is planned to enroll approximately 62 subjects with MCL who failed, or relapsed after achieving a response or were intolerant to a Bruton's tyrosine kinase (BTK) inhibitor and an immunochemotherapy. Eligible subjects will take Rocbrutinib 150 mg with approximately 240 mL of water once daily before meals (except for the period from 1 hour before to 2 hours after a meal) at a fixed time each day as far as possible in 28-day treatment cycles until disease progression, unacceptable toxicity, or satisfaction of other criteria for treatment termination. The primary study endpoint is ORR as assessed by the Independent Review Committee (IRC).

## Randomized, Blinded and Controlled

Not applicable.

## Sample Size Estimation

The sample size will be estimated based on the single-group target value test of ORR.

The target value is obtained based on previous treatment efficacy or clinical experience data of the indicated population. A retrospective study with a sample size of 31 patients showed that the ORR of salvage chemotherapy in patients with R/R MCL who had received 2 prior lines of therapy (including BTK inhibitors) was 32% (95% CI: 16%–48%). Another observational study with a sample size of 58 patients showed that the ORR of lenalidomide-based therapy in patients with R/R MCL who had received 4 prior lines of therapy (including BTK inhibitors) was 29% (95% CI: 17%–41%). The pooled ORR of the two studies was 30% (95% CI: 21%–40%).

Table 1 ORR data for R/R MCL patients previously treated with BTK inhibitors

| Therapeutic regimen | Sample Size | ORR and its 95% CI |
| --- | --- | --- |
| Salvage chemotherapy | 31 | 32% (16% - 48%) |
| Lenalidomide-based therapy | 58 | 29% (17% - 41%) |
| Total | 89 | 30% (21% - 40%) |

In summary, 30% is selected as the ORR target value. Assuming that the study drug can improve ORR to 50% and the type I error is controlled within 2.5% (one-sided test), 55 subjects can provide a power of not less than 85% to demonstrate that the ORR of Rocbrutinib is superior to 30% of the target value. Considering a dropout rate of approximately 10%, 62 subjects are planned to be enrolled.

# Study Endpoints

## Primary Endpoints

Overall Response Rate (ORR) as assessed by the Independent Review Committee (IRC) according to the Lugano 2014 Response Criteria. ORR is defined as the proportion of subjects achieving a best overall response of CR or PR.

## Secondary Endpoints

1. ORR as assessed by the investigator according to the Lugano 2014 Response Criteria.
2. CR rate, PFS, OS, DOR, and TTR by IRC or investigator assessment.
3. Safety evaluation including vital signs, physical examination, electrocardiogram (ECG) parameters, ECOG performance status, laboratory tests, and adverse events (AEs).
4. Change in patient-reported quality of life as assessed by the EORTC QLQ-C30 questionnaire.
5. PK characteristics of Rocbrutinib and the correlation of exposure with efficacy and safety. Parameters related to PK characteristics mainly include maximum concentration (Cmax), time to maximum concentration (Tmax), half-life (T1/2), area under plasma concentration-time curve (AUC0-t, AUC0-∞), clearance (CL/F) and apparent volume of distribution (Vd/F) and other pharmacokinetic parameters.

## Exploratory Endpoints

1. To evaluate the correlation of potential biomarkers (e.g., BTK mutation, PLC mutation, and TP53 mutation)in lymphoma tissue/circulating lymphoma cells with efficacy of Rocbrutinib monotherapy
2. A population pharmacokinetic model of Rocbrutinib will be established to evaluate the effect of intrinsic or extrinsic factors such as age, liver function and renal function on the exposure to the study drug by investigating the covariates in the model.

# Analysis Populations

The analysis datasets specified in this study include the Full Analysis Set (FAS), modified Full Analysis Set (mFAS), Safety Analysis Set (SS), Per-protocol Set (PPS), and Pharmacokinetics Set (PKS).

- Safety Analysis Set (SS): All subjects who have received at least one dose of the study drug.
- Full Analysis Set (FAS): It is consistent with population definition in the primary estimation objectives. Based on the principle of intention-to-treat (ITT), all subjects with R/R MCL who have received at least one dose of the study drug will be included in the FAS. Subjects with R/R MCL in the FAS require pathological confirmation by the central laboratory.
- Modified Full Analysis Set (mFAS): Based on the intention-to-treat (ITT) principle, all subjects with R/R MCL who have received at least 14 days of the study drug treatment or undergone one efficacy assessment (or were judged by the investigator to have an obvious trend of progression). Subjects with R/R MCL in the mFAS require pathological confirmation by the central laboratory.
- Per-protocol Set (PPS): It includes the subjects in the Full Analysis Set (FAS) with good compliance (80%–120% inclusive), available primary efficacy endpoints (at least one post-baseline efficacy assessment), and no major protocol deviations affecting efficacy data.
- Pharmacokinetics Set (PKS): All subjects who have received at least one dose of the study drug, have available pharmacokinetic data (biological samples collected), and have not committed protocol violations that significantly affect PK results.

The definition of the above analysis populations will be discussed and confirmed at the data review meeting prior to database lock. For each subject excluded from any analysis population, the reason shall be explained at the data review meeting and documented in writing prior to database lock.

# Statistical Considerations

## General Statistical Issues/Considerations

### Interim Analysis

No interim analysis is planned in this study.

### Multi-center Study

This study is intended to be conducted at approximately 30 sites in China, with the actual number of sites being 41. The impact of the site effect is not taken into account.

### Covariate Adjustment

No covariate adjustment is involved in this study.

### Subgroup Classification

In this study, necessary subgroup analyses of efficacy endpoint measures will be performed based on the following baseline data:

- Age: < 65 years, ≥ 65 years
- Sex: Male, female
- Baseline ECOG PS: 0, 1, 2
- Baseline Ann Arbor stage: Stage 1-3, Stage 4
- Baseline MIPI score: low risk (0-3 points), intermediate risk (4-5 points), high risk (6-11 points)
- Largest baseline lesion diameter: < 5 cm, ≥ 5 cm
- Baseline extranodal involvement: Yes, No
- Baseline bone marrow involvement: Yes, No
- Baseline gastrointestinal involvement: Yes, No
- MCL histology: classic/other, classic, blastoid, pleomorphic, other
- Number of lines of prior systemic anti-cancer therapy for MCL: ≤ 3 (1, 2, 3), > 3
- Reason for discontinuation of the last-line BTK inhibitor treatment for MCL: unacceptable toxicity, disease progression/relapse, completion of treatment course, non-response, other, unknown
- Prior exposure to proteasome inhibitors: Yes, No
- Prior exposure to immunomodulators: Yes, No
- Presence of TP53 gene abnormality: Yes, No, Not Tested/Unknown
- Ki-67-positive cell percentage≥ 30%: Yes, No, Unknown

Adequate data at each level of each of these subgroup factors shall be available to support a valid statistical analysis. If a subgroup factor has 2 levels and the number of subjects in either level is 0, the subgroup analysis will not be performed. If a subgroup factor has more than 2 levels and the number of subjects in any level is 0, the levels may be combined as appropriate before conducting subgroup analysis. If the number of subjects in any level of a subgroup factor is less than 10% of the total number of subjects in the analysis population, subgroup analysis for that factor may still be performed, but the results shall be interpreted with caution.

## General Data Processing

### Analysis Visit Window

Unless otherwise specified, no analysis window will be considered in this study. All summaries to be performed by visit will be based on the nominal visit collected directly in the eCRF. For by-visit summaries, data from scheduled visit time points will be included in tabular analysis. For analyses summarizing the worst-case post-baseline values (e.g., clinical significance evaluations of laboratory abnormalities during treatment), data from all scheduled and unscheduled visit time points shall be included simultaneously.

### Derivation of Efficacy Endpoints

#### **Best Overall Response (BOR)**

BOR can be classified as CR, PR, SD, PD, or NE according to the Lugano 2014 Response Criteria. The derivation of BOR will be based on all response assessments from the first dose of the study drug until the first observation of PD or initiation of new anti-cancer therapy, whichever occurs first, i.e., response assessments after initiation of new anti-cancer therapy will not be included in the derivation of BOR. Confirmation of BOR will be performed in the order of CR > PR > SD > PD > NE.

#### **Progression Free Survival (PFS)**

PFS is defined as the time from the date of the first dose of the study drug to disease progression or death, whichever occurs first. The formula is: PFS (months) = (date of event or censoring − date of first dose + 1)/30.4375.

The date of progression/censoring for PFS will be derived using the following rules:

- If the overall efficacy assessment result is PD, the date of progression will be the earliest date among all dates when PD was determined by the investigator and IRC in both CRF and IRC data, respectively.
- If the overall efficacy assessment is non-PD, the date shall be the latest date among the corresponding PET/CT exam date, measurable/non-measurable/new lesion assessment date, liver/spleen assessment date, bone marrow biopsy date, and endoscopy date.

In statistical analysis, subjects with no documented disease progression (assessed per the Lugano 2014 Response Criteria) and no death will be censored at the date of the last valid efficacy assessment. Detailed PFS events and censoring are described in Table 2 below:

Table 2 PFS Censoring Rules

| No. | Situation | Date of Analysis | Outcome |
| --- | --- | --- | --- |
| 1 | No valid baseline and/or post-baseline efficacy assessment. The subject was alive at the end of the study. | Date of first dose | Censored |
| 2 | No valid baseline and/or post-baseline efficacy assessment. The subject died within 115 days after the first dose. | Date of death | Event |
| 3 | No valid baseline and/or post-baseline efficacy assessment. The subject died after 115 days following the first dose. | Date of first dose | Censored |
| 4 | Post-baseline efficacy assessment was conducted. Neither PD nor death occurred by the end of the study, and no new anti-cancer therapy was received. | Date of last effective efficacy assessment | Censored |
| 5 | Post-baseline efficacy assessment was conducted. PD or death occurred after two or more consecutive missing visits. | Date of the last valid efficacy assessment prior to two or more consecutive missing visits (If the interval between the valid efficacy assessment and the first dose is >115 days, the first dose date shall be used as the analysis date) | Censored |
| 6 | New anti-cancer therapy was received prior to PD or death | Date of the last valid efficacy assessment prior to initiation of new anti-cancer therapy (If no valid post-baseline efficacy assessment exists, the date of the first dose shall be used as the analysis date) | Censored |
| 7 | PD during routine follow-up | PD date | Event |
| 8 | Death from any cause before PD during routine follow-up | Date of death | Event |

* Valid efficacy assessment: An efficacy assessment where the overall response evaluation at a visit (excluding baseline) is CR/PR/SD/PD. PD or death immediately after two consecutive missing efficacy assessments shall not be considered as PFS events. Efficacy assessments or death after the initiation of new anti-cancer therapy shall not be included in the derivation of PFS.

** Two or more consecutive missing visits/valid efficacy assessments are defined as the interval from the last adequate tumor assessment to PD or death exceeding 118 days [16 weeks + 6 days (2 efficacy assessment windows)]]. Two or more consecutive missing visits/valid efficacy assessments after the first dose are defined as the interval from the last adequate tumor assessment to PD or death exceeding 115 days [16 weeks + 3 days (1 efficacy assessment window)]].

*** Routine follow-up is defined as having baseline and post-baseline efficacy assessments during the study, without two or more consecutive missing visits and without initiation of new anti-cancer therapy.

#### **Duration of Response (DOR)**

DOR is defined as the time interval between the date of the first assessment of CR or PR to the first assessment of PD or death from any cause, whichever occurs first. The formula is: DOR (months) = (date of event or censoring − date of first disease remission + 1)/30.4375.

DOR will be calculated only for subjects with BOR of CR or PR. The censoring rules for DOR are consistent with those for PFS (refer to [Table 2](#表2)).

#### **Time to Response (TTR)**

TTR is defined as the time interval between the date of the first dose of the study drug to the first occurrence of disease remission (per the definition of ORR). The formula is: TTR (months) = (date of first disease remission − date of first dose + 1) / 30.4375, applicable only to subjects who achieve disease remission.

#### **Overall Survival (OS)**

Overall Survival (OS) is defined as the time from the first dose of the study drug to death from any cause. The formula is: OS (months) = (date of death or censored date − date of first dose + 1) / 30.4375. In statistical analysis, subjects with no documented death will be censored, with the cutoff date or last known date of survival as the censored date. The censoring rules are as follows:

- If a subject dies, death with a date on or before the data cutoff date will be considered an event, and death with a date after the data cutoff date will be censored at the data cutoff date.
- If subjects are alive (i.e., no date of death is documented), the subjects whose last known alive date is on or before the data cutoff date will be censored at the last known alive date; otherwise, the data cutoff date will be used as the censored date.

### Handling of Missing Values and Outliers

#### **Missing Value**

Unless otherwise specified, the handling of missing values described below is only applied to descriptive summaries in statistical tables/figures or data derivation; missing values will be displayed as such in data listings.

1. Adverse events and prior/concomitant medications and prior/concomitant non-drug therapies

For adverse events and cases where dates of prior/concomitant medications are partially missing (month and/or day missing), the following considerations will be applied to: determine whether an AE is a treatment-emergent adverse event (TEAE)), calculate the duration of adverse events of special interest (AESI), classify prior/concomitant medications as either prior or concomitant medications, and classify prior/concomitant non-drug therapies as either prior or concomitant non-drug therapies.

- If the start date of an adverse event is partially missing, the date of the first dose of the study drug will be used as the reference date:
- If the day is missing but the year and month match those of the reference date, the day will be estimated using the reference date;
- If the day is missing and the year and month do not match those of the reference date, the day will be estimated as the first day of that year and month;
- If the day and month are missing but the year matches that of the reference date, the day and month will be estimated using those of the reference date;
- If the month and day are missing and the year does not match that of the reference date, the month and day will be estimated as January 1st of that year.
- If the start date after imputation is later than the end date, the start date will be imputed with the end date.
- Partially missing start date of prior/concomitant medication:
- If the day is missing, it will be imputed as the first day of the corresponding month and year;
- If the month and day are missing, they will be imputed as January 1st of the corresponding year;
- Partially missing end date of prior/concomitant medication:
- If the day is missing, it will be imputed as the last day of the corresponding month and year;
- If the month and day are missing, they will be imputed as December 31 of the corresponding year;
- If the end date after imputation is later than the date of death, the end date will be imputed with the date of death.

The imputation rules for missing start/end dates of prior/concomitant non-drug therapies are the same as those for prior/concomitant medications. The imputation rules for missing end dates of adverse events are the same as those for prior/concomitant medications.

1. Date of death

The year and month of the death date shall not be unknown. The complete death date shall be obtained as far as possible. For individual subjects where the day is unknown, the following rules shall be used for imputation:

- If the year and month are the same as those of the subject's last known survival date, the date of death shall be imputed as the day immediately following the subject's last known survival date;
- If the year and month are different from those of the subject's last known survival date, the date of death shall be imputed as the 15th day of the month of death. If there is other evidence indicating that death occurred earlier than the 15th day of the month, it shall be imputed as the 1st day of that month. The imputed date of death shall be compared with the last known survival date. The maximum value between the imputed date of death and (last known survival date + 1 day) shall be taken as the final date of death.

1. Start date of new anti-cancer therapy

For the partially missing start date of new anti-cancer therapy (missing month and/or day), the later date between the treatment end date determined by the investigator and the date of radiological disease progression shall be used as the reference date, and the following rules shall be applied for imputation:

- If the day is missing and the year and month are the same as those of the reference date, then the day shall be imputed using the reference date;
- If the day is missing and the year and month do not match those of the reference date, the day will be estimated as the first day of that year and month;
- If the day and month are missing but the year matches that of the reference date, the day and month will be estimated using those of the reference date;
- If the month and day are missing and the year does not match that of the reference date, the month and day will be estimated as January 1st of that year.
- If the imputed start date is later than the end date, the start date shall be imputed as the end date;
- If the imputed start date is earlier than the reference date, the start date shall be imputed as the reference date.

1. Date of first MCL diagnosis

For partially missing dates of initial MCL diagnosis (missing month and/or day), the following rules shall be applied for imputation:

- If the day is missing, the “15th day” shall be used for imputation;
- If both the month and day are missing, “June 30th” shall be used for imputation.

1. Prior last-line BTK inhibitor therapy for MCL

To calculate the duration of the prior last-line BTK inhibitor therapy for MCL, the following rules will be used for imputation in cases of partially missing start/end dates:

- Partially missing start date:
- If the day is missing, it will be imputed as the first day of the corresponding month and year;
- If the month and day are missing, they will be imputed as January 1st of the corresponding year;
- Partially missing end date:
- If the day is missing, it will be imputed as the last day of the corresponding month and year;
- If the month and day are missing, they will be imputed as December 31 of the corresponding year;
- If the end date after imputation is later than the date of death, the end date will be imputed with the date of death.

1. Missing correlation between adverse event and study drug: shall be regarded as "related to the study drug" based on the conservative principle.
2. Missing CTCAE grade of adverse event: shall be regarded as Grade “≥3” and included in the calculation based on the conservative principle. If an adverse event is not of Grade 3 or higher, the highest CTCAE grade corresponding to the adverse event will be used for calculation.
3. Data handling for concentrations below the Lower Limit of Quantitation (LLOQ): For descriptive statistical summaries, plotting of mean plasma concentration-time profiles, and calculation of pharmacokinetic (PK) parameters, samples with concentrations below LLOQ shall be handled as follows: Samples taken prior to achieving Cmax are treated as zero, and samples taken after achieving Cmax are treated as missing. Values below LLOQ between two measurable concentrations are treated as missing. Any measurable concentrations appearing after a series of consecutive values below the LLOQ at the terminal phase of the concentration-time curve shall also be treated as missing.

#### **Outliers**

Unless otherwise specified, no testing or treatment shall be performed on any outliers.

### Unscheduled Safety Evaluation

Only one record is available for the scheduled visit inspections in this study. Unless otherwise specified, only records from scheduled visits will be included in the safety analysis by visit. Unscheduled measurements or inspection results will be included in the derivation of baseline values and the summary analysis of the worst post-baseline results. All scheduled and unscheduled records will be displayed in the subject listings.

### Derived Variables/Definitions

#### **Baseline**

Unless otherwise specified, baseline in this study is defined as the last valid measurement prior to the first dose of the study drug. If multiple measurements equidistant from the first dose of the study drug exist prior to the first dose, the measurement collected at the scheduled visit shall be preferentially used as the baseline.

#### **Change from Baseline**

Change from baseline is defined as the difference between the measured value and the baseline value. Percentage change from baseline is defined as the percentage ratio of the difference between the measured value and the baseline value to the baseline value. The calculation formulas are as follows:

• Change from baseline = post-baseline measurement-baseline value

• Percent change from baseline (%) = (post-baseline measurement-baseline value)/baseline value × 100%

#### **Study Day**

Unless otherwise specified, study day in this study is defined as the number of days relative to the start date of the study for efficacy and safety assessments/examinations. The date of the first dose of the study drug shall be the sole study start date of this study, and the study start date shall be recorded as Day 1. The study days are calculated as follows:

• If the assessment/examination is after the study start date, then study day = date of assessment/examination − study start date + 1

• If the assessment/examination is before the study start date, then study day = date of assessment/examination − study start date + 1

## Presentation of Statistical Summary and Analysis Results

All clinical trial data collected in this study will be provided in the form of subject listings. Unless otherwise specified, all subject data will be presented in listings by subject number, event/examination date/time.

In this study, unless otherwise specified, data will be summarized using descriptive statistics in accordance with the following general principles. For quantitative variables, descriptive statistics include number of subjects, mean, standard deviation, median, quartiles, minimum and maximum. For PK analysis, the coefficient of variation, geometric mean and geometric coefficient of variation will also be calculated. Qualitative/categorical variables are statistically described using frequency counts and relative frequencies, or numbers of subjects and percentages. The number of subjects in the relevant population will be used as the denominator for percentages, unless otherwise noted. Data used in general statistical tables will be presented in listings.

Decimal point presentation rules: Unless otherwise specified, the number of subjects shall be reported without decimal places. Percentages shall be rounded to one decimal place (no decimal places for 100, and percentages shall not be reported for a frequency of 0). Based on the precision of the original data, the decimal places of the minimum and maximum values shall be consistent with that of the original data. The mean, geometric mean, median, and quartiles shall retain one more decimal place than the original data, and the standard deviation shall retain two more decimal places. The coefficient of variation and geometric coefficient of variation shall be rounded to two decimal places. Concentration-related parameters (e.g., Cmax ss) shall retain the same precision as the original data. AUC-related parameters shall be reported with four significant digits or kept as the original values. Time-related parameters (e.g., Tmax ss andT1/2) shall be rounded to three significant digits. λz shall be reported with four decimal places. CLss/F and Vz/F shall be reported with four significant digits. DF shall also be reported with four significant digits. P-values shall be rounded to four decimal places. A p-value result less than 0.0001 will be recorded as < 0.0001 and a p-value result greater than 0.9999 will be recorded as > 0.9999. In principle, all statistical data shall have no more than four decimal places.

Statistical analyses are performed using SAS® statistical software (version 9.4).

# Statistical Analysis

## Study Subjects

### Subject Distribution

Based on the screened subjects, the number and percentage of subjects who were enrolled and participated in the study and those who failed screening, as well as the main reasons for screening failure, shall be summarized.

The number and percentage of subjects included in each analysis population (including FAS, mFAS, SS, PPS, PKS) and the reasons for exclusion from each analysis set shall be summarized separately for all enrolled subjects.

For all enrolled subjects, the number and proportion of subjects who received at least one dose of the study drug shall be summarized. In addition, the reasons for treatment discontinuation and the primary reasons for subject discontinuation from the study shall be summarized separately.

For the above summaries, a subject disposition flow chart shall be prepared.

Separate listings of subjects screened and enrolled, analysis populations, discontinued treatment evaluations, and discontinued subjects will be provided.

### Protocol Deviations

Protocol deviations will be classified into major deviations, important deviations, and minor deviations. During data review prior to database lock, the investigator, sponsor, and statistician will assess and agree on whether the protocol deviation is "minor", "important", or "major". Final protocol deviations will be tabulated in detail and documented prior to database lock.

The number and percentage of subjects with at least one major protocol deviation and the number and percentage of subjects with each major protocol deviation will be calculated based on the FAS.

The subject listings of all protocol deviations will be provided.

### Demographics and Baseline Characteristics

The following demographics and baseline characteristics are summarized descriptively for the FAS, mFAS, and PPS, respectively:

- Age (collected directly in CRF, years)
- Age category: < 65 years, ≥ 65 years
- Sex: Male, female
- Ethnicity: Han, other
- Baseline height (cm)
- Baseline height (kg)
- Baseline body mass index (BMI, kg/m2) = baseline weight (kg) / (baseline height (cm) / 100)2
- Baseline Eastern Cooperative Oncology Group (ECOG) PS: 0, 1, 2
- Duration of MCL (months) = (date of informed consent-date of first diagnosis of MCL +1)/30.4375, to 2 decimal places
- MCL histology: classical, blastic, polymorphic, other
- Type of any first-line systemic therapy prior to dosing: relapsed, refractory, unknown
- Type of last-line systemic therapy prior to dosing: relapsed, refractory, unknown
- Type of BTK inhibitor prior to dosing: relapsed, refractory, intolerant, unknown, other
- Number of lines of prior systemic anti-cancer therapy for MCL and categories (1, 2, 3, ≥ 4)
- Reason for discontinuation of the last-line BTK inhibitor therapy for MCL: unacceptable toxicity, disease progression/relapse, end of treatment cycle, other
- Best response assessment to the last-line BTK inhibitor therapy for MCL: Complete Response (CR), Partial Response (PR), Stable Disease (SD), Progressive Disease (PD), Unknown
- Duration of treatment of the last-line BTK inhibitor for MCL (months). If the start date/end date is missing, the duration will be calculated according to the rules in [Section 4.2.3](#_缺失值) after imputation, followed by adjustment for overlapping periods.
- Prior stem cell transplantation for MCL: Yes, No
- Prior CAR-T therapy for MCL: Yes, No
- Prior exposure to BTK inhibitors: Yes, No
- Prior exposure to BCL-2 inhibitors: Yes, No
- Prior exposure to PI3K inhibitors: Yes, No
- Prior exposure to proteasome inhibitors: Yes, No
- Prior exposure to immunomodulators: Yes, No
- Prior exposure to anti-CD20 antibody: Yes, No
- Baseline Ann Arbor stage: Stage 1, Stage 2, Stage 3, Stage 4, Unknown
- Baseline systemic symptoms: Group A, Group B (fever of unknown origin greater than 38 ° C, lasting more than 3 days/night sweats/weight loss of 10% or more in half a year), unknown
- Baseline IPI score: low risk (0-1 points), low-intermediate risk (2 points), high-intermediate risk (3 points), high risk (4-5 points), unknown
- Baseline MIPI score: low risk (0-3 points), intermediate risk (4-5 points), high risk (6-11 points), unknown
- Baseline lactate dehydrogenase (LDH) value/upper limit of normal value: < 0.67, ≥ 0.67 - < 1.00, ≥ 1.00 - < 1.50, ≥ 1.50
- Baseline LDH value: below lower limit of normal, normal, above upper limit of normal
- Presence of lesions ≥ 5 cm in long diameter at baseline: Yes, No
- Number of lesions ≥ 5 cm at baseline: 1, 2, ≥ 3
- Extranodal involvement at baseline: Yes, No
- Extranodal sites of involvement at baseline: bone, gastrointestinal tract, liver, spleen, other
- Presence of TP53 gene abnormality: Yes (mutation/deletion), No (normal), Not tested/unknown
- Ki-67-positive cell percentage ≥ 30%: Yes, No (If any Ki-67-positive cell percentage is ≥ 30% in the pathological test results of central laboratory and study site, it is Yes, otherwise it is No),

Subject listings of demographic and baseline characteristics, B symptom assessments, and MCL history-current diagnosis will be provided separately.

### Prior MCL-Related Therapies

Prior MCL-related therapies include stem cell transplantation, CAR-T therapy, surgery, systemic anti-cancer therapy, radiation therapy, and other therapies/procedures. The following summaries will be made:

- Subjects who have received MCL-related stem cell transplantation
- Number of transplantations: 1, 2, ≥3
- Type of last transplantation: allogeneic hematopoietic stem cell transplantation, autologous hematopoietic stem cell transplantation
- Best response at last transplantation: Complete Response (CR), Partial Response (PR), Stable Disease (SD), Progressive Disease (PD), Unknown
- Subjects who have previously received CAR-T therapy for MCL
- Number of treatments: 1, 2, ≥3
- Best response of last CAR-T therapy: Complete Response (CR), Partial Response (PR), Stable Disease (SD), Progressive Disease (PD), Unknown
- Subjects who have previously received systemic anti-cancer therapy for MCL
- Number of treatment lines and their categorized summary (1, 2, 3, ≥4)
- Treatment categories: BTK inhibitors, anti-CD20 monoclonal antibodies, BCL-2 inhibitors, PI3K inhibitors, proteasome inhibitors, immunomodulatory agents
- Number of BTK inhibitor treatment lines and their categorized summary (1, 2, ≥3)
- Types of BTK inhibitors and their categorized summary (1, 2, ≥3)
- Reasons for discontinuation of BTK inhibitor therapy: unacceptable toxicity, disease progression/relapse, completion of treatment course, no response, other, unknown
- Reason for discontinuation of last treatment: unacceptable toxicity, disease progression/relapse, completion of treatment course, no response, other, unknown
- Best response of last therapy: Complete Response (CR), Partial Response (PR), Stable Disease (SD), Progressive Disease (PD), Unknown

Subject listings of prior therapies related to MCL, including stem cell transplantation, CAR-T therapy, and systemic anti-cancer therapy, will be provided separately.

### Prior Non-MCL Medical History

Prior non-MCL medical history will be coded using the Medical Dictionary for Regulatory Activities (MedDRA) (Chinese version 26.0 or the latest version).

A listing of subjects with prior non-MCL medical history will be provided.

### Prior Non-MCL-related Surgical History

Prior non-MCL-related surgical history will be coded using MedDRA (Chinese version 26.0 or the latest version).

A subject listing of prior non-MCL-related surgical history will be provided.

### Prior/Concomitant Medication

Prior medications are defined as all medications discontinued before the first dose of the study drug.

Concomitant medications include all non-study drugs initiated before the first dose of the study drug and continued after the first dose, or initiated between the first dose of the study drug and 28 days after the last dose of the study drug or initiation of new anti-cancer therapy, whichever occurs first.

Prior/concomitant medications are coded using the World Health Organization dictionary WHODrug Global B3 Mar 1, 2023 or the latest version. The number and percentage of subjects with each type of prior/concomitant medications are also summarized by Anatomical Therapeutic Chemical 2 (ATC2) terms and preferred name (PN) based on SS. The same prior/concomitant medication occurring multiple times in the same subject (deemed identical if ATC2 level and preferred name (PN) are the same) will be counted only once under the corresponding category.

A subject listing of prior/concomitant medications will be provided.

### Prior/Concomitant Non-drug Therapies

Prior non-drug therapies are defined as all non-drug therapies that are ended before the first dose of the study drug.

Concomitant non-drug therapies include all non-study drugs initiated before the first dose of the study drug and continued after the first dose, or initiated between the first dose of the study drug and 28 days after the last dose of the study drug or initiation of new anti-cancer therapy, whichever occurs first.

Prior/concomitant non-drug therapies are coded using MedDRA (Chinese version 26.0 or the latest version). Meanwhile, based on the SS, the number and percentage of subjects with each type of prior/concomitant non-drug therapy will be summarized by System Organ Class (SOC) and Preferred Term (PT) separately. The same non-drug therapy (considered identical if SOC and PT are the same) occurring multiple times in the same subject will be counted only once under the corresponding category.

A subject listing of prior/concomitant non-drug therapies will be provided.

### Study Treatment Exposure and Compliance

The following will be summarized based on SS:

- Total number of treatment cycles received: Number of treatment cycles in which any non-zero dose of Rocbrutinib is administered
- Treatment time (days) = date of last dose of study drug-date of first dose of study drug + 1
- Total exposure (mg) = sum of (actual total dose taken per day (mg) * treatment duration (days)). Specifically, the actual daily total dose (mg) will be collected directly from the CRF. If a subject has multiple medication records, the total exposure in each medication record shall be calculated separately and then summed.
- Average daily dose (mg/day) = total exposure (mg)/duration of treatment (days)
- Relative dose intensity (%) = average daily dose (mg/day)/150 (mg/day) * 100%
- Relative Dose Intensity Category
- <80%, 80% - 120%, >120%
- Compliance (%) = total exposure (mg)/total planned exposure (mg) * 100%. Specifically, the total planned exposure (mg) is the total amount of exposure that the subject should have received during the given treatment time. Dose modification due to AEs will be considered compliance with the investigator's instructions. The total planned exposure (mg) = total planned exposure per day (mg/day) * planned treatment duration (days) will be defined as follows:
- Total planned exposure per day (mg/day):

1. No dose modification: 150 (mg/day)
2. Investigator-recommended modification (reason for dose modification is AE): modified planned dose (planned dose as recorded in CRF Reason for Dose Modification)
3. Overdose/underdose/missed dose by subject (dose modification not due to AE): Handle as per 1)

- Planned treatment duration (days):

1. If the investigator does not recommend dose interruption or permanent discontinuation of the study drug: planned treatment duration (days) = actual treatment duration (days)
2. If the investigator recommends permanent discontinuation of the study drug: The incomplete portion of the treatment cycle resulting from permanent discontinuation shall not be included in the calculation of planned treatment duration (days).
3. If the investigator recommends dose interruption of the study drug (reason for dose interruption is AE) with subsequent resumption of treatment: planned treatment duration (days) = treatment duration before dose interruption (days) + treatment duration after resumption (days).
4. Subject self-discontinuation or dose interruption (not due to AE): Handle as per 1).

- Compliance classification: < 80%, 80%-120%, > 120%
- Dose modification: Yes, No
- Type of dose modification: dose reduction, dose interruption, other
- Reason for dose modification: adverse event, missed dose, other

Lists of subjects by study drug use will be provided separately.

## Efficacy Analysis

### Hypothesis Testing and Multiplicity Considerations

This study uses a single-group target value design to evaluate whether the IRC-assessed ORR (π) of Rocbrutinib monotherapy in subjects with relapsed or refractory mantle cell lymphoma (R/R MCL) is superior to the set target value (π0). The statistical hypotheses are as follows:

Null hypothesis H0: π ≤ π0

Alternative hypothesis H1: π > π0

These hypotheses will be tested using either an exact test of the single-group target value (significance level α = 0.025 one-sided) or a confidence interval approach. If p < 0.025 for the exact test of the single-group target value, or the lower limit of the 95% two-sided confidence interval (CI) of the ORR in this study is > target value (π0), H0 will be rejected and the IRC-assessed ORR (π) of Rocbrutinib monotherapy in R/R MCL subjects will be considered superior to the set target value (π0). There are no multiplicity issues with this test.

### Primary Estimand Analysis

The primary efficacy endpoint of this study is the Overall Response Rate (ORR) assessed by the Independent Review Committee (IRC) according to the Lugano 2014 Response Criteria. ORR is defined as the proportion of subjects achieving a best overall response of CR or PR.

#### **Primary Estimands**

Clinical question of interest: To evaluate whether the overall response rate (ORR) to Rocbrutinib monotherapy in patients with relapsed or refractory mantle cell lymphoma (R/R MCL) is significantly higher than the response rate achieved in current clinical practice. The primary estimands are defined as follows:

- Population: Patients with histologically confirmed relapsed/refractory (R/R) mantle cell lymphoma (MCL) by central laboratory, who have received at least one dose of Rocbrutinib. The primary analysis populations are the FAS and mFAS.
- Treatment: Rocbrutinib 150 mg orally once daily, administered outside the time window of 1 hour before and 2 hours after meals. Each treatment cycle is 28 days, with continuous dosing until disease progression, unacceptable toxicity, or other criteria for treatment discontinuation are met. Best supportive care is allowed during this period, but concomitant use of anti-cancer therapy and drugs that significantly inhibit or induce the absorptive and metabolic processes of Rocbrutinib is not allowed.
- Variable: Best overall response (CR/PR/SD/PD) assessed by IRC based on the Lugano 2014 Response Criteria for Non-Hodgkin Lymphoma (NHL).
- Concurrent events and management strategies:

| **Intercurrent Event** | **Management Strategy** | **Consideration or Explanation** |
| --- | --- | --- |
| Premature termination of treatment | Treatment policy strategy | Efficacy responses prior to initiation of next line therapy are considered to be related to Rocbrutinib, even if treatment is terminated early. |
| Supportive care | Treatment policy strategy | Supportive care is part of the study treatment regimen and is consistent with clinical practice. |
| Concomitant administration of strong or moderate CYP3A inhibitors or inducers, sensitive substrates of OATP1B1/OATP1B3, H2-receptor antagonists, and proton pump inhibitors. | Treatment policy strategy | Short-term use has a limited impact on the assessment of treatment response. |
| Concomitant/initiation of new anti-cancer therapy | While on treatment strategy | Efficacy outcome after the initiation of new anti-cancer therapy is not related to Rocbrutinib |

- Population level summary: Overall response rate (ORR) and its 95% confidence interval (CI) will be calculated for the target population. ORR is defined as the percentage of the target population with a best response of CR/PR.

#### **Primary Estimate Analysis**

The overall response rate (ORR) and its two-sided exact 95% confidence interval (CI) based on the binomial distribution using the Clopper-Pearson method will be calculated.

SAS program example:

/***********************************

ORR = overall response rate as assessed by IRC

*************************************/

**proc** **freq** data=ADEFF noprint;

tables ORR / exact binomial (p= **0.3** level=**2** cl=exact);

**run**;

#### **Supplementary Analysis**

To assess the robustness of the primary analysis, the ORR assessed by IRC and its two-sided exact 95% CI based on the binomial distribution using the Clopper-Pearson method are calculated for the PPS analysis set.

In addition, swim plots of subject treatment duration and efficacy assessments at each visit will be generated based on FAS and mFAS. Waterfall plots will be generated based on the best percentage change in the sum of the product of perpendicular diameters (SPD) relative to baseline and the best overall response.

#### **Subgroup Analysis**

According to the subgroups defined in [Section 4.5](#_亚组分析), forest plots will be generated for subjects at each level of the subgroup factors, using the FAS and mFAS as the analysis populations respectively. The plots will present the overall response rate (ORR) assessed by IRC and its two-sided exact 95% CI based on the binomial distribution using the Clopper-Pearson method, to demonstrate the consistency of efficacy results at different levels of subgroup factors with the primary estimate analysis.

### Secondary Efficacy Analysis

The secondary efficacy endpoints of this study include the investigator-assessed ORR, IRC- and investigator-assessed PFS, DOR, and TTR, as well as OS. All analyses of secondary efficacy endpoints will be based on the FAS, mFAS, and PPS, respectively.

#### **Investigator-assessed ORR and CR**

For investigator-assessed ORR, the same analytical method as that used for the primary efficacy endpoint will be used. For efficacy outcomes assessed by the IRC/investigator, the number and percentage of subjects achieving BOR of CR/PR/SD/PD will be calculated separately.

In addition, a consistency analysis will be conducted for ORR as assessed by the IRC and investigator, with calculation of the concordance rate and kappa value.

#### **Progression Free Survival (PFS)**

Based on the assessments by IRC and investigators, the number and percentage of subjects with PFS events (PD or death) and censored subjects will be calculated. The median, Q1, and Q3 of PFS will be estimated using the Kaplan‑Meier (KM) method, with 95% CIs calculated according to the Brookmeyer and Crowley method. The progression-free survival rate at different time points (including but not limited to 6 months, 12 months, 18 months, and 24 months) and its 95% CI based on the Greenwood formula will also be calculated. The KM curve for PFS will be plotted. If the data do not allow a valid KM analysis, simple descriptive statistics will be used instead.

The median PFS follow-up time and its 2-sided 95% CI will be calculated using the Reverse Kaplan-Meier method, and the PFS follow-up time and its 2-sided 95% CI at Q1 and Q3 will be provided. The definition of PFS follow-up time is the inverse of PFS: events in the PFS analysis are treated as censored in the PFS follow-up time analysis, and censored observations in the PFS analysis are regarded as events in the PFS follow-up time analysis.

#### **Duration of Response (DOR)**

Based on the results assessed by IRC and investigators, the number and percentage of subjects with DOR events (PD or death) and censored subjects will be calculated. The median, Q1, and Q3 of DOR will be estimated using the Kaplan‑Meier (KM) method, together with the 95% CI calculated by the Brookmeyer and Crowley method. The sustained response rate at different time points (including but not limited to 6 months, 12 months, 18 months, and 24 months) and its 95% CI based on Greenwood's formula will also be calculated. The KM curve for DOR will be plotted. If the data do not allow a valid KM analysis, simple descriptive statistics will be used instead.

The median follow-up time for DOR and its 2-sided 95% CI will be calculated using the Reverse Kaplan-Meier method, and the follow-up time for DOR at Q1 and Q3 and its 2-sided 95% CI will be provided. The definition of DOR follow-up time is the inverse of DOR: events in the DOR analysis are treated as censored in the DOR follow-up time analysis, and censored observations in the DOR analysis are regarded as events in the DOR follow-up time analysis.

#### **Time to Response (TTR)**

TTR will also be summarized descriptively for subjects with ORR based on IRC and investigator assessments.

#### **Overall Survival (OS)**

The number and percentage of subjects with OS events and censored subjects will be calculated. The median, Q1, and Q3 of OS will be estimated using the Kaplan‑Meier (KM) method, together with the 95% CI calculated by the Brookmeyer and Crowley method. The survival rate at different time points (including but not limited to 12 months, 18 months, and 24 months) and its 95% CI based on the Greenwood's formula will also be calculated, and the KM curve of OS will be plotted.

The median OS follow-up time and its 2-sided 95% CI will be calculated using the Reverse Kaplan-Meier method, and the OS follow-up time and its 2-sided 95% CI at Q1 and Q3 will be provided. The definition of OS follow-up time is the inverse of OS: events in the OS analysis are treated as censored in the OS follow-up time analysis, and censored observations in the OS analysis are regarded as events in the OS follow-up time analysis.

## Safety Analysis

The safety analyses in this study will be based on SS.

### Adverse Events

AEs shall be coded in accordance with MedDRA (Chinese version 26.0 or the latest version), and graded for severity using the National Cancer Institute Common Terminology Criteria for Adverse Events Version 5.0 (NCI CTCAE v5.0).

Analysis of AEs will be based on treatment-emergent adverse events (TEAE), defined as adverse events that occur or worsen from the first dose of the study drug up to 28 days after the last dose of the study drug or prior to the initiation of new anti-cancer therapy, whichever comes first.

According to the criteria for judging the relationship between AEs and the study drug specified in the protocol, TEAEs related to the study drug include those with missing relationship to the study drug, or those judged as "definitely related", "probably related" and "possibly related".

A summary table will be generated to summarize the number of TEAEs, number of subjects, and percentage in the following categories by CTCAE grade (Grade 1, Grade 2, Grade 3, Grade 4, Grade 5, Grade ≥3, Total):

- TEAE
- SAE
- AESI
- Leading to dose reduction
- Leading to dose interruption
- Leading to treatment discontinuation
- Leading to death
- TEAEs related to study drug
- SAE
- AESI
- Leading to dose reduction
- Leading to dose interruption
- Leading to treatment discontinuation
- Leading to death

In addition, the number of events, number of subjects, and percentage of subjects with TEAEs in the following categories will be summarized in separate summary tables, classified by SOC/AESI (see [Appendix 1](#_附录) for detailed classification), PT and/or CTCAE grade (Grade 1, Grade 2, Grade 3, Grade 4, Grade 5, ≥ Grade 3, Total):

- TEAEs, by SOC, PT and CTCAE grade
- TRAEs, by SOC, PT and CTCAE grade
- AESIs, by AESI category, PT, and CTCAE grade
- SAE, by SOC and PT
- SAEs related to study drug, by SOC and PT
- AESIs related to study drug, by SOC and PT
- TEAEs leading to dose reduction, by SOC and PT
- TRAEs leading to dose reduction, by SOC and PT
- TEAEs leading to dose interruption, by SOC and PT
- TRAEs leading to dose interruption, by SOC and PT
- TEAEs leading to treatment discontinuation, by SOC and PT
- TRAEs leading to treatment discontinuation, by SOC and PT
- TEAEs leading to death, by SOC and PT
- TRAEs leading to death, by SOC and PT

In the above TEAE summary tables, the number and percentage of subjects with at least one occurrence of the respective TEAE will be analyzed. For the same subject, multiple occurrences of an identical TEAE (i.e., same System Organ Class and Preferred Term) shall be counted once under the corresponding System Organ Class and Preferred Term for subject count, while episode counts shall be tallied according to the number of occurrences. If the same subject has multiple CTCAE grades for the same TEAE, the maximum CTCAE grade will be used for subject-level analysis, while episode counts will be tallied separately according to the number of occurrences at each grade.

Based on actual data, for the same subject, if new adverse events are recorded in the CRF due to changes in the severity of an adverse event, and these adverse events share the same SOC and PT, are chronologically contiguous (i.e., the start date of the subsequent AE minus the end date of the preceding AE = 0 or 1 day), and the outcome of the preceding AE is documented as “not recovered/not resolved”, then these AE records shall be considered as the same AE. If these records are judged to be the same AE, only one episode shall be recorded for these consecutive multiple AE entries in the tabular analysis. The following shall be included based on the most severe condition: CTCAE grade (the maximum CTCAE grade as the most severe); whether it is an SAE (“Yes” as the most severe); causality to the study drug (related to the study drug as the most severe); action taken with the study drug (in descending order of severity: permanent discontinuation/dose reduction/dose interruption/no dose change/not applicable/unknown). The outcome shall be included based on the final outcome for analysis. All pre-combination AE records collected in the CRF will be retained in the AE subject listing.

For each category of AESI related to the study drug, the time to the first occurrence of AESI related to the study drug will be calculated and summarized using descriptive statistical methods for quantitative indicators. The time to the first occurrence of study drug‑related AESI is defined as the time from the first dose administration to the first occurrence of study drug‑related AESI. The time to the first occurrence of the study drug‑related AESI is calculated as: (date of first study drug‑related AESI – date of first dose + 1) / 30.4375 in months. If the same subject experiences multiple identical study drug-related AESIs, the shortest time to the first occurrence of the study drug-related AESI for that subject will be used in the analysis. The duration of AESI related to the study drug will be calculated using the Kaplan‑Meier method, with the median, its 95% confidence interval, and the first (Q1) and third (Q3) quartiles provided. The duration of AESI related to the study drug is defined as the interval from the start date to the end date of the AESI associated with the study drug. The formula for calculating the duration of AESI related to the study drug is (end date of AESI related to the study drug or censored date − start date of AESI related to the study drug + 1) / 30.4375 in months. If the same subject experiences multiple identical AESIs related to the study drug, the total duration shall be the sum of the durations of each such AESI, excluding overlapping periods. If a subject has an ongoing AESI related to the study drug, the end date will be censored at the subject's death, 28 days after the last dose, or the data cutoff date, whichever occurs first. The above analysis shall be repeated for AESIs related to the study drug with CTCAE Grade ≥ 3. Subject numbers and percentages will also be summarized by outcome for AESIs related to the study drug and for AESIs related to the study drug with CTCAE Grade ≥ 3.

Only TEAEs will be pooled and analyzed, and all AEs will be presented in data listings. The following subject listings will be provided: AEs, AEs related to the study drug, SAEs, AESIs, AEs resulting in dose reduction of the study drug, AEs resulting in dose interruption of the study drug, AEs resulting in permanent discontinuation of the study drug, and AEs leading to death.

### Laboratory Tests

The laboratory test items in this study include hematology, blood biochemistry, coagulation function, urinalysis, stool routine + occult blood.

The laboratory test items, including hematology, blood biochemistry and coagulation, will be analyzed as follows:

- Descriptive statistics will be used to summarize the actual values and changes from baseline of laboratory test results at each analysis visit.
- For laboratory parameters that can be graded for toxicity using NCI CTCAE 5.0, the changes from baseline to the maximum post-baseline CTCAE grade will be summarized in a cross-tabulation.
- A cross-tabulation will be used to summarize the number and percentage of subjects in the investigator-determined clinical outcome assessment categories ("normal", "abnormal, not clinically significant", and "abnormal, clinically significant") for changes from baseline to the worst post-baseline result for each examination item.

In addition, to evaluate potential drug-induced liver injury (DILI), the following categories for the evaluation of potential drug-induced liver injury (eDISH) will be summarized based on Hy’s law:

Table 3 Evaluation of potential drug-induced liver injury

| **Parameters** | **Classification** |
| --- | --- |
| ALT | > 3-5 × ULN if baseline value is normal; > 3-5 × baseline if baseline value is abnormal |
| > 5-20 × ULN if baseline value is normal; > 5-20 × baseline if baseline value is abnormal |
| > 20 × ULN if baseline value is normal; > 20 × baseline if baseline value is abnormal |
| AST | > 3-5 × ULN if baseline value is normal; > 3-5 × baseline if baseline value is abnormal |
| > 5-20 × ULN if baseline value is normal; > 5-20 × baseline if baseline value is abnormal |
| > 20 × ULN if baseline value is normal; > 20 × baseline if baseline value is abnormal |
| TBIL | > 1.5-3 × ULN if baseline value is normal; > 1.5-3 × baseline if baseline value is abnormal |
| > 3-10 × ULN if baseline value is normal; > 3-10 × baseline if baseline value is abnormal |
| > 10 × ULN if baseline value is normal; > 10 × baseline if baseline value is abnormal |
| ALT and/or AST and TBIL and ALP | ALT and/or AST > 3 × ULN and TBIL > 2 × ULN and ALP < 2 × ULN |

All laboratory test results for individual subjects will be presented in data listings by visit, and values outside the normal range (using "H" and "L" if normal ranges are provided) and clinically significant abnormalities (using "normal", "abnormal, not clinically significant" and "abnormal, clinically significant") will be flagged in the listings.

For measurements containing mathematical notations, such as "< 1.005", the values without mathematical notations will be included in the summary tables and the raw data with mathematical notations will be presented in the data listings.

In addition to the above-listed tests, blood immunoglobulin quantification, viral testing, HBV-DNA test, HCV-RNA test and pregnancy test will also be performed for the subjects, and corresponding subject listings will be provided respectively.

### Vital Signs and Weight

The vital signs measured in this study include sitting pulse, blood pressure, respiration, and body temperature. The examination results collected also include clinical assessment ("normal", "abnormal, not clinically significant", and "abnormal, clinically significant") and abnormal description of each vital sign examination item as judged by the investigator.

The following analyses will be performed by examination item:

- Descriptive statistics will be used to summarize the actual measured values of vital signs and body weight at each analysis visit;
- A cross-tabulation will be used to summarize the number and percentage of subjects in the investigator-determined clinical outcome assessment categories of vital signs ("normal", "abnormal, not clinically significant", and "abnormal, clinically significant") for changes from baseline to the worst post-baseline result for each examination item.

The subject listing of vital signs and weight will be provided.

### 12-lead ECG

ECG parameters measured in this study include: pulse (beats/min), PR (ms), RR (ms), QRS (ms), QT (ms), and QTcF (ms). The examination results collected also include an assessment of the ECG clinical findings ("normal", "abnormal, not clinically significant", and "abnormal, clinically significant") at the visit as judged by the investigator and a report conclusion.

The following analyses will be performed:

- For QTcF (ms), descriptive statistics will be used for the actual values and the changes from baseline, by analysis visit.
- A cross-tabulation will be used to summarize the number and percentage of subjects in the investigator-determined clinical outcome assessment categories ("normal", "abnormal, not clinically significant", and "abnormal, clinically significant") for changes from baseline to the worst post-baseline result.
- Based on subjects with both pre- and post-baseline ECG data, the maximum QTcF results after dosing meeting the following conditions are summarized:

Maximum measured QTcF value

- ≤ 450 ms
- 450 - ≤ 480 ms
- 480 - ≤ 500 ms
- > 500 ms

Maximum QTcF change from baseline

- ≤ 30 ms
- 30 - ≤ 60 ms
- > 60 ms

For visits with three repeated measurements, the mean value of the three measurements will be used as the analysis value for that visit and included in the analysis, in the summary tables of measured ECG parameters and changes from baseline. In the cross-tabulation of worst clinical significance relative to baseline in post-baseline ECG assessments, if the visit is the baseline visit, the worst result among the three measurements will be taken as the baseline clinical significance for analysis; If the visit is a post-baseline visit, the worst result among the three measurements will be taken as the clinical significance for that post-baseline visit and included in the analysis.

Subject listings of 12-lead ECGs will be provided. A subject list for 12-lead ECG with abnormal results (abnormal with clinical significance) will also be provided separately.

### Physical Examination

The physical examination items in this study include: skin, eyes, ears, nose, throat, oral cavity, Waldeyer's ring, lungs, heart, abdomen, limbs, musculoskeletal system, nervous system, thyroid, superficial lymphatic system, general appearance and others. The examination results collected are the clinical assessment ("normal", "abnormal, not clinically significant", and "abnormal, clinically significant") and the description of the abnormality as judged by the investigator.

The subject listings of the physical examination will be provided. Subject listings of physical examinations with abnormal findings (clinically significant is “abnormal, clinically significant”) will also be provided separately.

### ECOG PS

Descriptive statistics will be used to summarize the number and percentage of subjects by ECOG PS at baseline (0, 1, 2) and at each post-baseline visit (0, 1, 2, 3, 4, 5), and a cross-tabulation will be provided for the worst post-baseline result of ECOG PS from baseline.

The subject listings of ECOG PS will be provided.

### Death

The number and proportion of deceased subjects will be summarized and tabulated by cause of death. Data will also be summarized by time of death (occurring after the first dose and within 28 days of the last dose vs. occurring more than 28 days after the last dose) and cause of death.

Death information will be included in the subject listings.

## Quality of Life (QoL) Assessment

The quality of life of subjects in this study will be assessed using the EORTC QLQ-C30.

The EORTC QLQ-C30 scale will be divided into corresponding domains according to the following table, and the scores of each domain will be calculated separately (Raw Score, RS). The raw scores for each domain will be transformed into Standard Scores according to the following formula.

- Functional domain: standard score = [1-(RS-1)/R] × 100
- Symptom domain and global health status domain: SS = [(RS-1)/R] × 100

Table 4 Scoring Method for Each Domain of QLQ-C30 (Raw Score RS)

| **Domain (Dimension)** | **Code** | **Attribute** | **Number of Items** | **Score Range (R)** | **Scoring Method** |
| --- | --- | --- | --- | --- | --- |
| Physical functioning | PF | Functional | 5 | 3 | (Q1+Q2+Q3+Q4+Q5)/5 |
| Role function | RF | Functional | 2 | 3 | (Q6+Q7)/2 |
| Emotional function | EF | Functional | 4 | 3 | (Q21+Q22+Q23+Q24)/4 |
| Cognitive function | CF | Functional | 2 | 3 | (Q20+Q25)/2 |
| Social function | SF | Functional | 2 | 3 | (Q26+Q27)/2 |
| General health status | QL |  | 2 | 6 | (Q29+Q30)/2 |
| Fatigue | FA | Symptom | 3 | 3 | (Q10+Q12+Q18)/3 |
| Nausea and vomiting | NV | Symptom | 2 | 3 | (Q14+Q15)/2 |
| Pain | PA | Symptom | 2 | 3 | (Q9+Q19)/2 |
| Dyspnea | DY | Symptom | 1 | 3 | Q8 |
| Insomnia | SL | Symptom | 1 | 3 | Q11 |
| Appetite loss | AP | Symptom | 1 | 3 | Q13 |
| Constipation | CO | Symptom | 1 | 3 | Q16 |
| Diarrhoea | DI | Symptom | 1 | 3 | Q17 |
| Financial difficulties | FI | Symptom | 1 | 3 | Q28 |

If any item has missing values, the analysis will be performed in accordance with the following principles:

- For domains with multiple items:
- If there are 1/2 items answered, use the answered items to calculate the domain score. For example, for the emotional functioning domain, RS is calculated as RS = (Q21 + Q22 + Q23 + Q24)/4 when no data are missing. If only the score for Q23 is missing, RS = (Q21 + Q22 + Q24)/3.
- If the number of answered items is < 1/2 of the number of items in the domain, the domain score is set to missing.
- For single-item domains, no imputation will be performed if the score is missing.

For the EORTC QLQ-C30 scale, the standardized scores at each scheduled visit and the standardized scores of change from baseline will be analyzed with descriptive statistics for each domain.

## Pharmacokinetic Analysis

The pharmacokinetic analysis in this study will be based on PKS.

### PK Concentration

Descriptive statistical analysis and tabular presentation of plasma concentration data will be performed by scheduled blood sampling time point. Descriptive statistics will be performed only if at least two-thirds of the individual data meet or exceed the LLOQ at a given sampling time point. When a subject's sampling time is outside the time window, the subject's concentration at the time point beyond the time window is still listed, but not included in the statistical analysis. For the mean plot, the planned sampling time points are used; for the individual plot, the actual sampling time points are used.

To investigate changes in plasma concentrations over time, the following linear and semi-logarithmic scale plots will be generated:

- Plot of mean (+ standard deviation) plasma concentrations over scheduled sampling time
- Plot of individual plasma concentrations over actual sampling time

All PK concentration data will be included in subject listings.

### PK Parameters

Non-compartmental pharmacokinetic parameters will be estimated and analyzed using WinNonlin 8.4 or higher versions. The pharmacokinetic parameters of continuous administration periods are shown in the table below:

Table 5 PK Parameters

| PK parameters | Unit | Definition or calculation formula |
| --- | --- | --- |
| AUC0~t ss | ng*h /mL | Area under the plasma concentration-time curve from time 0 to the time of the last measurable concentration. |
| Tmax ss | h | Time to peak at steady state |
| λz | 1/h | Elimination rate constant of plasma drug concentration in the terminal elimination phase |
| T1/2 | h | Elimination phase half-life, T1/2=Ln(2)/λz |
| AUCτ | ng*h /mL | Area under the plasma concentration-time curve from time 0 to τ hours, where τ is the dosing interval, AUC(i,i+1)=((t(i+1)-ti)×(Ci+C(i+1)))⁄2, t=τ, (i) is the ith time point |
| AUC0~t ss | ng*h /mL | Area under the plasma concentration time curve from time 0 to infinity,  AUC0~ ss=AUC0~t,ss+Ct/λz., Ct is the plasma concentration at the time of the last measurable concentration, and λz is the elimination rate constant of the plasma concentration in the terminal phase |
| AUC_%Extrap | % | AUC_%Extrap=(AUC0~ ss-AUC0~t ss)/AUC0~t ss×100% |
| CLss/F | L/h | Apparent clearance, CLss/F =DOSE/AUCτ |
| Vz/F | L | Apparent volume of distribution, Vz/F = DOSE/(AUCτ×λz) |
| Cmin ss | ng/mL | Minimum concentration at steady state |
| Cmax ss | ng /mL | Maximum concentration at steady state |
| Cav ss | ng/mL | Average plasma concentration at steady state, Cav ss= AUCτ/τ |
| DF | % | Fluctuation coefficient, DF=(Cmax ss-Cmin ss)/Cav ss×100 |
| R2_adjusted |  | Best-fit coefficient |

Descriptive statistics will be performed on PK parameter results, and all PK parameter results will be included in subject listings. λz is calculated using linear regression in NCA with WinNonlin. If the estimated λz is considered potentially inaccurate under any of the following conditions, it will be flagged in the parameter listings. PK parameters (AUC₀–∞, ss, T½, Vz/F, AUC_%Extrap) dependent on λz will still be listed but not subjected to descriptive statistics.

- Fewer than 3 PK samples after the peak concentration are used for the calculation of λz.
- AUC_%Extrap >20%
- R2_adjusted <0.8

# Interim Analysis

No interim analysis is planned in this study.

# Changes from Protocol-Specified Statistical Methods

The analysis population for the modified full analysis set (mFAS) was added, and the baseline and efficacy analyses for this population were added as needed. According to previous literature reports (see Table 6 below for details), the time to response (TTR) of BTK inhibitors in patients with R/R MCL is approximately 2 months, with the earliest being 0.8 months. The mFAS excludes from the FAS those subjects who received less than 14 days of treatment (based on TTR data for similar agents, it is conservatively estimated that even if subjects respond to Rocbrutinib subsequently, they will not have met the response criteria by day 14 of treatment, and the drug may not have taken effect yet) and discontinued treatment early for reasons other than insufficient efficacy (e.g., poor subject compliance) without post‑treatment efficacy assessments. However, the mFAS still includes subjects with a clear trend of progression as assessed by the investigator.

Table 6 Time to Response (TTR) with BTK Inhibitor Treatment in R/R MCL

| BTK inhibitor | Study population | Median TTR (range) months | References |
| --- | --- | --- | --- |
| Ibrutinib | R/R MCL | 1.9 (1.4-13.7) | N Engl J Med. 2013 Aug 8; 369(6):507-16. |
| Zanubrutinib | R/R MCL | 2.7 (2.5-16.6) | Clin Cancer Res. 2020 Aug 15; 26(16):4216-4224. |
| Zanubrutinib | R/R MCL | 2.7 (2.5-3.0) | Blood. 2022 May 26; 139(21):3148-3158. |
| Acalabrutinib | R/R MCL | 1.9 (1.8-3.7) | Lancet. 2018 Feb 17; 391(10121):659-667. |
| Pirtobrutinib | R/R MCL | 1.8 (0.8-4.2) | Curr Med Chem. 2023 Oct 10. |

# List of Statistical Tables, Figures and Listings

Templates for statistical tables, figures, and listings, as well as some instructions for statistical programming for planned analyses, will be discussed in detail in separate documents.

# Appendices

Appendix I AE Classification and Consolidated PT Rules

Table 7 Classification Rules for Adverse Events of Special Interest

| AESI Classification | Grouped PT/PT |
| --- | --- |
| Hemorrhage | Petechiae, ecchymosis, subcutaneous haemorrhage, haematuria*, gastrointestinal haemorrhage, epistaxis, conjunctival haemorrhage |
| Infection | Pneumonia*, upper respiratory tract infection*, urinary tract infection*, herpes viral infection*, hepatitis B*, conjunctivitis, oral infection, gingivitis, sepsis, scrub typhus, encephalitis bacterial, strongyloidiasis, vascular device infection, Epstein-Barr virus infection, neck abscess, furuncle |
| Hematocytopenia | Neutrophil count decreased, platelet count decreased, anaemia |
| Hepatic function abnormal | Aspartate aminotransferase increased, alanine aminotransferase increased, blood bilirubin increased*, blood alkaline phosphatase increased, liver function test abnormal, gamma-glutamyltransferase increased |
| Arrhythmia | Electrocardiogram QT prolonged, arrhythmia, sinus arrhythmia, bundle branch block right, atrial flutter#, atrial fibrillation# |
| Second primary malignancy# | All PTs of various malignancies |
| Gastrointestinal toxicity | Vomiting, nausea, diarrhoea, constipation, decreased appetite, abdominal pain* |
| Hypertension | Hypertension* |

* Combination of multiple PT terms (see[Table 8](#表8) below).

# The option also needs to be retained when the occurrence rate is 0%.

Table 8 Grouped PT Rules

| Grouped PTs | PT |
| --- | --- |
| Haematuria | Haematuria, urinary occult blood positive |
| Pneumonia | Pneumonia, pneumonia viral, COVID-19 pneumonia |
| Upper respiratory tract infection | Upper respiratory tract infection, influenza, nasopharyngitis, sinusitis, pharyngotonsillitis |
| Urinary tract infection | Urinary tract infection, cystitis |
| Herpes virus infection | Herpes viral infection, oral herpes, herpes zoster |
| Hepatitis B | Hepatitis B reactivation, hepatitis B DNA test positive |
| Blood bilirubin increased | Blood bilirubin increased, bilirubin conjugated increased |
| Abdominal pain | Abdominal pain, abdominal pain upper |
| Hypertension | Hypertension, blood pressure increased |
| Haematuria | Haematuria, urinary occult blood positive |
