# Supplementary material
Source: Research Square preprint supplement (doi:10.21203/rs.3.rs-9538133/v1)
Supplement: Supplementary file 3 [file cae79bdf827a5c97048411fe.docx]

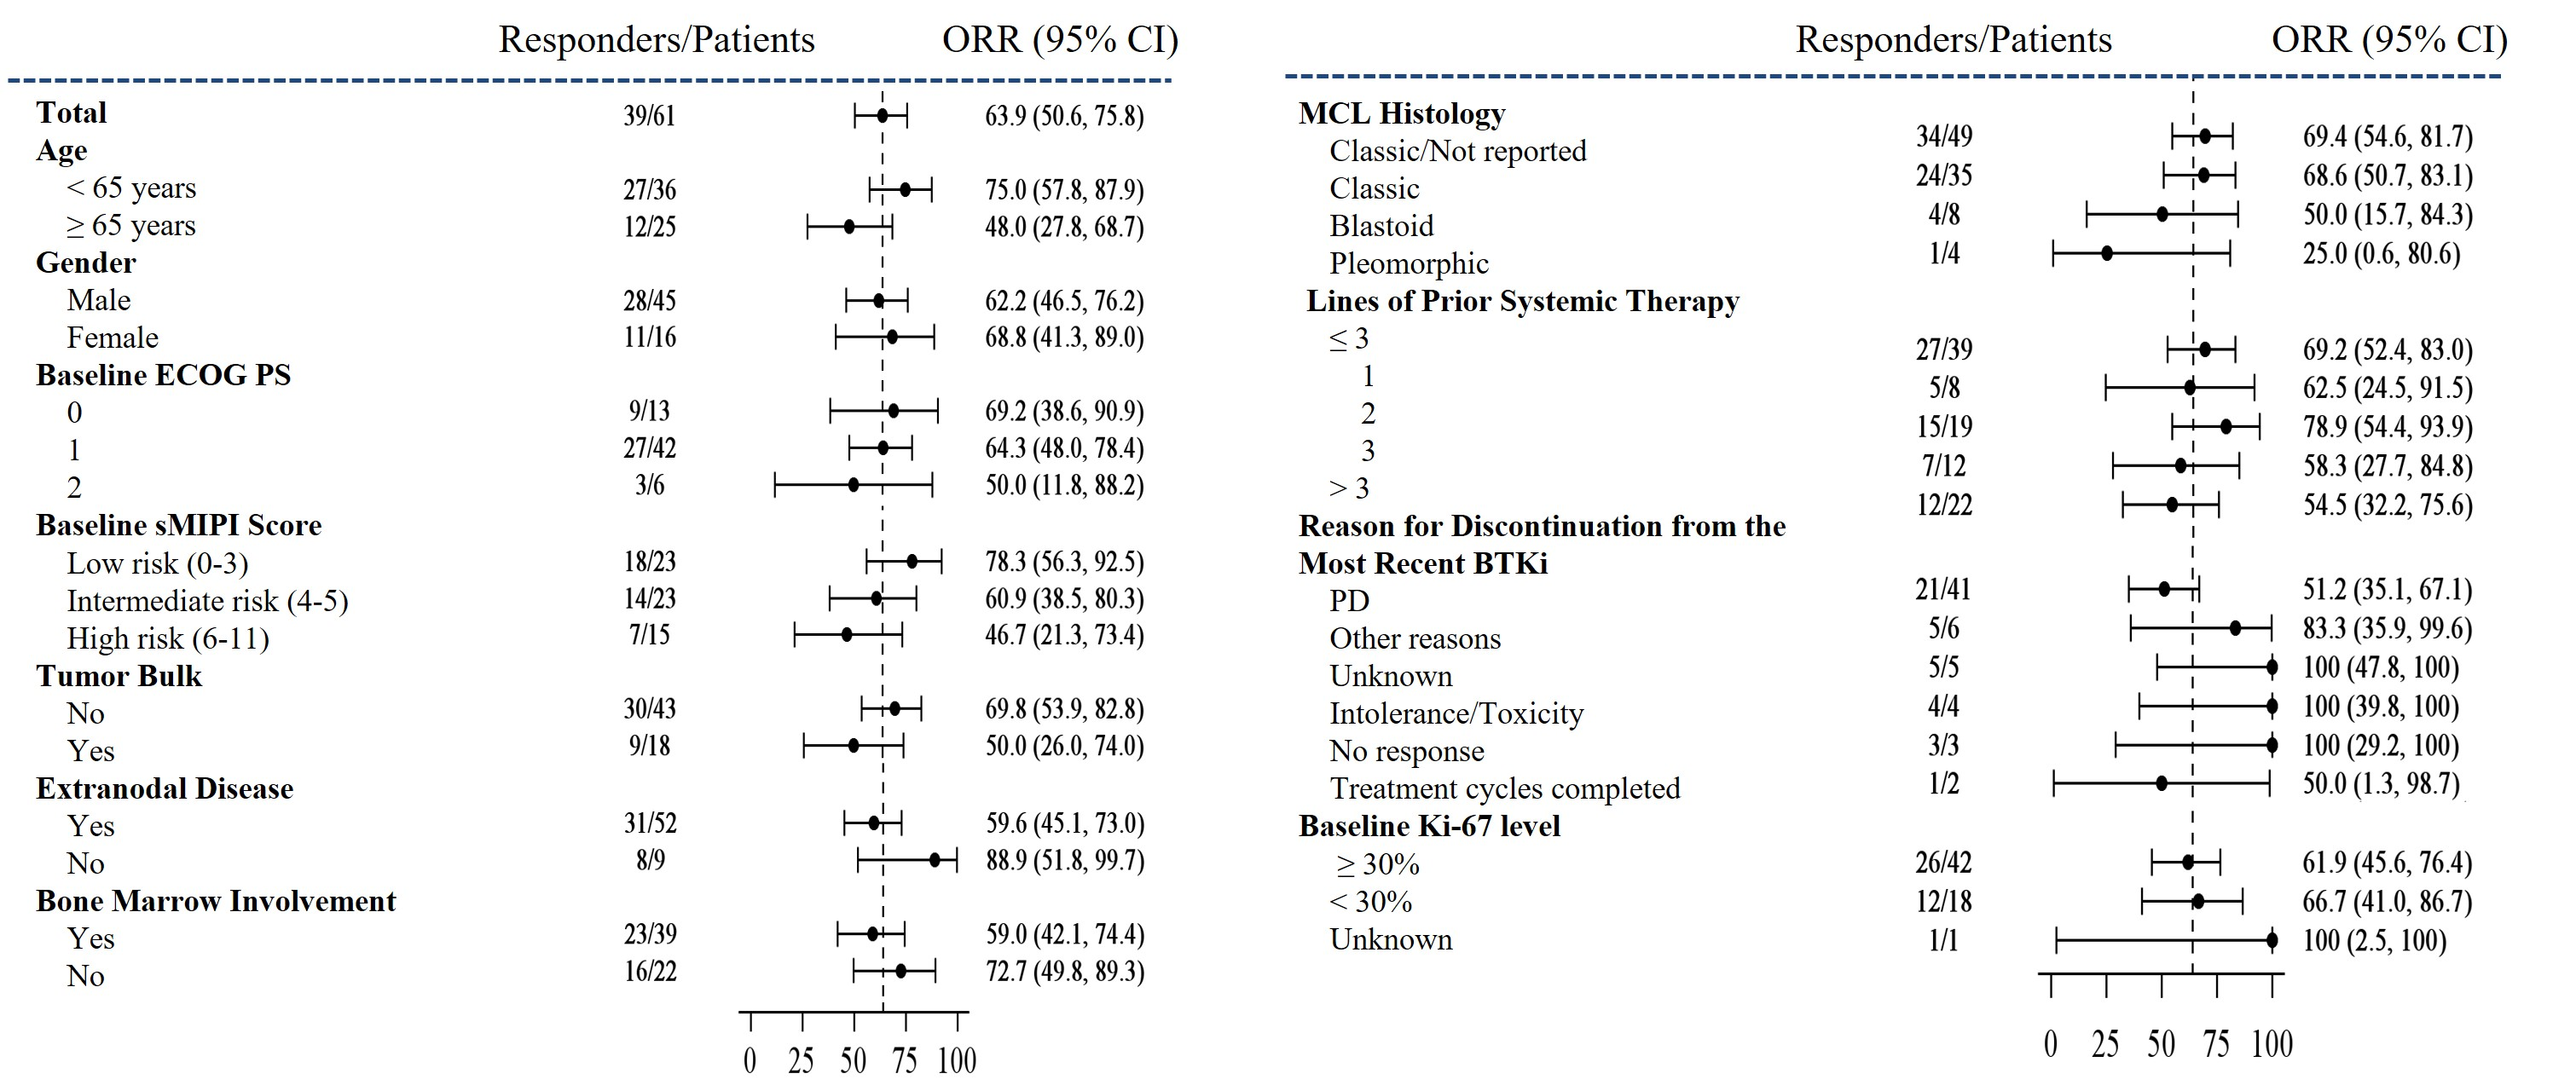


**Figure S1. Subgroup analysis of IRC-assessed ORR**

**Forest plot containing overall response by prespecified subgroups according to baseline demographic and clinical characteristics. 95% CIs were based on exact binomial distribution.**

**Figure S2. Kaplan-Meier curve of (A)** duration of response **(DOR), (B)** progression-free survival **(PFS) in patients with cBTKi pre-treated MCL treated with rocbrutinib** **assessed by investigators**
